# Supplementary material
Source: PubMed Central journal article supplement (PMC7261474)
Supplement: NIHMS1581809-supplement-supplmentary_material.pdf [file NIHMS1581809-supplement-supplmentary_material.pdf]

## Supplementary Information

### Peptidomimetic Vinyl-Heterocyclic Inhibitors of Cruzain Effect Anti-Trypanosomal Activity

Bala C. Chenna,<sup>†,#</sup> Linfeng Li,<sup>†,#</sup> Drake M. Mellott,<sup>†</sup> Xiang Zhai,<sup>†,‡</sup> Jair L. Siqueira-Neto,<sup>§</sup> Claudia Calvet,<sup>§</sup> Jean A. Bernatchez,<sup>§</sup> Emily Desormeaux,<sup>†,⊥</sup> Elizabeth Alvarez Hernandez,<sup>†</sup> Jana Gomez,<sup>†</sup> James H. McKerrow,<sup>§</sup> Jorge Cruz-Reyes,<sup>†</sup> and Thomas D. Meek<sup>†,\*</sup>

#Co-first authors

\*Corresponding author

<sup>†</sup>Department of Biochemistry & Biophysics, Texas A&M University, 301 Old Main Drive, College Station, TX 77843, United States.

<sup>‡</sup>Present address: Astra-Zeneca Pharmaceuticals, Waltham, MA 02451, United States.

<sup>§</sup>Skaggs School of Pharmacy and Pharmaceutical Sciences, University of California-San Diego, 9500 Gilman Drive, La Jolla, CA 92093, United States.

<sup>⊥</sup>Present address: Department of Chemistry, University of Illinois, 161 RAL, 600 South Matthews Ave, Urbana, IL 61801, United States.

## Contents

|                                                                                               |     |
|-----------------------------------------------------------------------------------------------|-----|
| <b>Part 1. Molecular Modeling</b> .....                                                       | S2  |
| <b>Part 2. Fitting of Time-Course Inhibition Data using Kintek Explorer<sup>®</sup></b> ..... | S4  |
| <b>Part 3. Thiolation of Cruzain Inhibitors by Glutathione</b> .....                          | S6  |
| <b>Part 4. Synthesis and Characterization of AMC-Peptide Substrates</b> .....                 | S7  |
| <b>Part 5. Structures of PVH Inhibitors 1-27</b> .....                                        | S14 |
| <b>Part 6. HPLC Traces of Synthesized Substrates and Inhibitors</b> .....                     | S16 |
| <b>Part 7. NMR Spectra of Synthesized Substrates and Inhibitors</b> .....                     | S34 |
| <b>Part 8. Unpublished Data</b> .....                                                         | S65 |

## Part 1. Molecular Modeling

In addition to compound **9**, we also utilized Schrodinger to develop both covalent and non-covalent models of compounds **7**, **11-13** and **15** bound to cruzain, also based on the crystal structure of **K11777** covalently bound to cruzain as described in the Experimental Section. The covalent and non-covalent models are in general similar in terms of the orientation of the peptide sidechains. The modeled structures differ, however, by virtue of the nature of how the molecular modeling was performed, leading to the distal positioning of the vinyl group in the non-covalent structures from the active-site residues Cys<sub>25</sub> and His<sub>162</sub>. Compounds **12** and **15** which each contain an N-methyl-pyridine, indicate that the methyl group with its attending positive charge is directed to His<sub>162</sub>, suggesting that the latter is neutral.

**Table S1. Predicted affinity of covalent docking for select structures**

| <b>Compound</b> | <b>Structure</b>             | <b>Cdock Affinity<br/>(kcal/mol)</b> | <b>Predicted<br/><math>K_i</math> (<math>\mu</math>M)</b> |
|-----------------|------------------------------|--------------------------------------|-----------------------------------------------------------|
| <b>7</b>        | Cbz-Phe-Phe-vinyl-2Pyrmd     | -7.11                                | 6.11                                                      |
| <b>9</b>        | NMePip-Phe-hPhe-vinyl-2Pyrmd | -7.01                                | 7.23                                                      |
| <b>11</b>       | Cbz-Phe-Phe-vinyl-2Pyr       | -7.17                                | 5.52                                                      |
| <b>12</b>       | Cbz-Phe-Phe-vinyl-2PyrNMe    | -8.00                                | 1.36                                                      |
| <b>13</b>       | Cbz-Phe-hPhe-vinyl-2Pyr      | -7.63                                | 2.54                                                      |
| <b>15</b>       | Cbz-Phe-hPhe-vinyl-2PyrNMe   | -8.32                                | 0.79                                                      |

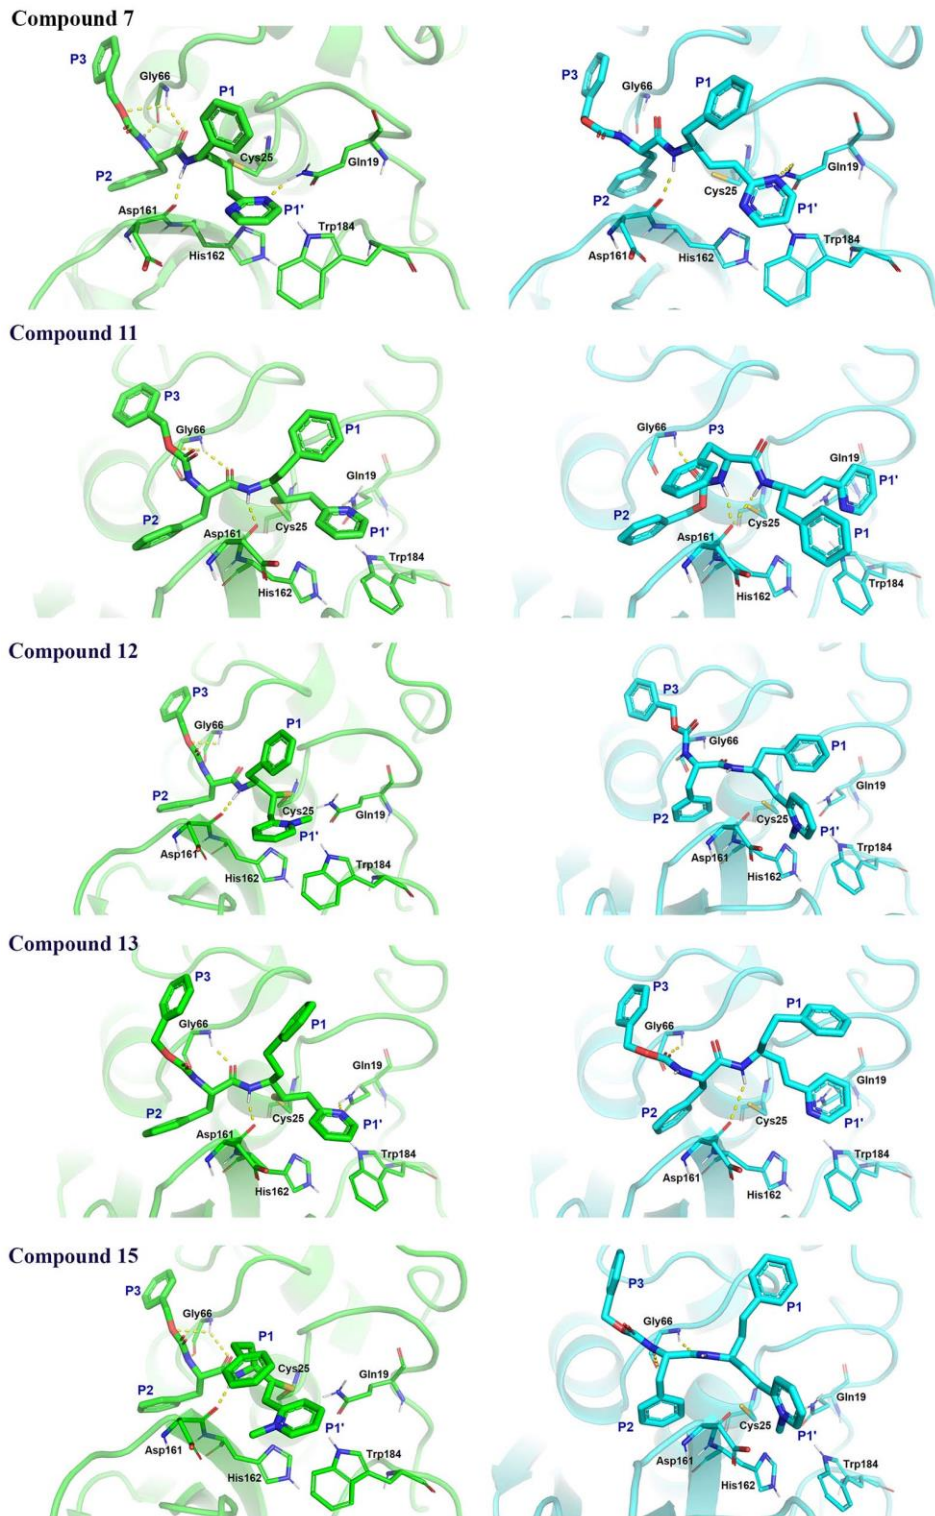

**Figure S1.** Molecular models of compound 7, 11-13, and 15 bound to cruzain created using Schrodinger. Left panels: binding poses in which a covalent bond is formed between the  $\beta$ -carbon of the vinyl group of the inhibitor. Right panels: binding poses in which no covalent bond is formed with Cys25.

## Part 2. Fitting of Time-Course Inhibition Data using Kintek Explorer®

In addition to data fitting as described in the Experimental Section, time courses for PVH inhibitors found in **Table 4** and elsewhere were fitted using Kintek Explorer, using both a single-step and two-step binding model (**Scheme S1**).

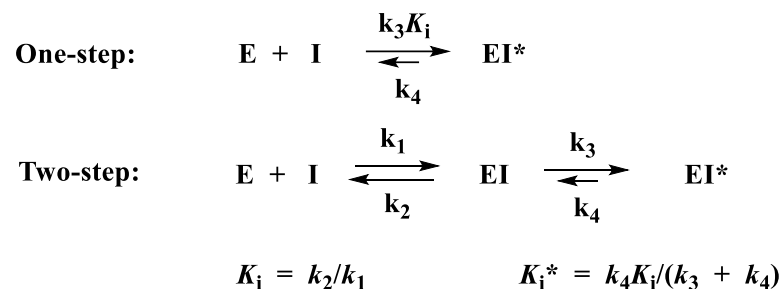

**Scheme S1**

Fitted parameters from the one-step model: Sigma: 91.608;  $k_3 K_i = 0.0246 \pm 0.000045 \mu\text{M}^{-1} \text{s}^{-1}$ ,  $k_4 = 0.00175 \pm 0.00005 \text{s}^{-1}$ ,  $k_4/k_3 K_i = 0.071 \pm 0.001 \mu\text{M}$ . Fitted parameters from the two-step model: Sigma: 89.323;  $k_1 = 0.02 \pm 0.02 \mu\text{M}^{-1} \text{s}^{-1}$ ,  $k_2 = 0.07 \pm 0.099 \text{s}^{-1}$ ,  $k_3 = 0.0058 \pm 0.001 \mu\text{M}^{-1} \text{s}^{-1}$ ,  $k_4 = 0.0011 \pm 0.0008 \text{s}^{-1}$ ,  $K_i = 0.40 \pm 0.02 \mu\text{M}$ , and  $K_i^* = 0.06 \mu\text{M}$ . The lower value of Sigma for the two-step indicates a slightly better fit, albeit with more poorly determined individual rate constants. Note that when  $k_4 \ll k_3$ ,  $K_i^* \sim k_4 K_i / k_3$ , as is reflected in the values calculated from both models above:  $k_4/k_3 K_i \sim K_i^* = 0.071 \pm 0.001 \mu\text{M}$  and  $K_i^* = 0.06 \mu\text{M}$ . These values of  $K_i^*$  compared favorably with the value of  $K_i^* = 0.126 \pm 0.004 \mu\text{M}$  determined by global fitting as reported in **Table 2**. Application of fitting by Kintek Explorer for potent cruzain inhibitors **11-13** provided respective values for the two models of:  $k_4/k_3 K_i \sim K_i^* = 0.23 \pm 0.02 \mu\text{M}$  and  $K_i^* = 0.6 \mu\text{M}$ ,  $k_4/k_3 K_i \sim K_i^* = 0.474 \pm 0.002 \mu\text{M}$  and  $K_i^* = 0.4 \mu\text{M}$ , and  $k_4/k_3 K_i \sim K_i^* = 0.233 \pm 0.008 \mu\text{M}$  and  $K_i^* = 0.2 \mu\text{M}$ , which again are comparable to their respective values of  $K_i^*$  obtained by global data fitting as reported in **Table 2**.

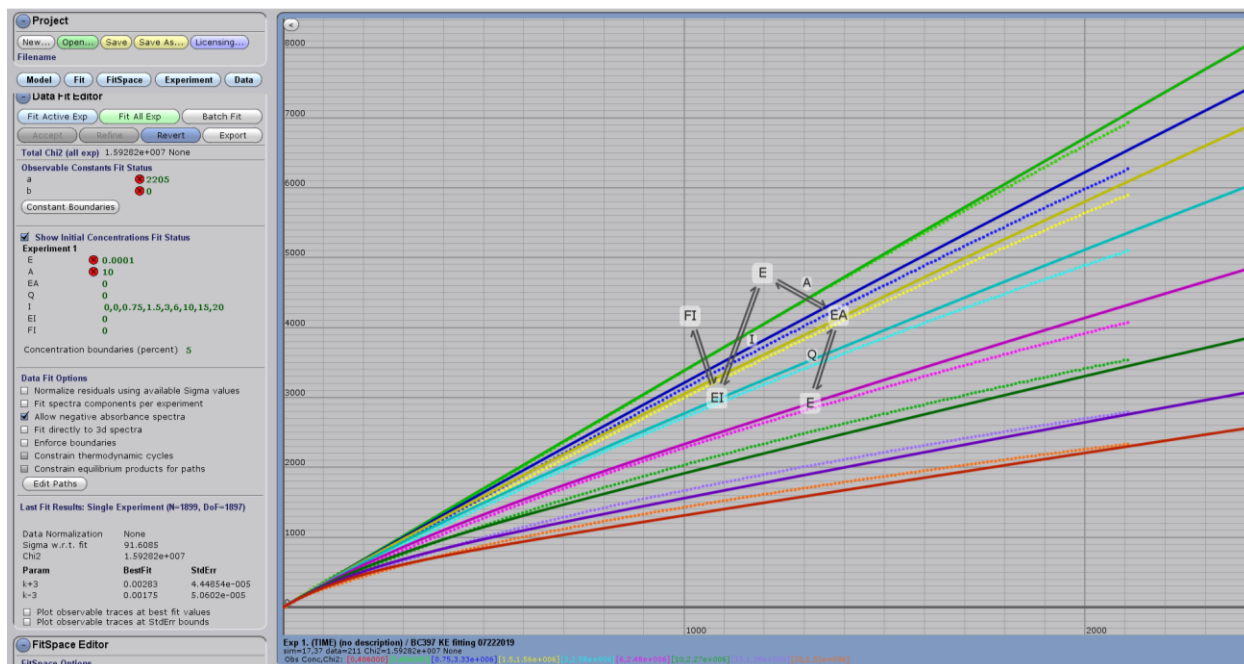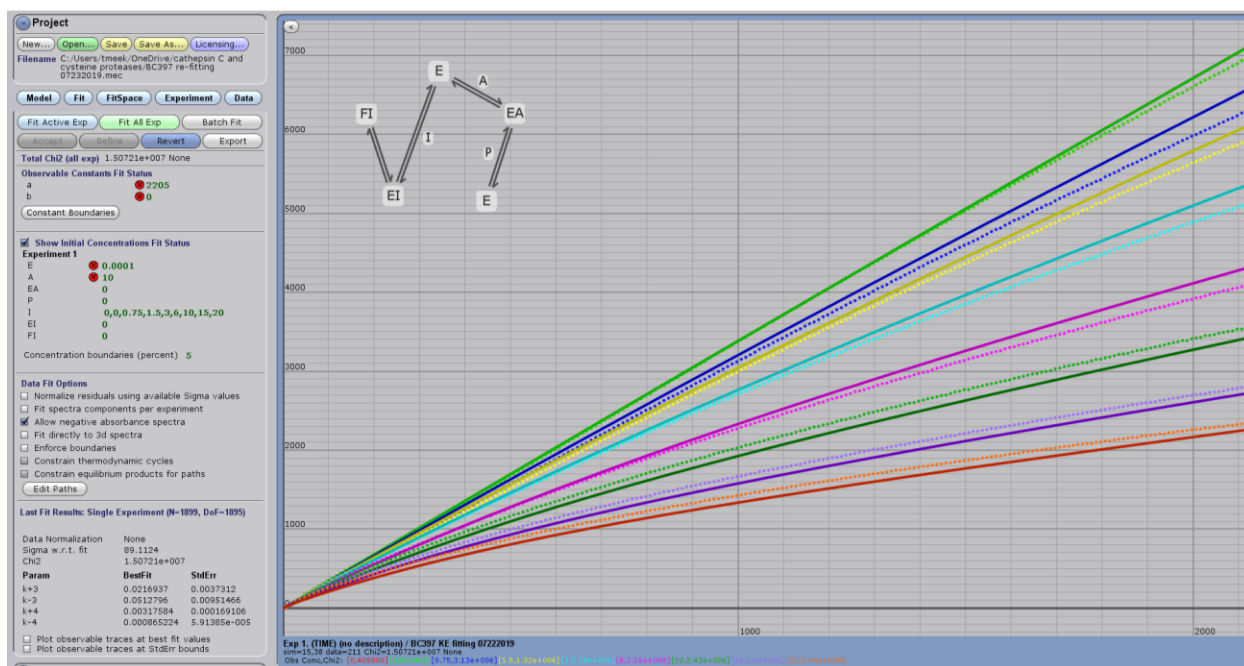

**Figure S2.** Time-dependent inhibition of cruzain by **15** depicting formation of product AMC vs. time for 0-2100 sec using the one-step model (top) and two-step model (bottom) at micromolar concentrations of **15** of 0 (green), 0.75 (blue), 1.5 (yellow), 3.0 (cyan), 6.0 (magenta), 10.0 (dark green), 15.0 (purple) and 20.0 (orange). Fitting of time course using Kintek Explorer with resulting rate constants obtained from fitting of the 2-step model of **Scheme S1**.

### Part 3. Thiolation of Cruzain Inhibitors by Glutathione

**Table S2. Kinetic Constants of Thiolation of Cruzain Inhibitors<sup>a</sup>**

| Compound              | Rate of Thiolation, $k$ ( $\text{mM}^{-1}\text{min}^{-1}$ ) | $K_{eq}$ ( $\text{M}^{-1}$ ) |
|-----------------------|-------------------------------------------------------------|------------------------------|
| <b>K11777</b>         | $0.00028 \pm 0.0004$                                        | NA                           |
| <b>7</b>              | Negligible                                                  | NA                           |
| <b>11</b>             | Negligible                                                  | NA                           |
| <b>12</b>             | $0.037 \pm 0.002$                                           | 7400                         |
| <b>15</b>             | $0.054 \pm 0.004$                                           | 2400                         |
| <b>17<sup>b</sup></b> | Negligible                                                  | NA                           |
| <b>25</b>             | Negligible                                                  | NA                           |
| <b>26</b>             | $0.015 \pm 0.005$                                           | 930                          |

<sup>a</sup> 1 mM glutathione was mixed with 0.5 mM K11777 and compounds in Tris (pH 8.0), 10% DMSO (v/v) at room temperature. Aliquots were analyzed by LCMS as described; <sup>b</sup> 5mM glutathione was used for **17**; NA, not applicable.

#### Part 4. Synthesis and Characterization of AMC-Peptide Substrates

*Boc-L-homophenylalanine-AMC*: *tert-butyl (S)-1-((4-methyl-2-oxo-2H-chromen-7-yl)amino)-1-oxo-4-phenylbutan-2-yl)carbamate*. A round bottom flask charged with Boc-L-homophenylalanine (1.5 g, 5.64 mmol) and 7-amino-4-methylcoumarin (627.2 mg, 3.58 mmol) was purged with N<sub>2</sub> gas yielding positive pressure. Anhydrous dichloromethane (50 ml) and tetrahydrofuran (15 mL) was added followed by the addition of N,N-diisopropylethylamine (915  $\mu$ L, 5.25 mmol). Propylphosphonic anhydride in a 50% wt. solution of ethyl acetate (3.2 mL, 5.37 mmol) was added dropwise at 0°C resulting in a yellow color. The reaction was allowed to react for 30 hours and was monitored by TLC (3:1 hexanes:ethyl acetate) or LC-MS analysis. Solvents were removed and the yellow oil was solubilized in DCM (~60 mL) and washed with water (25 mL, 4x) and brine (25 mL, 2x). The organic layer was dried over Na<sub>2</sub>SO<sub>4</sub> and solvents removed under reduced pressure to yield an off white solid. The crude amide directly used for the next reaction without purification. LC-MS Rt: 5.59 min, *m/z* 437.3 ([M+H]<sup>+</sup>, C<sub>25</sub>H<sub>28</sub>N<sub>2</sub>O<sub>5</sub><sup>+</sup> Calcd 437.21

*H<sub>2</sub>N-L-homophenylalanine-AMC-TFA*: *(S)-1-((4-methyl-2-oxo-2H-chromen-7-yl)amino)-1-oxo-4-phenylbutan-2-yl)aminium-TFA*. A round bottom flask charged with Boc-L-homophenylalanine-AMC (60 mg, 0.137 mmol) was purged with N<sub>2</sub> gas yielding positive pressure. Anhydrous dichloromethane (6 mL) was added followed by the dropwise addition of trifluoroacetic acid (2 mL) at 0°C. The reaction was monitored via TLC (3:1 hexanes:ethyl acetate) and was complete following 1.5 hours. The solvents were removed under reduced pressure and co-evaporated with chloroform (15 mL, 4x) and ether (15 mL, 2x) to yield a tan solid. LC-MS analysis verified the formation of the desired amine. The product was directly used for the next reaction without purification.

(S2) *Cbz-L-phenylalanine-L-homophenylalanine-AMC*: *Benzyl ((S)-1-(((S)-1-((4-methyl-2-oxo-2H-chromen-7-yl)amino)-1-oxo-4-phenylbutan-2-yl)amino)-1-oxo-3-phenylpropan-2-yl)carbamate*. A round bottom flask charged with <sup>3</sup>H<sub>3</sub>N-L-homophenylalanine-TFA (60 mg, 0.138 mmol) and Cbz-phenylalanine-OH (49.5 mg, 0.166 mmol) was purged with N<sub>2</sub> gas yielding positive pressure. Anhydrous dichloromethane (4 mL) was added followed by the addition of N,N-diisopropylethylamine (120  $\mu$ L, 0.69 mmol). Propylphosphonic anhydride in a 50% wt. solution of ethyl acetate (164  $\mu$ L, 0.276 mmol) was added dropwise at 0°C resulting in a yellow color. The reaction was allowed to react for 45 minutes or until no starting material remained via TLC (3:1 hexanes:ethyl acetate v/v) and LC-MS analysis. Solvents were removed and the yellow oil was solubilized in DCM (~20 mL) and washed with water (10 mL, 4x) and brine (10 mL, 1x). The organic layer was dried over Na<sub>2</sub>SO<sub>4</sub> and solvents removed under reduced pressure to yield a yellow solid. The crude was purified via preparative HPLC to yield the desired amide (50.1 mg, 59% yield) as a white powder. <sup>1</sup>H NMR (400 MHz, DMSO)  $\delta$  1.91 – 2.17 (m, 2H), 2.41 (d, *J* = 1.2 Hz, 3H), 2.56 – 2.89 (m, 3H), 3.07 (dd, *J* = 13.7, 4.1 Hz, 1H), 4.30 – 4.60 (m, 2H), 4.84 – 5.11 (m, 2H), 6.28

(d,  $J = 1.5$  Hz, 1H), 7.10 – 7.39 (m, 14H), 7.45 – 7.60 (m, 2H), 7.68 – 7.85 (m, 2H), 8.40 (d,  $J = 7.7$  Hz, 1H), 10.46 (s, 1H). LC-MS Rt: 5.88 min,  $m/z$  618.4 ( $[M+H]^+$ ),  $C_{37}H_{35}N_3O_6^+$  Calcd 618.3.

*(S3) Cbz-L-leucine-L-homophenylalanine-AMC: benzyl ((S)-4-methyl-1-(((S)-1-((4-methyl-2-oxo-2H-chromen-7-yl)amino)-1-oxo-4-phenylbutan-2-yl)amino)-1-oxopentan-2-yl)carbamate.* A round bottom flask charged with  $^+H_3N$ -L-homophenylalanine • TFA (64 mg, 0.142 mmol) and Cbz-Leucine-OH (49.1 mg, 0.185 mmol) was purged with  $N_2$  gas yielding positive pressure. Anhydrous dichloromethane (4 mL) and tetrahydrofuran (4 mL) was added followed by the addition of N,N-diisopropylethylamine (124  $\mu$ L, 0.71 mmol). Propylphosphonic anhydride in a 50% wt. solution of ethyl acetate (164  $\mu$ L, 0.276 mmol) was added dropwise at 0°C resulting in a yellow color. The reaction was allowed to react for 45 minutes and no starting material remained via TLC (3:1 hexanes:ethyl acetate v/v) and LC-MS analysis. Solvents were removed and the yellow oil was solubilized in DCM (~20 mL) and washed with water (10 mL, 4x) and brine (10 mL, 1x). The organic layer was dried over  $Na_2SO_4$  and solvents removed under reduced pressure to yield a yellow solid. The crude amide was purified via preparative HPLC to yield (48.9 mg, 59%) as a white powder.  $^1H$  NMR (400 MHz, DMSO)  $\delta$  0.90 (t,  $J = 6.9$  Hz, 6H), 1.50 (t,  $J = 7.3$  Hz, 2H), 1.68 (t,  $J = 7.0$  Hz, 1H), 2.02 (d,  $J = 32.8$  Hz, 2H), 2.41 (s, 3H), 2.54 – 2.79 (m, 3H), 4.15 (q,  $J = 7.8$  Hz, 1H), 4.47 (s, 1H), 5.06 (s, 2H), 6.27 (s, 1H), 7.09 – 7.41 (m, 9H), 7.49 (t,  $J = 8.9$  Hz, 2H), 7.64 – 7.86 (m, 2H), 8.25 (d,  $J = 7.7$  Hz, 1H), 10.42 (s, 1H). LC-MS Rt: 5.88 min,  $m/z$  584.3 ( $[M+H]^+$ ),  $C_{34}H_{37}N_3O_6^+$  Calcd 584.3

*Boc-L-4-pyridylalanine-AMC: tert-butyl (S)-1-((4-methyl-2-oxo-2H-chromen-7-yl)amino)-1-oxo-3-(pyridin-4-yl)propan-2-yl)carbamate.* A round bottom flask charged with Boc-L-4-pyridylalanine-OH (325 mg, 1.22 mmol) and 7-amino-4-methylcoumarin (164.5 mg, 0.939 mmol) was purged with  $N_2$  gas yielding positive pressure. Anhydrous dichloromethane (6 mL) and tetrahydrofuran (14 mL) was added followed by the addition of N,N-diisopropylethylamine (600  $\mu$ L, 3.44 mmol). Propylphosphonic anhydride in a 50% wt. solution of ethyl acetate (1.125 mL, 1.89 mmol) was added dropwise at 0°C resulting in a yellow color. The reaction was allowed to react for 15 hours and product formation was monitored via TLC (1% MeOH:DCM v/v) and LC-MS analysis. Solvents were removed under reduced pressure and the yellow oil was solubilized in DCM (~30 mL) and washed with water (15 mL, 4x) and brine (15 mL, 2x). The organic layer was dried over  $Na_2SO_4$  and solvents were removed under reduced pressure. The resulting yellow solid was deemed pure enough (~94% via LC-MS, 425 mg) to proceed directly to the next step. LC-MS Rt: 2.84 min,  $m/z$  424.26 ( $[M+H]^+$ ),  $C_{23}H_{25}N_3O_5^+$  Calcd 424.2

*$NH_2$ -L-4-pyridylalanine-AMC • TFA: (S)-1-((4-methyl-2-oxo-2H-chromen-7-yl)amino)-1-oxo-3-(pyridin-4-yl)propan-2-aminium • TFA.* A round bottom flask charged with Boc-L-4-pyridylalanine-AMC (150 mg, 0.353 mmol) was purged with  $N_2$  gas yielding positive pressure. Anhydrous dichloromethane (10 mL) was added followed by the dropwise addition of trifluoroacetic acid (3 mL) at 0°C. The reaction was monitored



via TLC (1% MeOH:DCM v/v) and was complete following 1.5 hours. The solvents were removed under reduced pressure and co-evaporated with chloroform and ether to yield a yellow solid. LCMS analysis verified the formation of the product. The product was directly used for the next reaction without purification.

*(S5) Cbz-L-phenylalanine-L-4-pyridylalanine-AMC: Benzyl ((S)-1-(((S)-1-((4-methyl-2-oxo-2H-chromen-7-yl)amino)-1-oxo-3-(pyridin-4-yl)propan-2-yl)amino)-1-oxo-3-phenylpropan-2-yl)carbamate.* A round bottom flask charged with  $^+H_3N$ -L-4-pyridylalanine • TFA (154 mg, 0.352 mmol) and Cbz-phenylalanine-OH (137.3 mg, 0.459 mmol) was purged with  $N_2$  gas yielding positive pressure. Anhydrous dichloromethane (10 mL) and tetrahydrofuran (2 mL) was added followed by the addition of N,N-diisopropylethylamine (367.9  $\mu$ L, 2.11 mmol). Propylphosphonic anhydride in a 50% wt. solution of ethyl acetate (419.1  $\mu$ L, 0.704 mmol) was added dropwise at 0°C resulting in a yellow color. The reaction was allowed to react for 45 minutes or until no starting material remained via TLC (1% MeOH:DCM v/v) and LC-MS analysis. Solvents were removed and the yellow oil was solubilized in DCM (~30 mL) and washed with water (15 mL, 4x) and brine (15 mL, 1x). The organic layer was dried over  $Na_2SO_4$  and solvents removed under reduced pressure to yield a yellow solid. 100 mg of the crude was purified via preparative HPLC to yield (32.94 mg, 39%) as a white powder.  $^1H$  NMR (400 MHz, DMSO)  $\delta$  2.33 – 2.45 (m, 3H), 2.72 (dd,  $J$  = 13.9, 10.5 Hz, 1H), 2.85 – 3.09 (m, 2H), 3.14 (dd,  $J$  = 13.9, 5.4 Hz, 1H), 4.14 – 4.37 (m, 1H), 4.68 – 4.89 (m, 1H), 4.96 (s, 2H), 6.29 (d,  $J$  = 1.5 Hz, 1H), 7.25 (tt,  $J$  = 22.3, 14.7, 13.7, 6.4 Hz, 12H), 7.39 – 7.54 (m, 2H), 7.75 (d,  $J$  = 8.7 Hz, 2H), 8.25 – 8.56 (m, 3H), 10.52 (s, 1H). LC-MS Rt: 3.57 min,  $m/z$  605.3 ( $[M+H]^+$ ),  $C_{35}H_{32}N_4O_6^+$  Calcd 605.23.

*N-methyl-piperazine-L-phenylalanine-OH: (4-methylpiperazine-1-carbonyl)-L-phenylalanine.* A round bottom flask charged with methyl (4-methylpiperazine-1-carbonyl)-L-phenylalanine (500 mg, 1.64 mmol) was purged with  $N_2$  gas yielding positive pressure. Anhydrous methanol (8.5 mL) and tetrahydrofuran (8.5 mL) was added followed by the addition of 0.5 M LiOH in  $H_2O$  (17 mL, 8.5 mmol). The reaction was monitored by TLC (5% MeOH:DCM v/v) and after 3.5 hours the reaction was stopped and solvents were removed under reduced pressure. The reaction mixture was dissolved in acidified water (0.5 M HCl, 10 mL) to neutralize the unreacted LiOH and the solvent was removed under reduced pressure. The crude compound was then transferred to the next reaction step without purification.

*(S7) N-methyl-piperazine-L-phenylalanine-L-homophenyl-alanine-AMC: 4-methyl-N-((S)-1-(((S)-1-((4-methyl-2-oxo-2H-chromen-7-yl)amino)-1-oxo-4-phenylbutan-2-yl)amino)-1-oxo-3-phenylpropan-2-yl)piperazine-1-carboxamide.* A round bottom flask charged with  $^+H_3N$ -L-homophenylalanine • TFA (105 mg, 0.313 mmol) and N-methyl-piperazine-phenylalanine-OH (160 mg, 0.55 mmol) was purged with  $N_2$  gas yielding positive pressure. Anhydrous dichloromethane (10 mL) was added followed by the addition of

N,N-diisopropylethylamine (274  $\mu$ L, 1.57 mmol). Propylphosphonic anhydride in a 50% wt. solution of ethyl acetate (377  $\mu$ L, 0.626 mmol) was added dropwise at 0°C resulting in a yellow color. The reaction was allowed to react for 45 minutes and no starting material remained via TLC (1:1 ethyl acetate: hexanes v/v) and LC-MS analysis. Solvents were removed and the yellow oil was solubilized in DCM (~20 mL) and washed with water (10 mL, 4x) and brine (10 mL, 1x). The organic layer was dried over Na<sub>2</sub>SO<sub>4</sub> and solvents removed under reduced pressure to yield a yellow solid. The crude amide was purified via preparative HPLC to yield (21.1 mg, 11%) of a white powder. <sup>1</sup>H NMR (400 MHz, CDCl<sub>3</sub>)  $\delta$  1.94 – 2.16 (m, 6H), 2.31 (s, 4H), 2.32 – 2.41 (m, 5H), 2.42 (d, *J* = 1.2 Hz, 4H), 2.73 (t, *J* = 7.4 Hz, 2H), 2.85 – 3.04 (m, 2H), 3.25 (ddd, *J* = 12.7, 10.6, 4.9 Hz, 3H), 3.41 (ddt, *J* = 12.5, 5.6, 2.9 Hz, 3H), 4.36 (dt, *J* = 8.7, 5.3 Hz, 1H), 4.60 (td, *J* = 8.5, 4.5 Hz, 1H), 4.78 (d, *J* = 4.4 Hz, 1H), 6.20 (d, *J* = 1.4 Hz, 1H), 6.60 (d, *J* = 8.2 Hz, 1H), 7.12 – 7.40 (m, 10H), 7.52 (d, *J* = 8.5 Hz, 1H), 7.68 – 7.82 (m, 2H), 9.16 (s, 1H). LC-MS Rt: 3.29 min, *m/z* 610.1 ([M+H]<sup>+</sup>, C<sub>35</sub>H<sub>39</sub>N<sub>5</sub>O<sub>5</sub><sup>+</sup> Calcd 610.3).

*Boc-L-4-pyridylalanine-L-homophenylalanine-AMC*: *tert-butyl ((S)-1-(((S)-1-((4-methyl-2-oxo-2H-chromen-7-yl)amino)-1-oxo-4-phenylbutan-2-yl)amino)-1-oxo-3-(pyridin-4-yl)propan-2-yl)carbamate*. A round bottom flask charged with <sup>3</sup>H<sub>3</sub>N-L-homophenylalanine • TFA (146 mg, 0.325 mmol) and Boc-L-4-pyridylalanine-OH (104 mg, 0.39 mmol) was purged with N<sub>2</sub> gas yielding positive pressure. Anhydrous dichloromethane (10 mL) was added followed by the addition of N,N-diisopropylethylamine (283  $\mu$ L, 1.63 mmol). Propylphosphonic anhydride in a 50% wt. solution of ethyl acetate (387  $\mu$ L, 0.65 mmol) was added dropwise at 0°C resulting in a yellow color. The reaction was allowed to react for 45 minutes and no starting material remained via TLC (1:1 hexanes:ethyl acetate v/v) and LC-MS analysis. Solvents were removed and the yellow oil was solubilized in DCM (~20 mL) and washed with water (10 mL, 4x) and brine (10 mL, 1x). The organic layer was dried over Na<sub>2</sub>SO<sub>4</sub> and solvents removed under reduced pressure to yield a yellow solid. The crude amide was moved directly to the next step with no purification. LC-MS Rt: 3.57 min, *m/z* 581.7 ([M+H]<sup>+</sup>, C<sub>33</sub>H<sub>36</sub>N<sub>4</sub>O<sub>6</sub><sup>+</sup> Calcd 581.3).

*NH<sub>2</sub>-L-4-pyridylalanine-L-homophenylalanine-AMC•TFA*: *S)-1-(((S)-1-((4-methyl-2-oxo-2H-chromen-7-yl)amino)-1-oxo-4-phenylbutan-2-yl)amino)-1-oxo-3-(pyridin-4-yl)propan-2-aminium TFA*. A round bottom flask charged with Boc-L-4-pyridylalanine-L-homophenylalanine-AMC (172 mg, 0.294 mmol) was purged with N<sub>2</sub> gas yielding positive pressure. Anhydrous dichloromethane (10 mL) was added followed by the dropwise addition of trifluoroacetic acid (5 mL) at 0°C. The reaction was monitored via TLC (1:1 hexanes:ethyl acetate) and was complete following 1.5 hours. The solvents were removed under reduced pressure and co-evaporated with chloroform (15 mL, 4x) and ether (15 mL, 2x) to yield a tan solid. LC-MS analysis verified the formation of the desired amine. The product was directly used for the next reaction without purification.

(S8) *Cbz-L-4-pyridylalanine-L-homophenylalanine-AMC*: *Benzyl ((S)-1-(((S)-1-((4-methyl-2-oxo-2H-chromen-7-yl)amino)-1-oxo-4-phenylbutan-2-yl)amino)-1-oxo-3-(pyridin-4-yl)propan-2-yl)carbamate*. A round bottom flask charged with *NH<sub>2</sub>-L-4-pyridylalanine-L-homophenylalanine-AMC-TFA* (227 mg, 0.379 mmol; excess weight is due to residual TFA salts) was purged with N<sub>2</sub> gas yielding positive pressure. Anhydrous ethanol (4 mL) was added followed by the addition of a solution of sodium bicarbonate (127 mg, 1.52 mmol) in water (4 mL). Subsequently, a solution of benzyl chloroformate (107  $\mu$ L, 0.76 mmol) in 1,4 dioxanes (4 mL) was added dropwise and the reaction was allowed to react overnight. Solvents were removed under reduced pressure and the reaction mixture was solubilized in dichloromethane (30 mL) and washed with H<sub>2</sub>O (10 mL, 3x), brine (10 mL, 2x). The organic layer was dried over Na<sub>2</sub>SO<sub>4</sub> and solvents removed under reduced pressure to yield an orange oil. The crude amide was purified via preparative HPLC to yield (45.9 mg, 20%) as a white powder. <sup>1</sup>H NMR (400 MHz, MeOD)  $\delta$  1.88 – 2.27 (m, 2H), 2.44 (d, *J* = 1.3 Hz, 3H), 2.68 (dddd, *J* = 20.0, 15.3, 12.7, 7.8, 3.3 Hz, 2H), 2.96 (dd, *J* = 14.1, 9.2 Hz, 1H), 3.22 (dd, *J* = 13.9, 5.3 Hz, 1H), 4.50 (dd, *J* = 8.8, 5.3 Hz, 1H), 4.57 (dd, *J* = 9.1, 5.3 Hz, 1H), 5.05 (d, *J* = 3.5 Hz, 2H), 6.21 (d, *J* = 1.5 Hz, 1H), 7.01 – 7.37 (m, 12H), 7.47 (dd, *J* = 8.7, 2.1 Hz, 1H), 7.55 – 7.72 (m, 1H), 7.78 (d, *J* = 2.0 Hz, 1H), 8.33 (d, *J* = 5.1 Hz, 2H). LC-MS Rt: 3.79 min, *m/z* 617.5 ([M+H]<sup>+</sup>), C<sub>36</sub>H<sub>34</sub>N<sub>4</sub>O<sub>6</sub><sup>-</sup> Calcd 617.3.

*Boc-L-phenylalanine-AMC*: *tert-butyl (S)-1-(((4-methyl-2-oxo-2H-chromen-7-yl)amino)-1-oxo-3-phenylpropan-2-yl)carbamate*. A round bottom flask charged with *Boc-L-phenylalanine* (380 mg, 1.43 mmol) and 7-amino-4-methylcoumarin (193 mg, 1.1 mmol) was purged with N<sub>2</sub> gas yielding positive pressure. Anhydrous tetrahydrofuran (30 mL) was added followed by the addition of N,N-diisopropylethylamine (958  $\mu$ L, 5.5 mmol). Propylphosphonic anhydride in a 50% wt. solution of ethyl acetate (1.31 mL, 2.2 mmol) was added dropwise at 0°C resulting in a yellow color. The reaction was allowed to react for 15 hours was monitored by TLC (3:1 hexanes:ethyl acetate) or LC-MS analysis. Solvents were removed and the yellow oil was solubilized in DCM (~80 mL) and washed with water (30 mL, 4x) and brine (30 mL, 2x). The organic layer was dried over Na<sub>2</sub>SO<sub>4</sub> and solvents removed under reduced pressure to yield a yellow solid. The crude amide was purified via preparative HPLC (363 mg, 78%) LC-MS Rt: 5.31 min, *m/z* 423.3 ([M+H]<sup>+</sup>), C<sub>24</sub>H<sub>26</sub>N<sub>2</sub>O<sub>5</sub><sup>+</sup> Calcd 423.2.

*H<sub>2</sub>N-L-phenylalanine-AMC•TFA*: *(S)-1-(((4-methyl-2-oxo-2H-chromen-7-yl)amino)-1-oxo-3-phenylpropan-2-aminium)•TFA*. A round bottom flask charged with *Boc-L-phenylalanine-AMC* (40 mg, 0.095 mmol) was purged with N<sub>2</sub> gas yielding positive pressure. Anhydrous dichloromethane (3 mL) was added followed by the dropwise addition of trifluoroacetic acid (1 mL) at 0°C. The reaction was monitored via TLC and was complete following 1.5 hours. The solvents were removed under reduced pressure and co-evaporated with chloroform (15 mL, 4x) and ether (15 mL, 2x) to yield a tan solid. LCMS analysis

verified the formation of the desired amine. The product was directly used for the next reaction without purification.

*(S9) Cbz-L-phenylalanine-L-phenylalanine-AMC: benzyl ((S)-1-(((S)-1-((4-methyl-2-oxo-2H-chromen-7-yl)amino)-1-oxo-3-phenylpropan-2-yl)amino)-1-oxo-3-phenylpropan-2-yl)carbamate.* A round bottom flask charged with <sup>+</sup>H<sub>3</sub>N-L-phenylalanine •TFA (40 mg, 0.092 mmol) and Cbz-phenylalanine-OH (33 mg, 0.11 mmol) was purged with N<sub>2</sub> gas yielding positive pressure. Anhydrous dichloromethane (5 mL) and was added followed by the addition of N,N-diisopropylethylamine (80 μL, 0.46 mmol). Propylphosphonic anhydride in a 50% wt. solution of ethyl acetate (110 μL, 0.18 mmol) was added dropwise at 0°C resulting in a yellow color. The reaction was allowed to react for 45 minutes and no starting material remained via TLC (3:1 hexanes:ethyl acetate v/v) and LC-MS analysis. Solvents were removed and the yellow oil was solubilized in dichloromethane (~20 mL) and washed with water (10 mL, 4x) and brine (10 mL, 1x). The organic layer was dried over Na<sub>2</sub>SO<sub>4</sub> and solvents removed under reduced pressure to yield a yellow solid. The crude amide was purified via preparative HPLC to yield (34.2 mg, 62%) as a white powder. <sup>1</sup>H NMR (400 MHz, DMSO) δ 2.41 (s, 3H), 2.72 (dd, *J* = 13.9, 10.5 Hz, 1H), 2.87 – 3.05 (m, 2H), 3.11 (dd, *J* = 13.8, 5.8 Hz, 1H), 4.30 (td, *J* = 9.6, 9.0, 4.2 Hz, 1H), 4.73 (q, *J* = 7.5 Hz, 1H), 4.96 (s, 2H), 6.28 (s, 1H), 7.06 – 7.39 (m, 15H), 7.39 – 7.53 (m, 2H), 7.60 – 7.79 (m, 2H), 8.37 (d, *J* = 7.8 Hz, 1H), 10.47 (s, 1H). LC-MS Rt: 5.68 min, *m/z* 603.4 ([M+H]<sup>+</sup>, C<sub>36</sub>H<sub>33</sub>N<sub>3</sub>O<sub>6</sub><sup>+</sup> Calcd 604.2.

*Cbz-L-arginine(Mtr)-L-homophenylalanine-AMC: Benzyl ((S)-5-(3-((4-methoxy-2,6-dimethylphenyl)sulfonyl)guanidino)-1-(((S)-1-((4-methyl-2-oxo-2H-chromen-7-yl)amino)-1-oxo-4-phenylbutan-2-yl)amino)-1-oxopentan-2-yl)carbamate.* A round bottom flask charged with <sup>+</sup>H<sub>3</sub>N-L-homophenylalanine • TFA (120 mg, 0.266 mmol) and Cbz-Arginine (Mtr)-OH (180 mg, 0.346 mmol) was purged with N<sub>2</sub> gas yielding positive pressure. Anhydrous dichloromethane (10 mL) and was added followed by the addition of N,N-diisopropylethylamine (232 μL, 1.33 mmol). Propylphosphonic anhydride in a 50% wt. solution of ethyl acetate (317 μL, 0.532 mmol) was added dropwise at 0°C resulting in a yellow color. The reaction was allowed to react for 3 hours and no starting material remained via TLC (3:1 hexanes:ethyl acetate v/v) and LC-MS analysis. Solvents were removed and the yellow oil was solubilized in DCM (~40 mL) and washed with water (10 mL, 4x) and brine (10 mL, 1x). The organic layer was dried over Na<sub>2</sub>SO<sub>4</sub> and solvents removed under reduced pressure to yield a yellow solid that was moved directly to the next step. LC-MS Rt: 5.73 min, *m/z* 837.9 ([M+H]<sup>+</sup>, C<sub>43</sub>H<sub>48</sub>N<sub>6</sub>O<sub>9</sub>S<sup>+</sup> Calcd 837.3.

*(S10) Cbz-L-arginine-L-homophenylalanine-AMC: benzyl ((S)-5-guanidino-1-(((S)-1-((4-methyl-2-oxo-2H-chromen-7-yl)amino)-1-oxo-4-phenylbutan-2-yl)amino)-1-oxopentan-2-yl)carbamate.* A round bottom flask charged with Cbz-Arginine (Mtr)-L-homophenylalanine-AMC (130 mg, 0.158 mmol) and phenol (450 mg, 4.8 mmol, 5% wt/v) was purged with N<sub>2</sub> gas yielding positive pressure. Trifluoroacetic acid (6

mL) and was added followed by allowing the reaction to proceed for 12 hours. The solvent was removed under a flow of N<sub>2</sub> gas and the crude product was subsequently purified by preparative HPLC to yield (34 mg, 34% yield) as a white powder. <sup>1</sup>H NMR (400 MHz, MeOD) δ 1.58 – 2.00 (m, 4H), 2.00 – 2.33 (m, 2H), 2.34 – 2.53 (m, 3H), 2.52 – 2.84 (m, 2H), 3.20 (q, *J* = 6.3, 5.8 Hz, 2H), 4.23 (t, *J* = 6.5 Hz, 1H), 4.50 (dd, *J* = 9.2, 4.9 Hz, 1H), 5.13 (s, 2H), 6.23 (t, *J* = 5.5 Hz, 1H), 6.90 – 7.41 (m, 10H), 7.47 (d, *J* = 8.7 Hz, 1H), 7.66 (dt, *J* = 18.0, 8.3 Hz, 1H), 7.84 (d, *J* = 11.3 Hz, 1H), 8.53 (s, 1H). LC-MS Rt: 3.62 min, *m/z* 625.5 ([M+H]<sup>+</sup>, C<sub>34</sub>H<sub>38</sub>N<sub>6</sub>O<sub>6</sub><sup>-</sup> Calcd 625.3).

(S11) *NMe-Pip-Phe-Phe-AMC*: 4-methyl-*N*-((*S*)-1-(((*S*)-1-((4-methyl-2-oxo-2*H*-chromen-7-yl)amino)-1-oxo-3-phenylpropan-2-yl)amino)-1-oxo-3-phenylpropan-2-yl)piperazine-1-carboxamide. A round bottom flask charged with <sup>3</sup>H<sub>3</sub>N-L-phenylalanine •TFA (100 mg, 0.29 mmol) and *N*-methyl-piperazine-phenylalanine-OH (160 mg, 0.55 mmol) was purged with N<sub>2</sub> gas yielding positive pressure. Anhydrous dichloromethane (15 mL) and was added followed by the addition of *N,N*-diisopropylethylamine (253 μL, 1.45 mmol). Propylphosphonic anhydride in a 50% wt. solution of ethyl acetate (345 μL, 0.58 mmol) was added dropwise at 0°C resulting in a yellow color. The reaction was allowed to react for 45 minutes and no starting material remained via TLC (1:1 hexanes:ethyl acetate v/v) and LC-MS analysis. Solvents were removed and the yellow oil was solubilized in dichloromethane (~40 mL) and washed with water (10 mL, 4x) and brine (10 mL, 1x). The organic layer was dried over Na<sub>2</sub>SO<sub>4</sub> and solvents removed under reduced pressure to yield a yellow solid. The crude amide was purified via preparative HPLC to yield (24.6 mg, 14%) <sup>1</sup>H NMR (400 MHz, CDCl<sub>3</sub>) δ 2.38 (d, *J* = 1.2 Hz, 3H), 2.54 (s, 3H), 2.55 – 2.78 (m, 4H), 2.81 – 3.04 (m, 1H), 3.02 – 3.28 (m, 3H), 3.32 – 3.60 (m, 4H), 4.47 (dt, *J* = 8.7, 5.5 Hz, 1H), 4.87 (q, *J* = 6.9 Hz, 1H), 5.65 (d, *J* = 5.7 Hz, 1H), 6.16 (d, *J* = 1.4 Hz, 1H), 6.83 – 7.40 (m, 15H), 7.46 (d, *J* = 8.7 Hz, 1H), 7.54 – 7.72 (m, 2H), 8.30 (s, 1H), 9.45 (s, 1H). LC-MS Rt: 3.15 min, *m/z* 596.2 ([M+H]<sup>+</sup>, C<sub>34</sub>H<sub>37</sub>N<sub>5</sub>O<sub>5</sub><sup>+</sup> Calcd 596.3).

Part 5. Structures of PVH Inhibitors 1-27

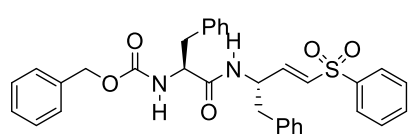

1

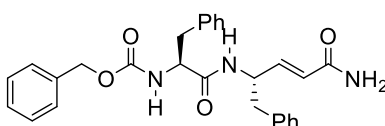

2

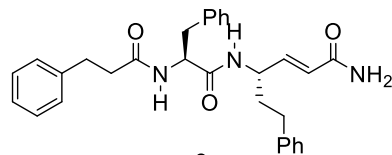

3

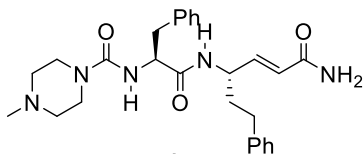

4

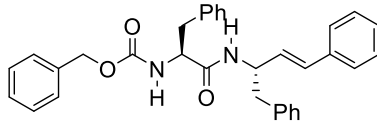

5

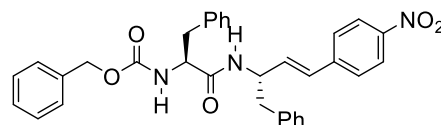

6

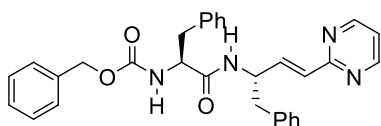

7

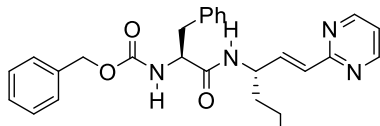

8

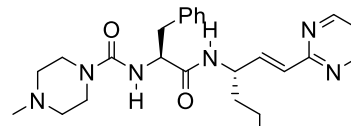

9

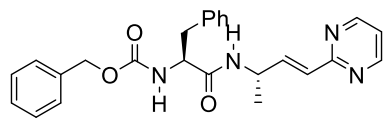

10

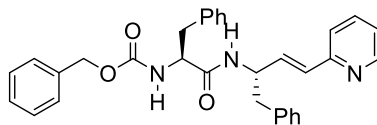

11

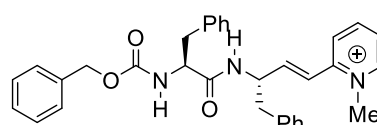

12

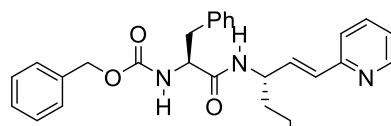

13

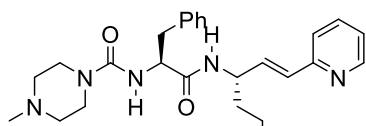

14

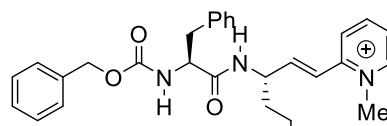

15

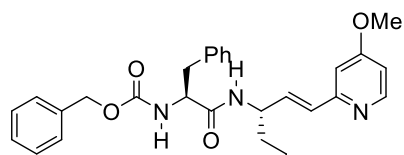

16

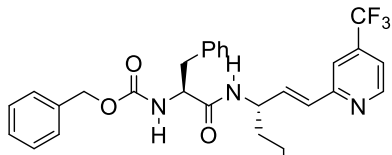

17

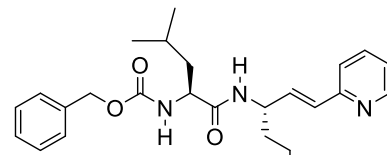

18

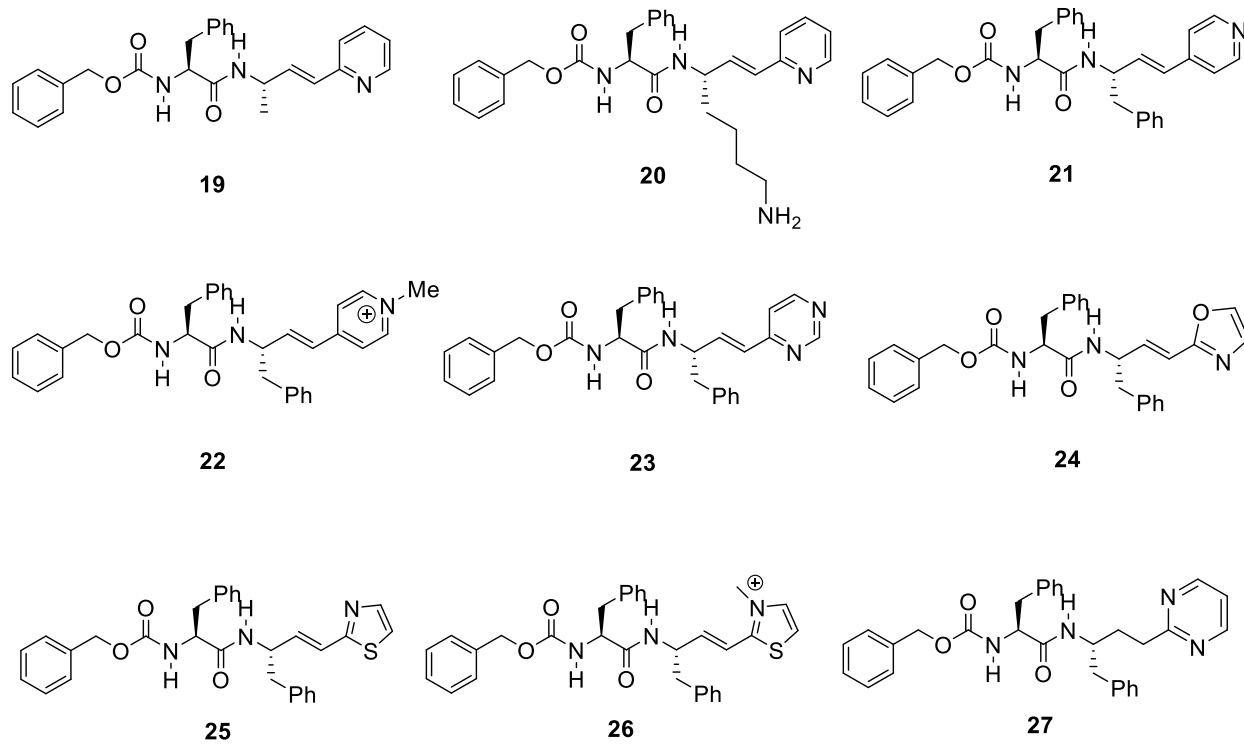

**Figure S3.** Structures of Inhibitors from Table 2 and Experimental Section.

## Part 6. HPLC Traces of Synthesized Substrates and Inhibitors

All cruzain substrates and inhibitors have been analyzed by LCMS, and have determined as >95% analytical purity as demonstrated in the chromatograms below.

S2:

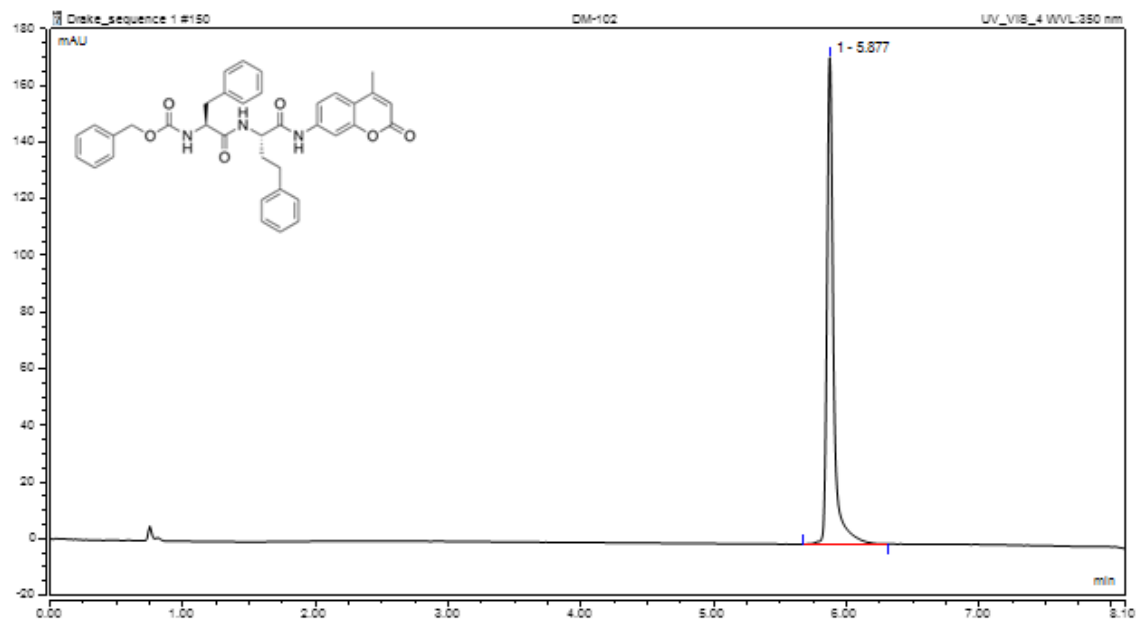

S3:

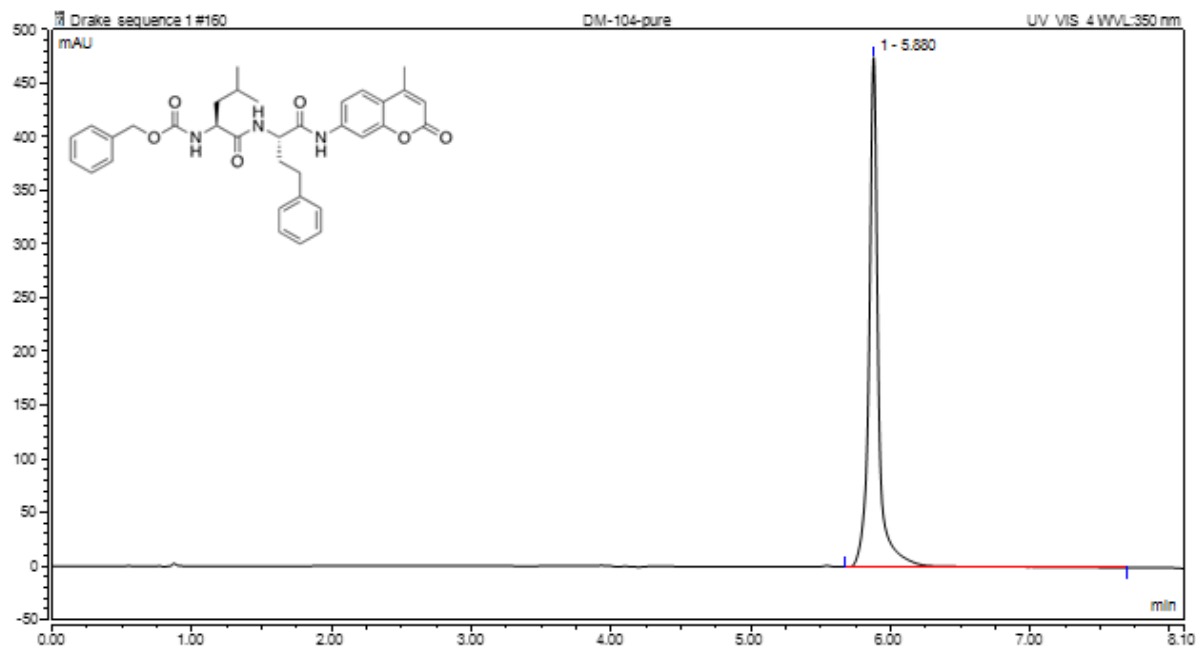



S5:

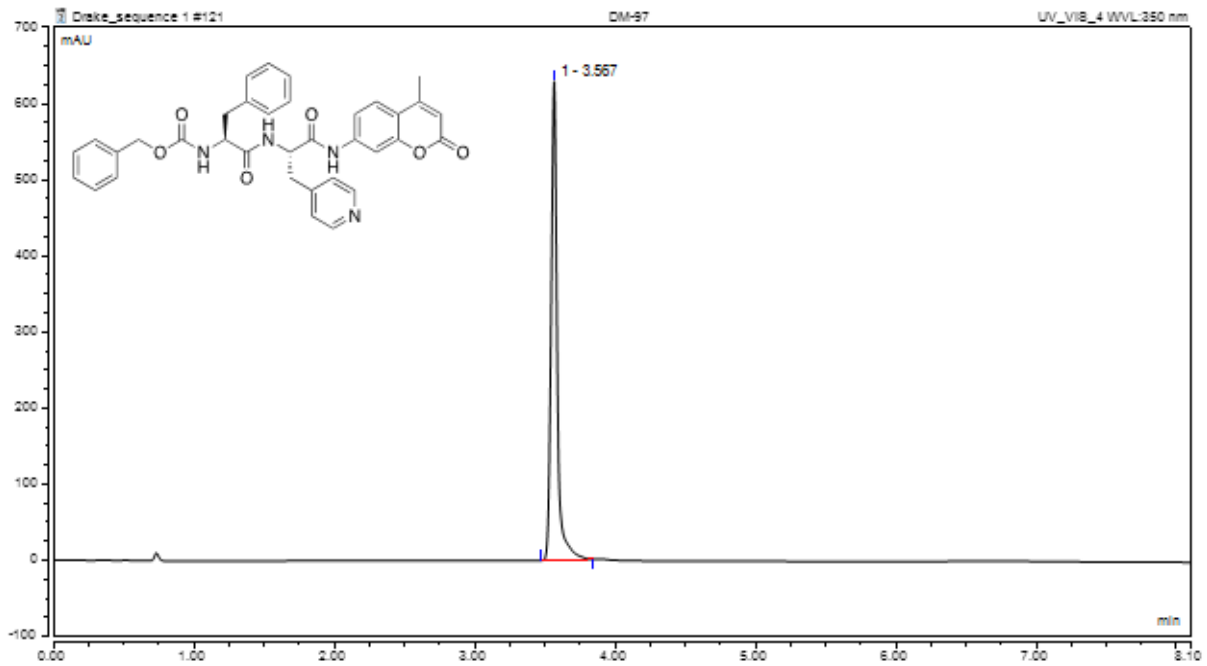

S7:

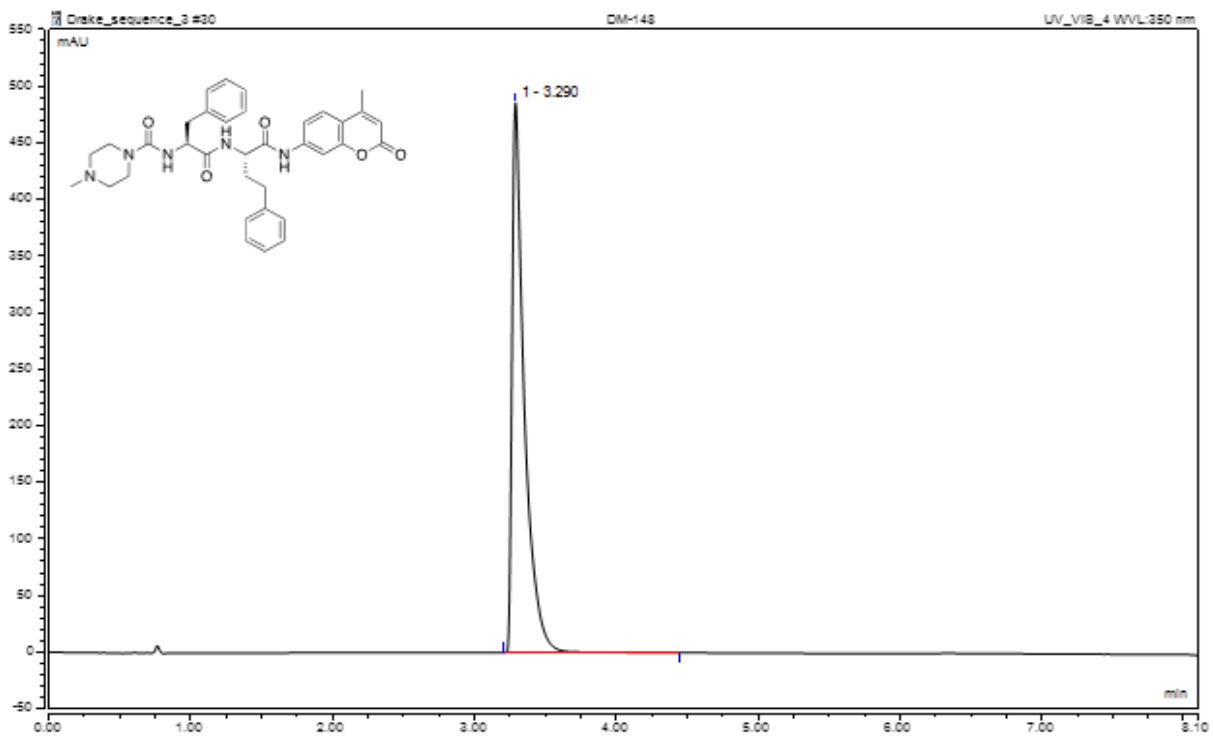

S8:

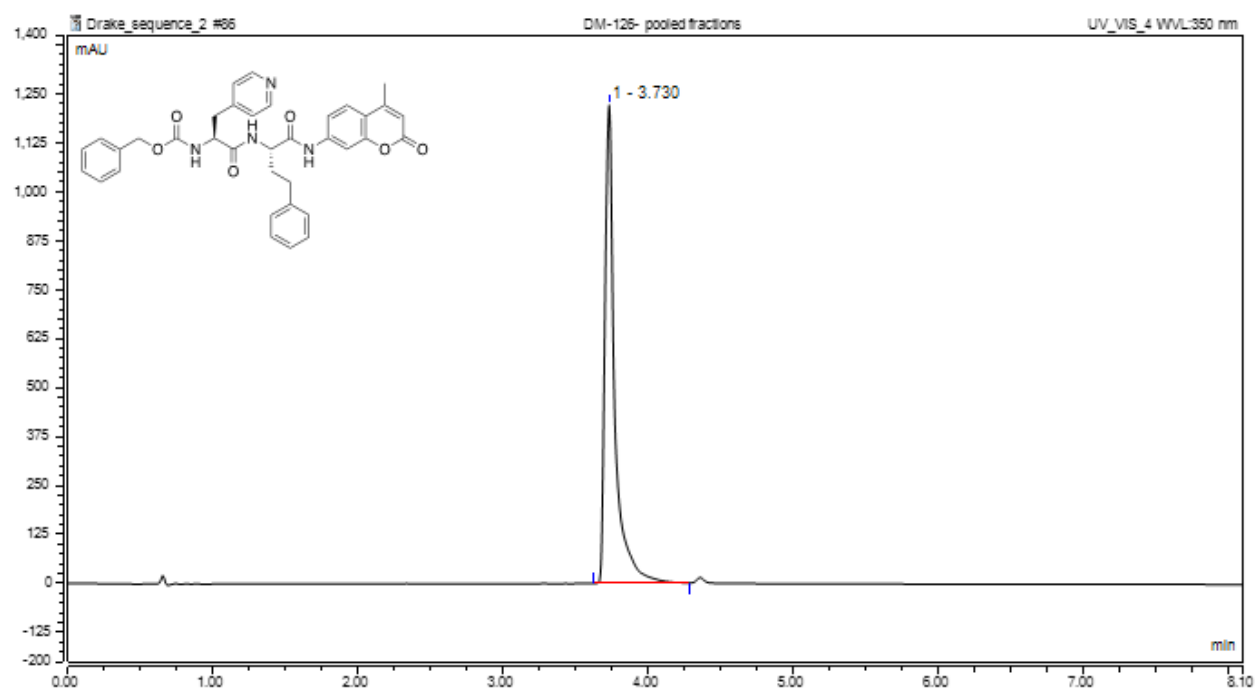

S9:

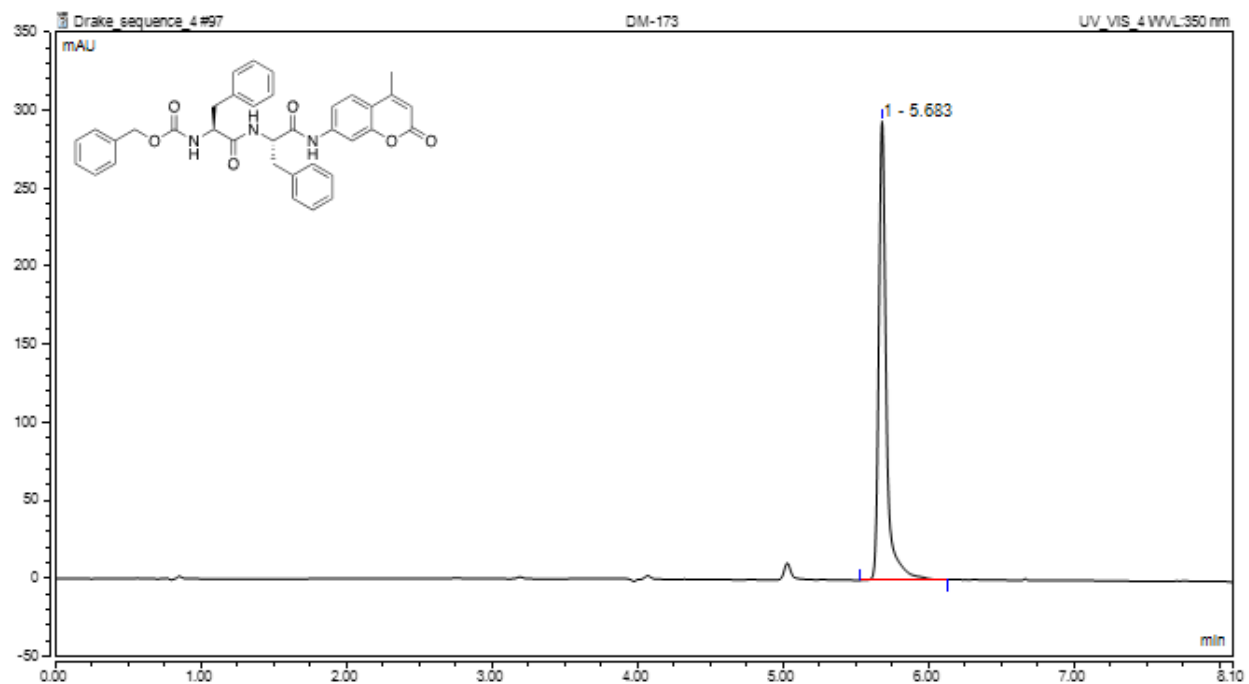

S10:

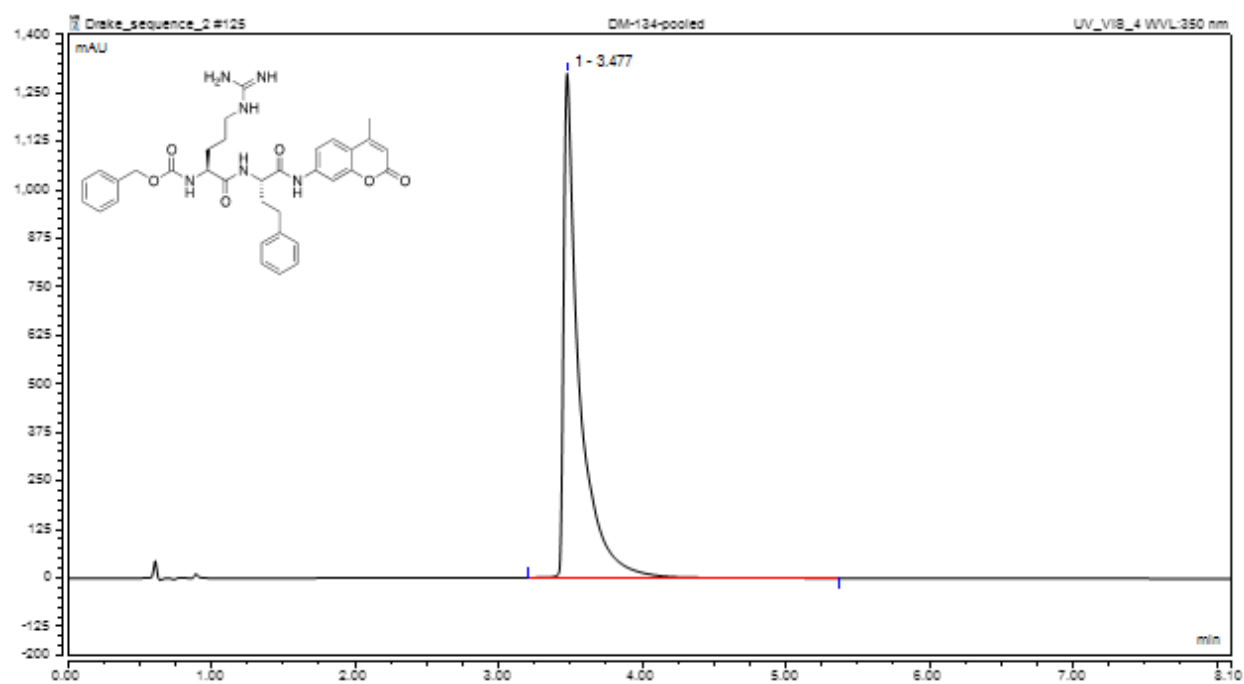

S11:

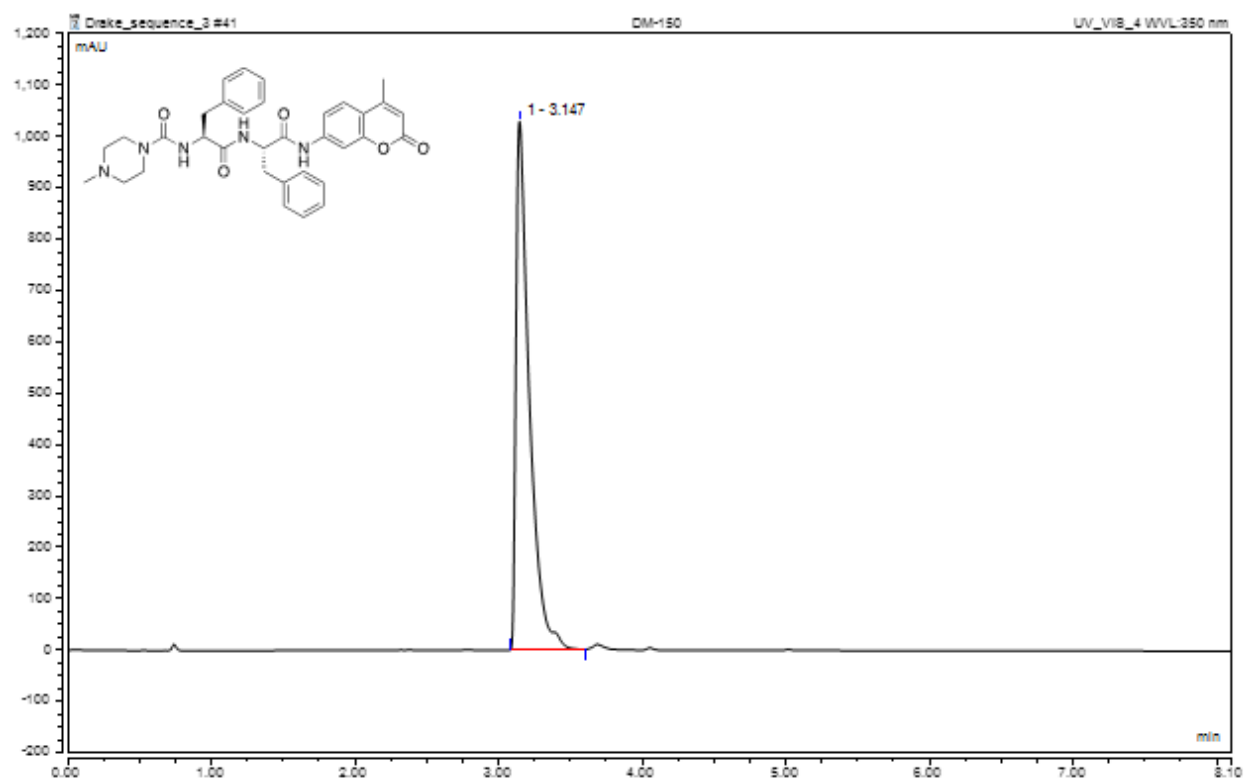

### Compound 1:

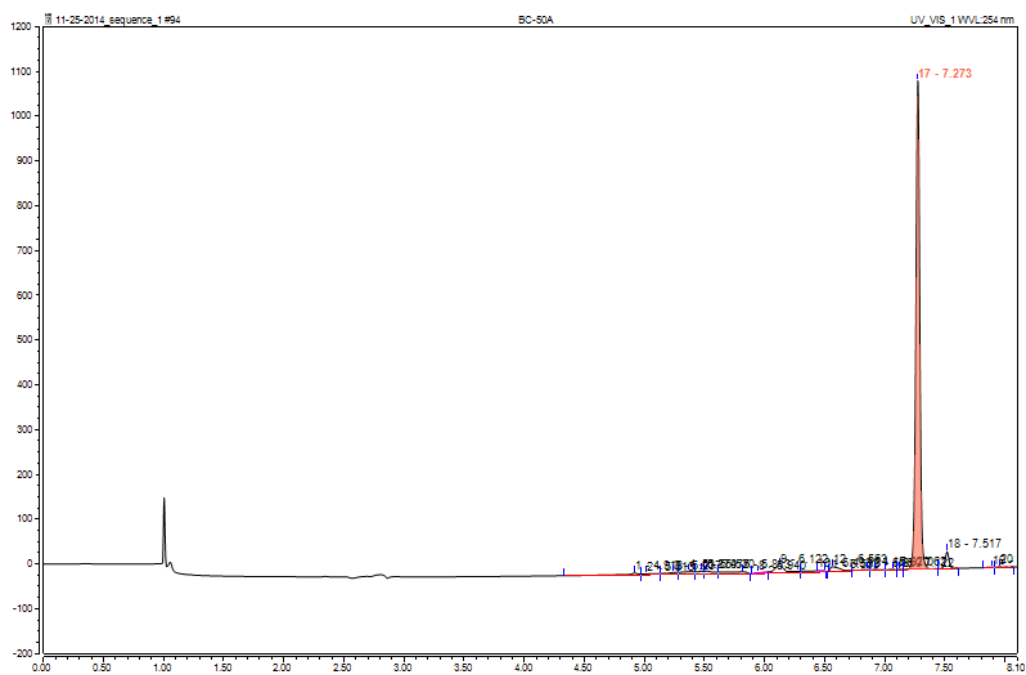

Compound 3:

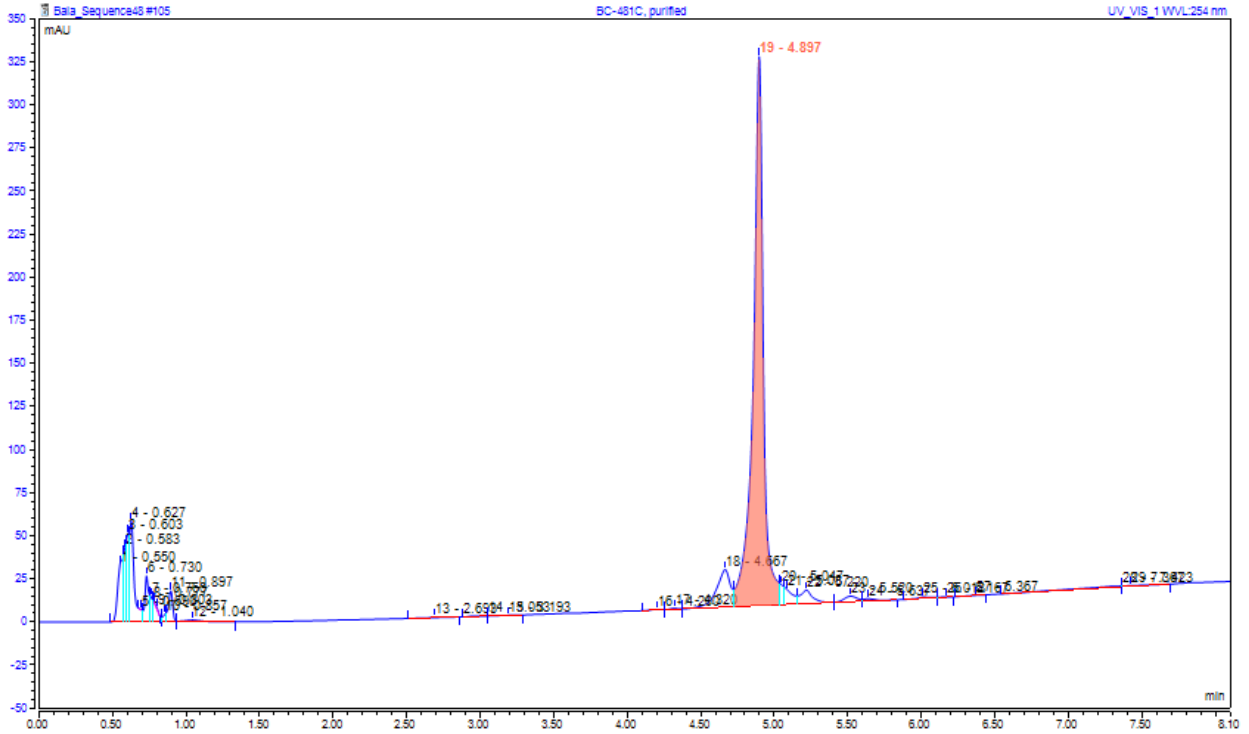

Compound 4:

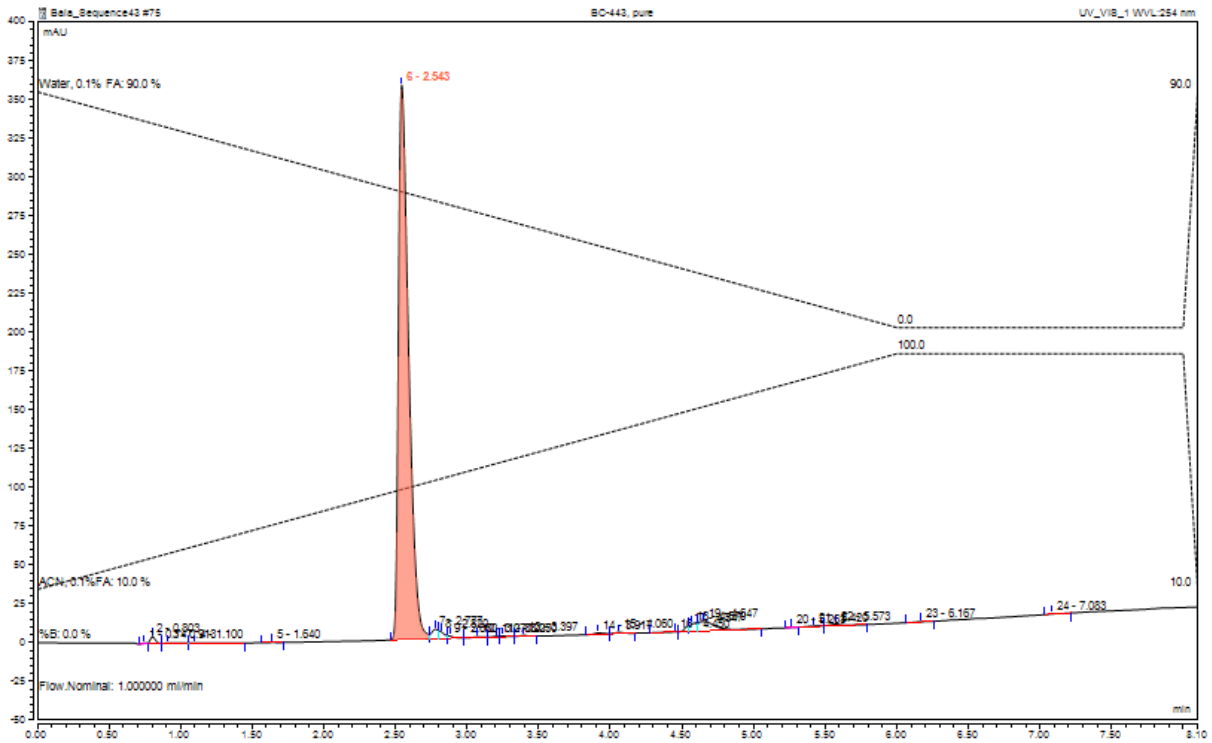

### Compound 5:

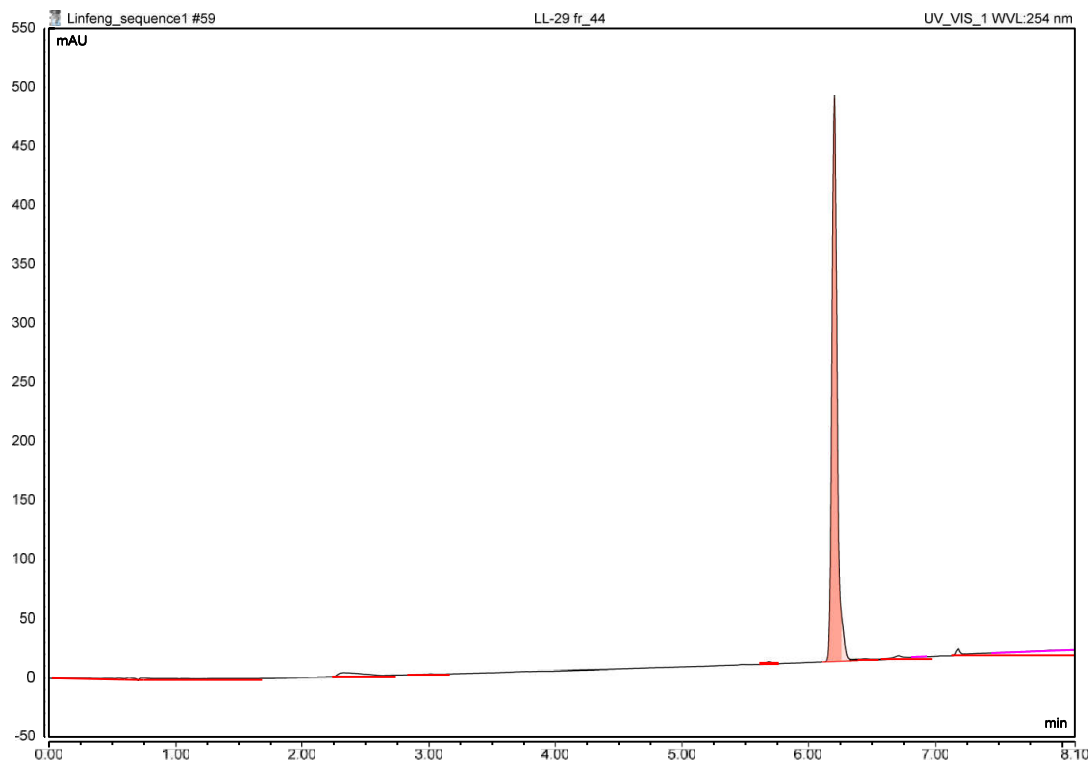

### Compound 6:

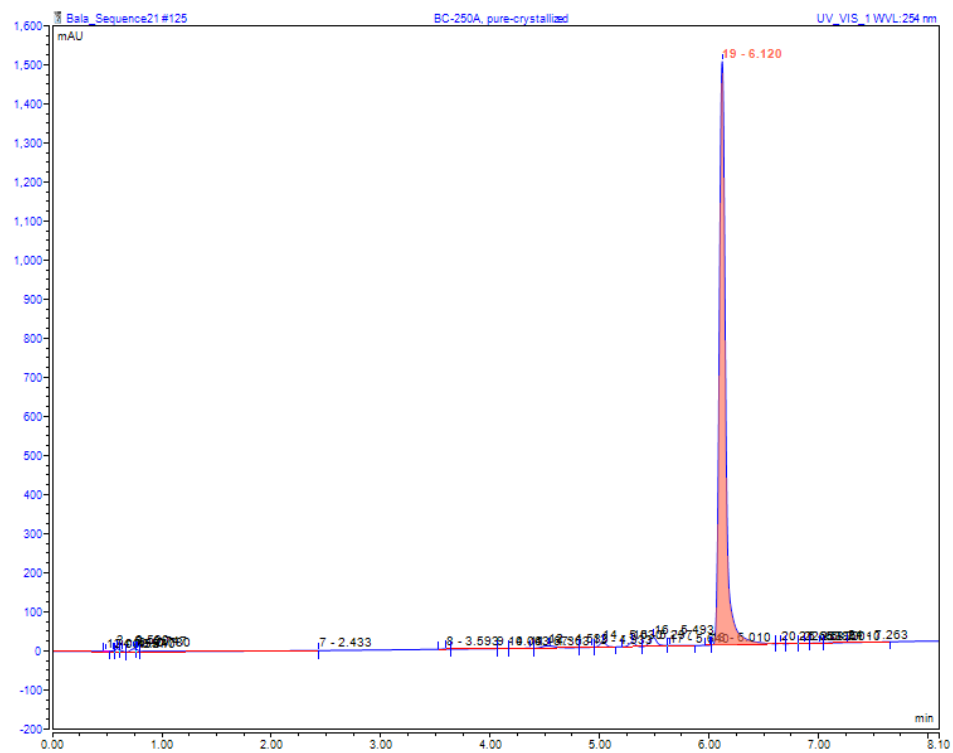

### Compound 7:

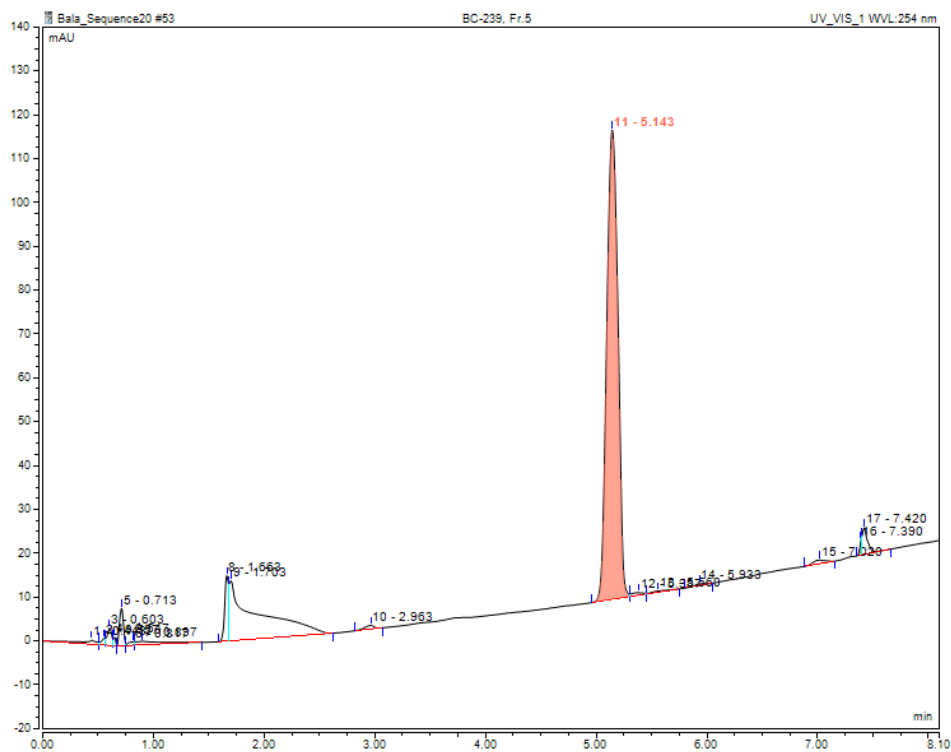

### Compound 8:

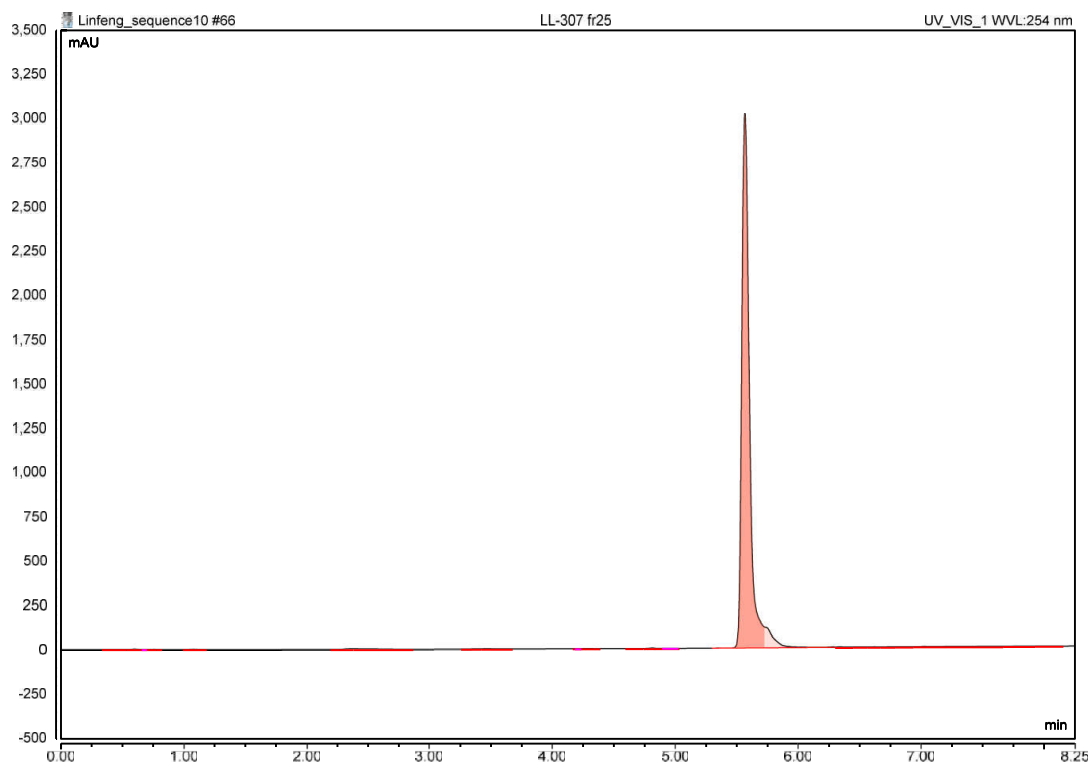

### Compound 9:

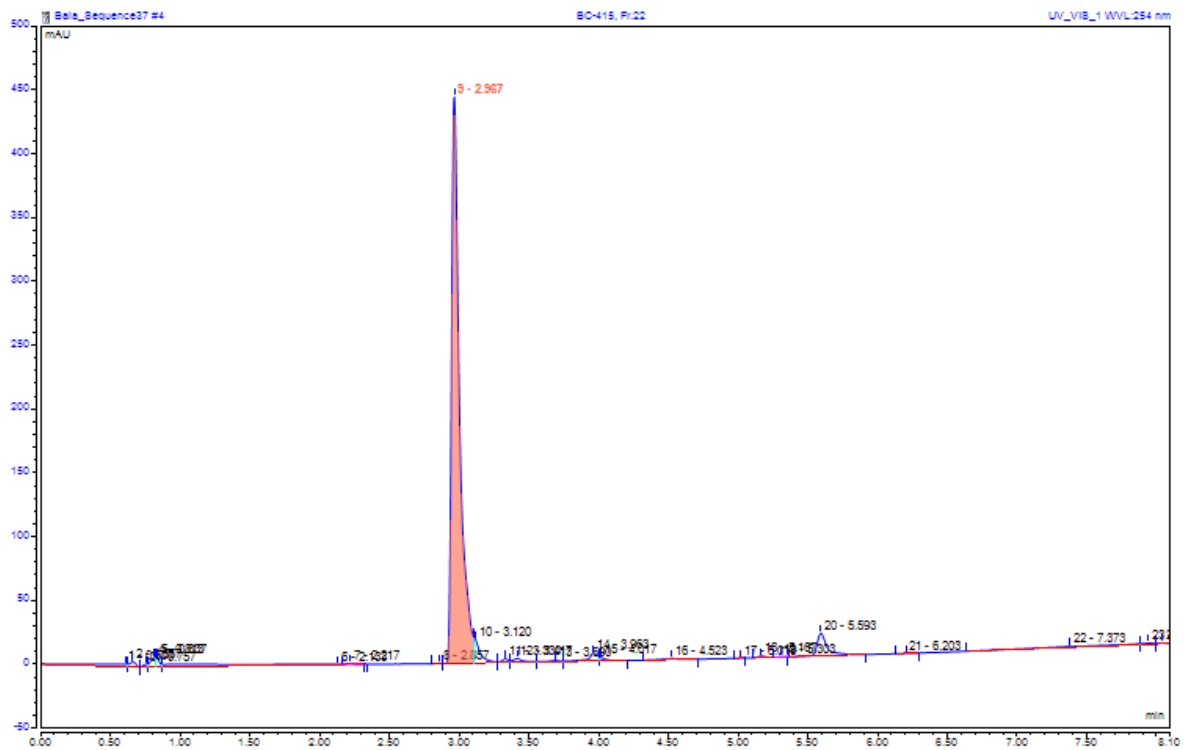

### Compound 10:

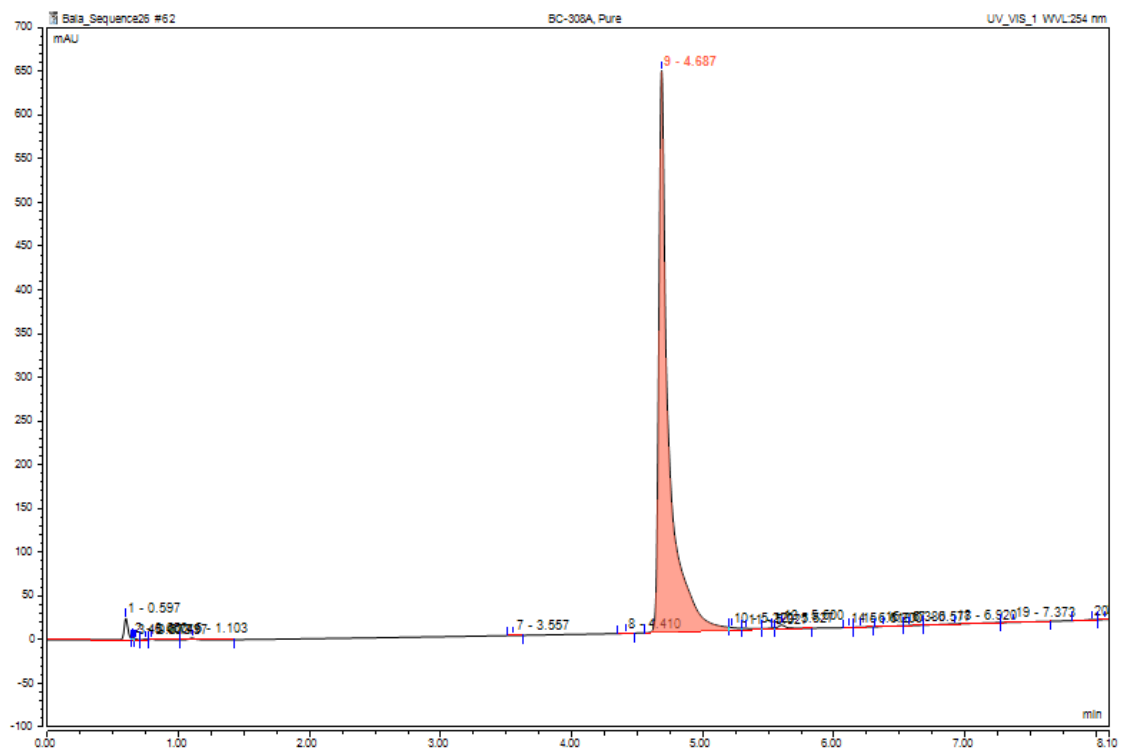



### Compound 11:

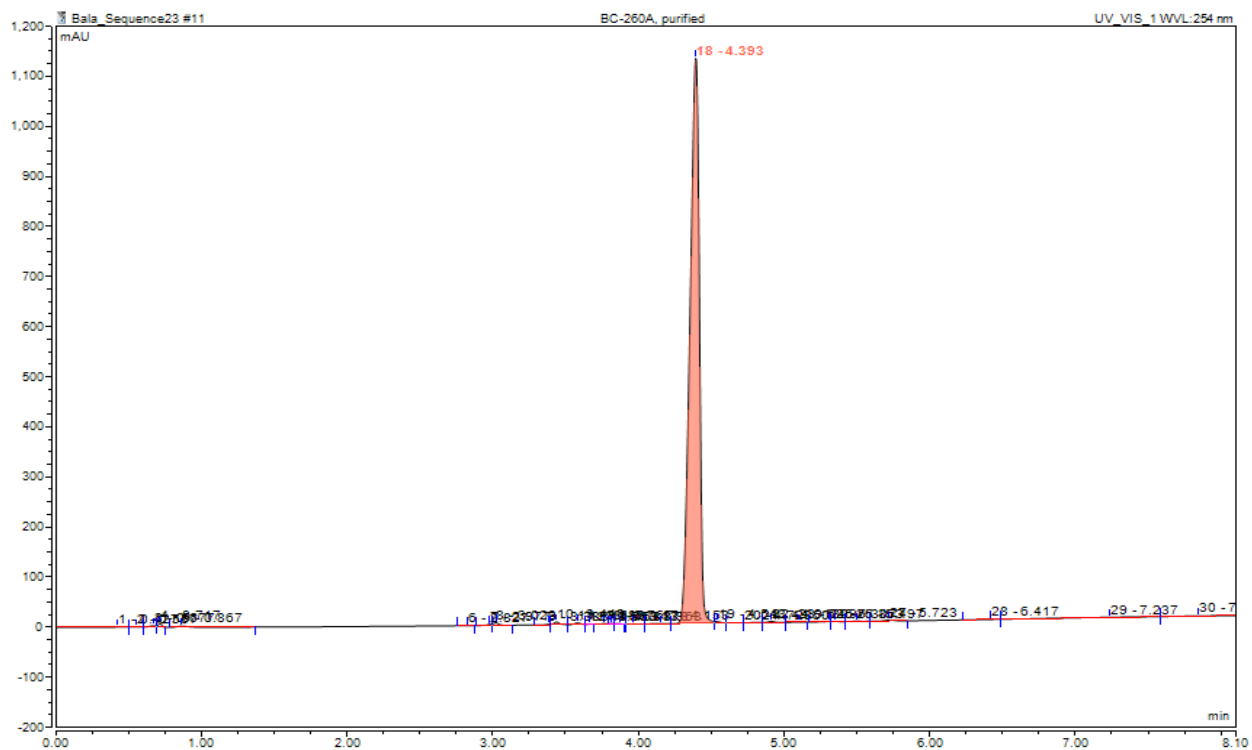

### Compound 12:

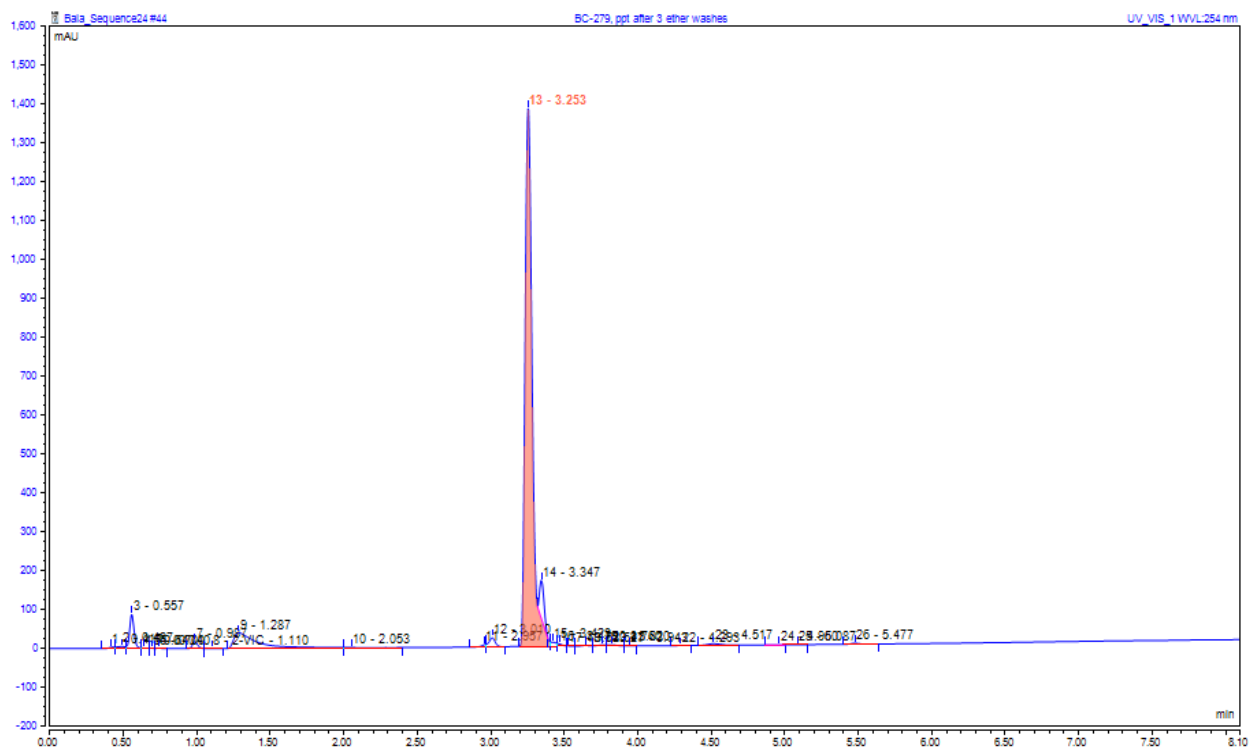

Compound 13:

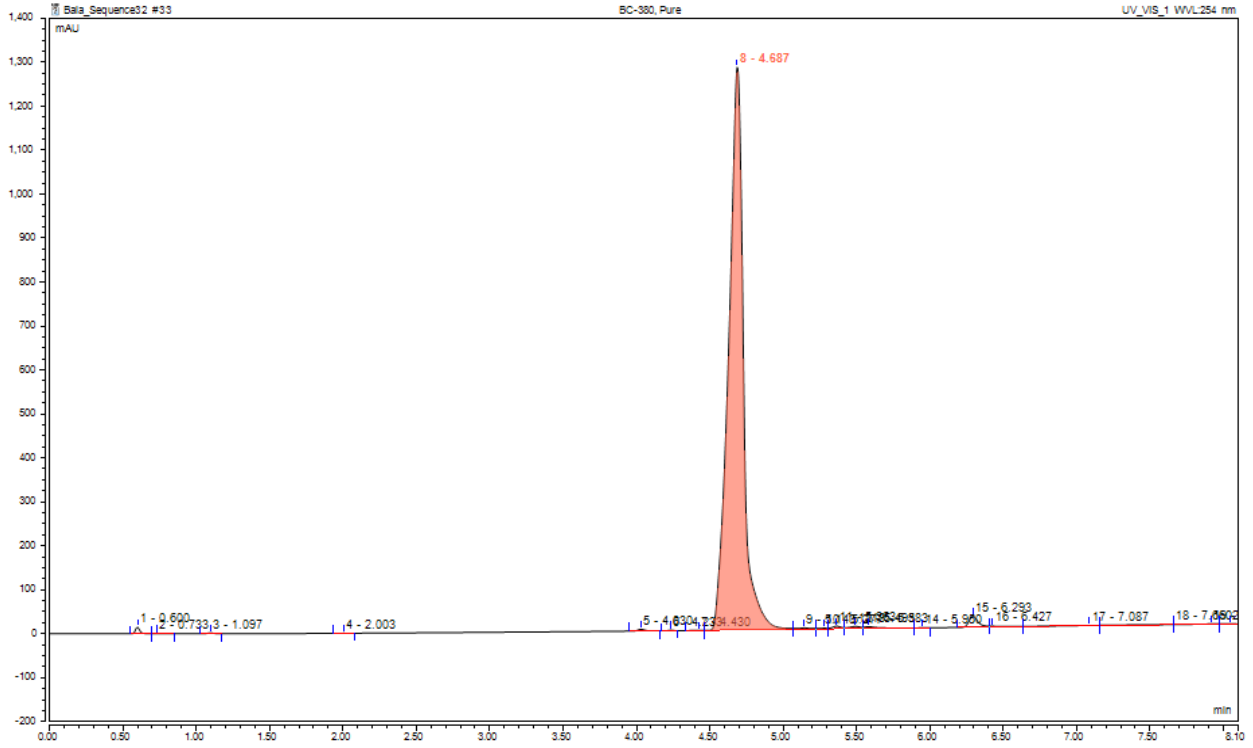

Compound 14:

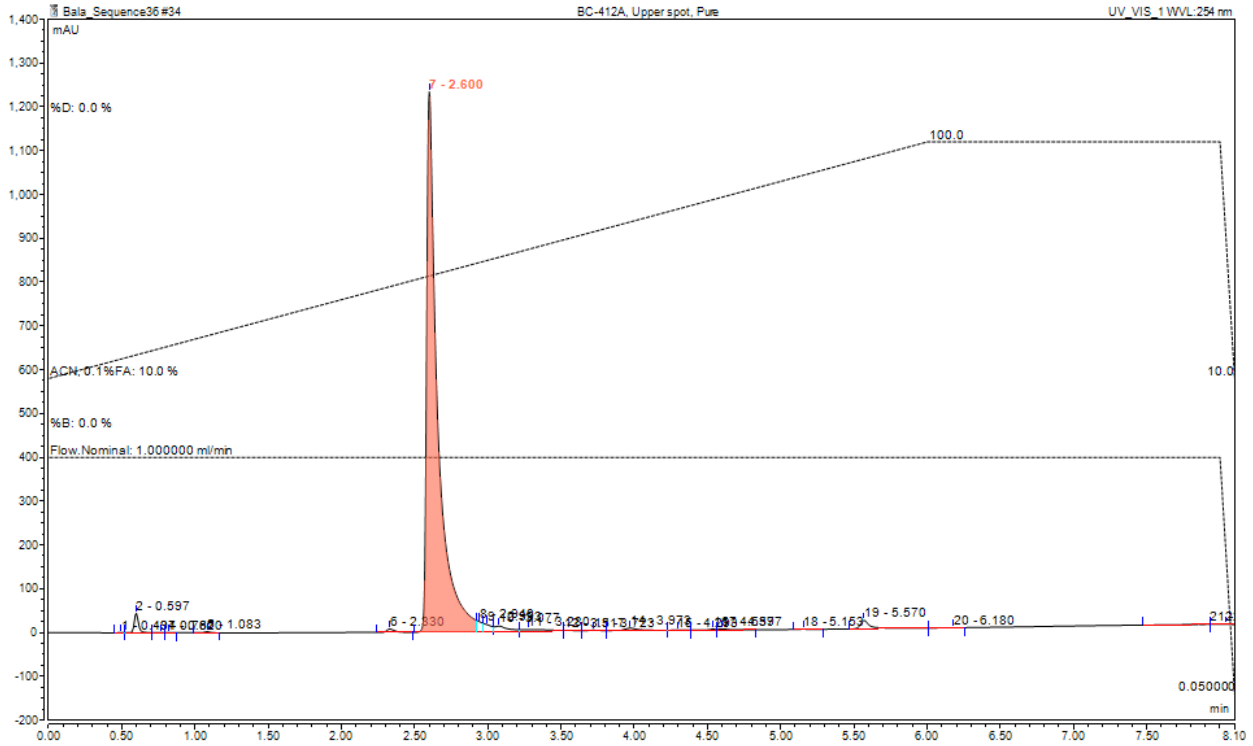

Compound 15:

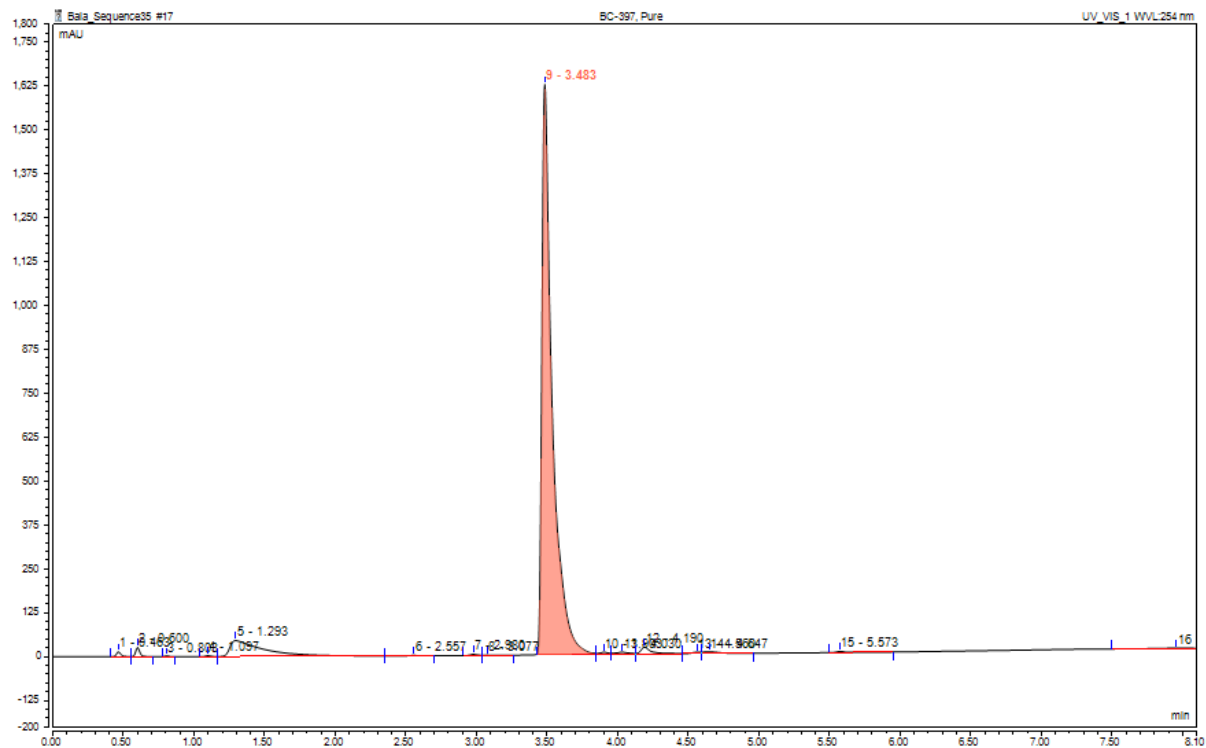

Compound 16:

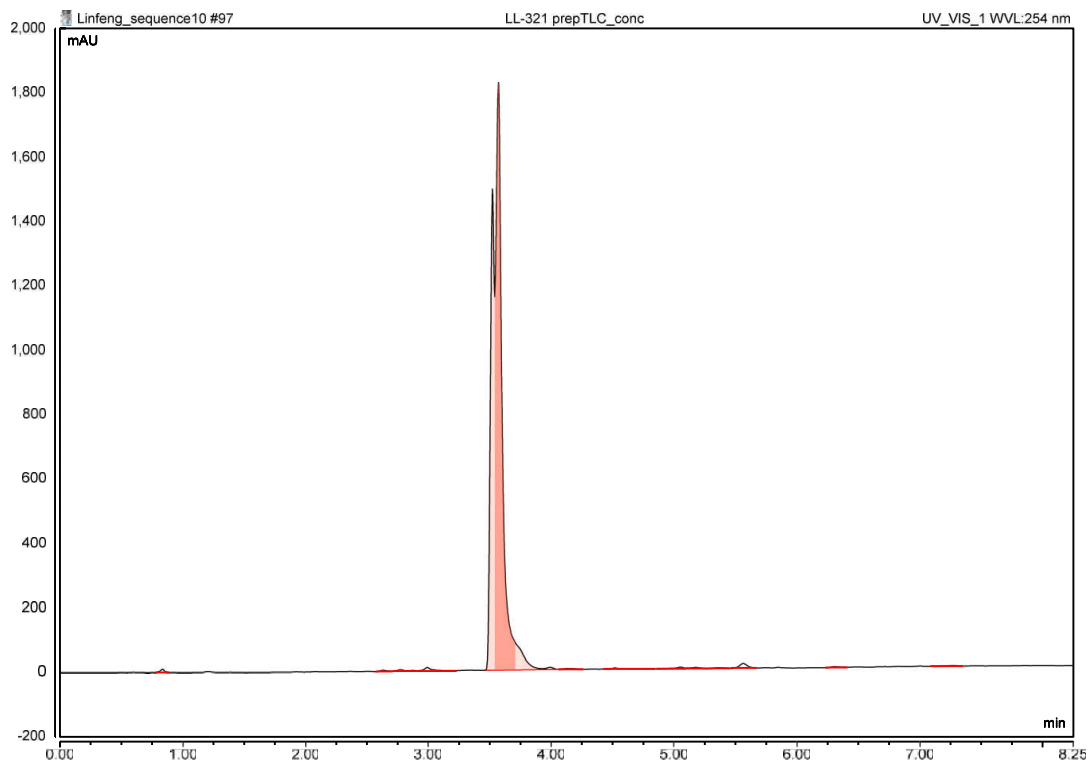

Compound 17:

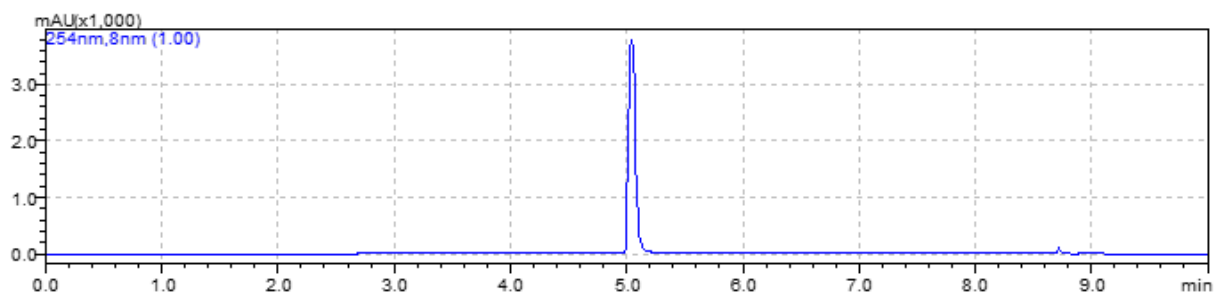

Compound 18:

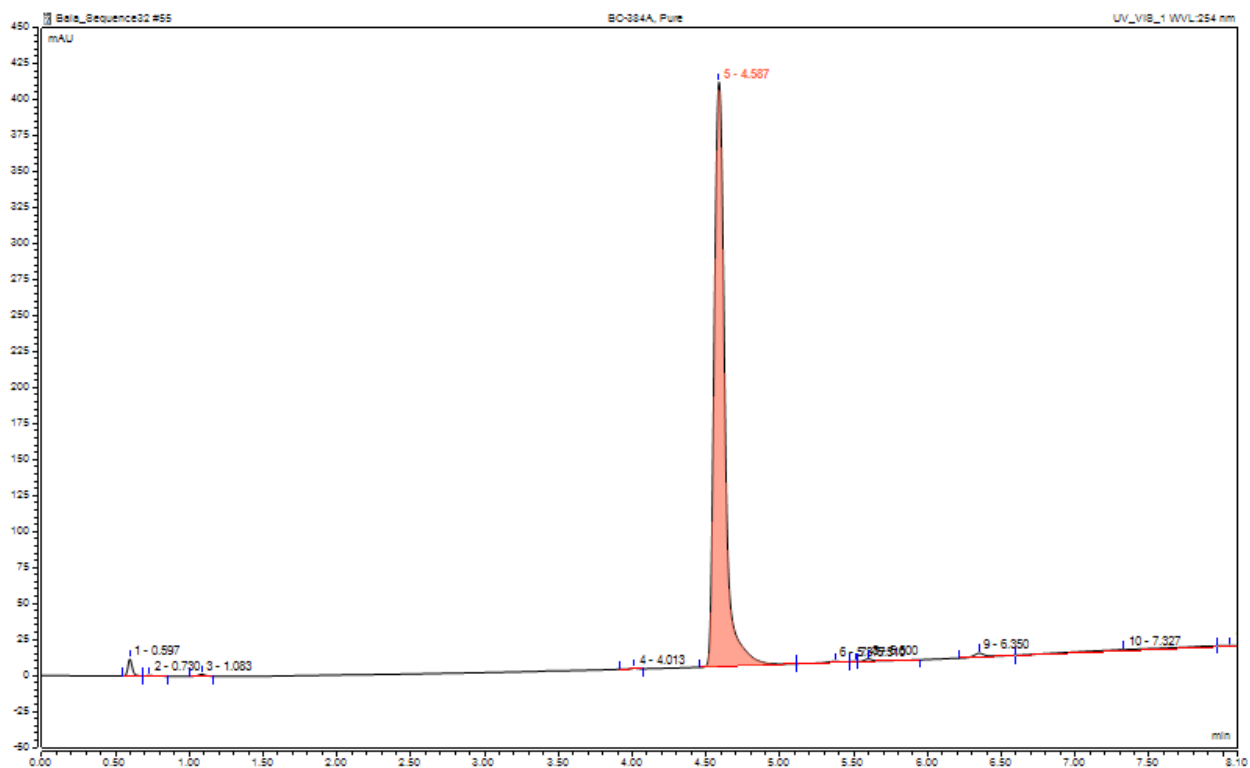

Compound 19:

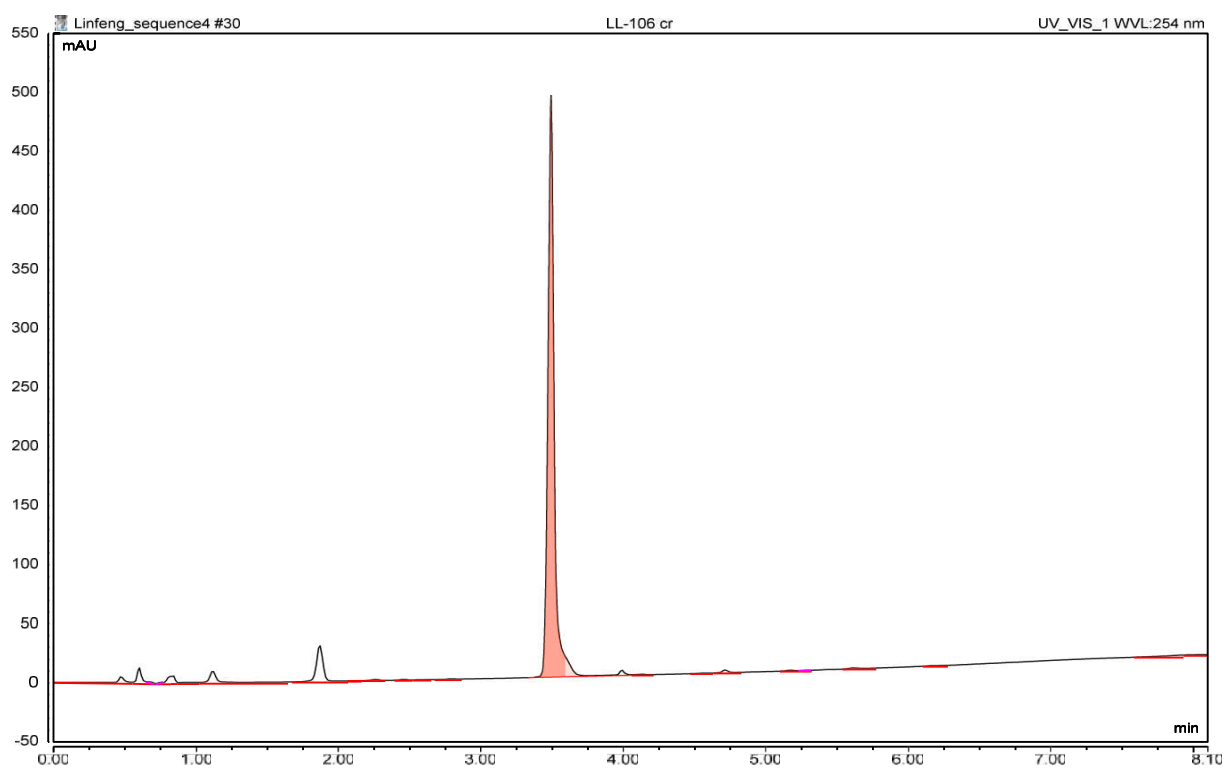

Compound 20:

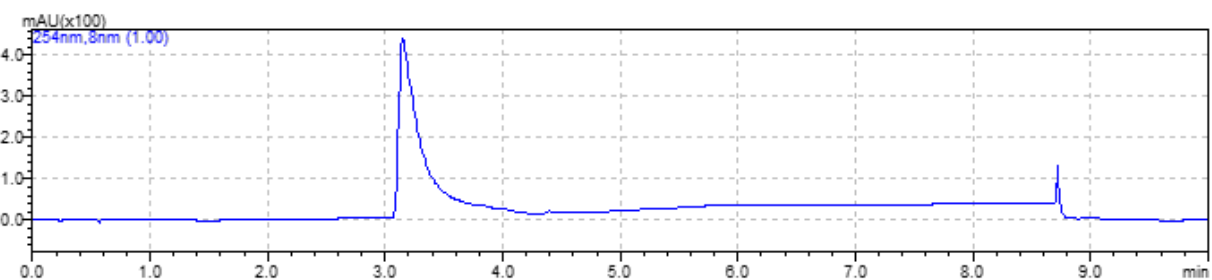

Compound 21:

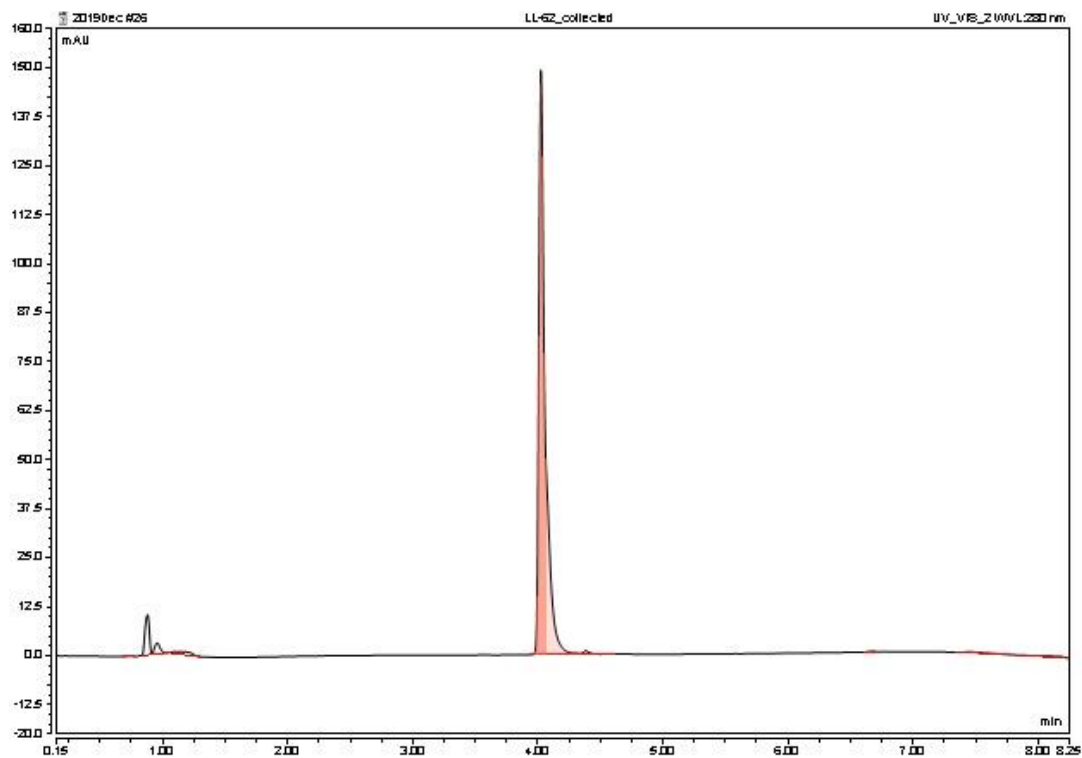

Compound 22:

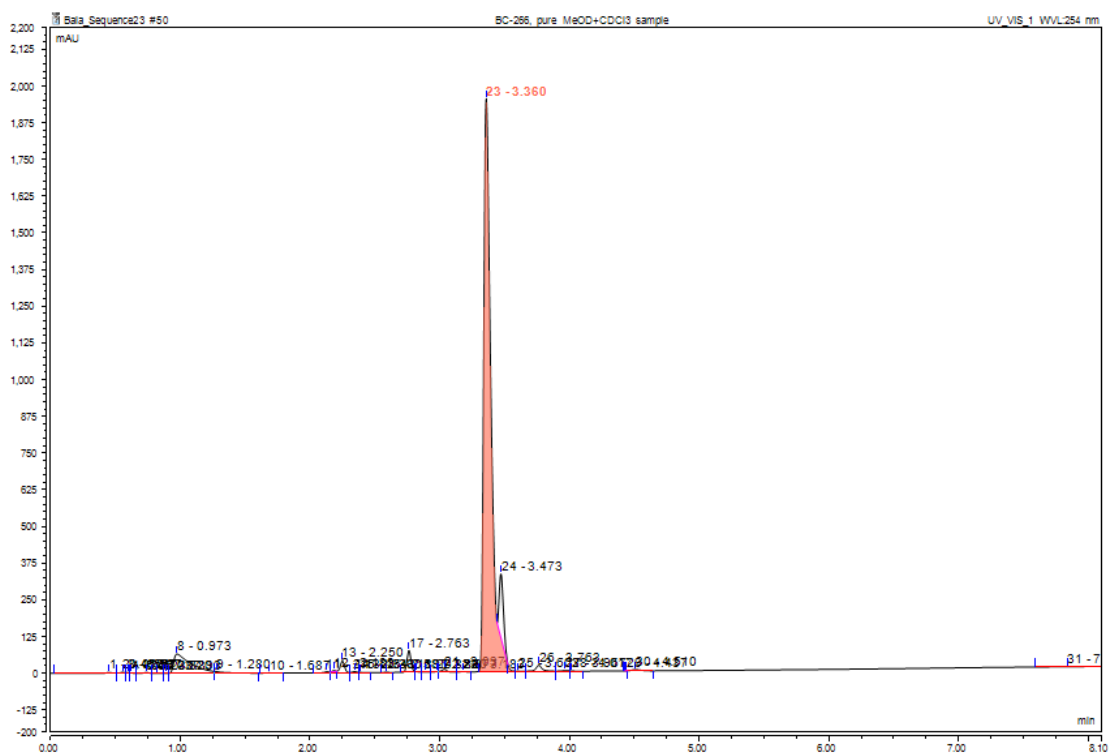



Compound 25:

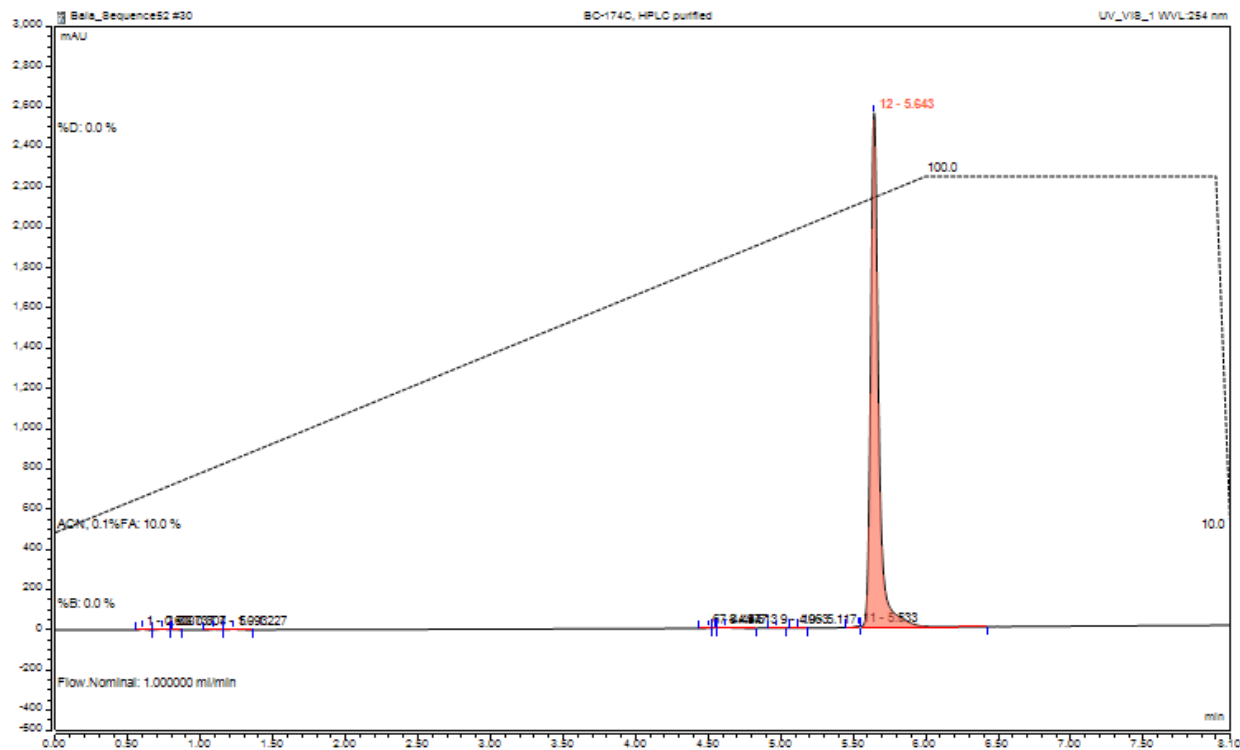



Compound 27:

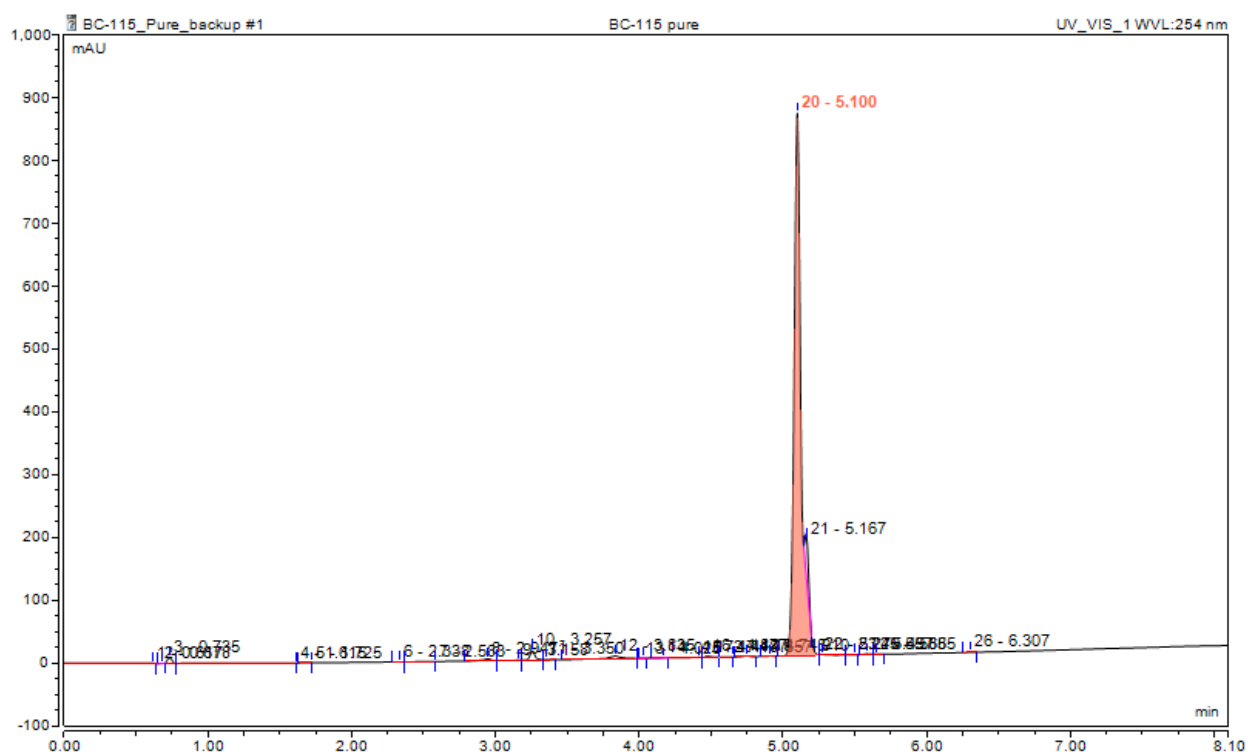

## Part 7. NMR Spectra of Synthesized Substrates and Inhibitors

S2:

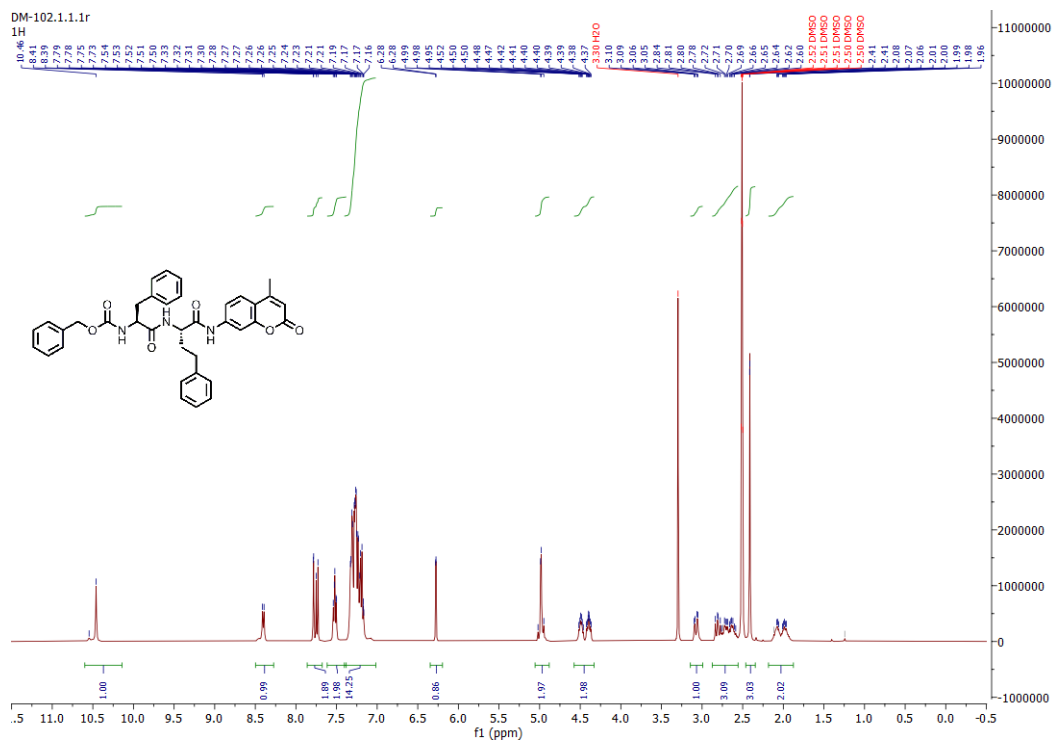

S3:

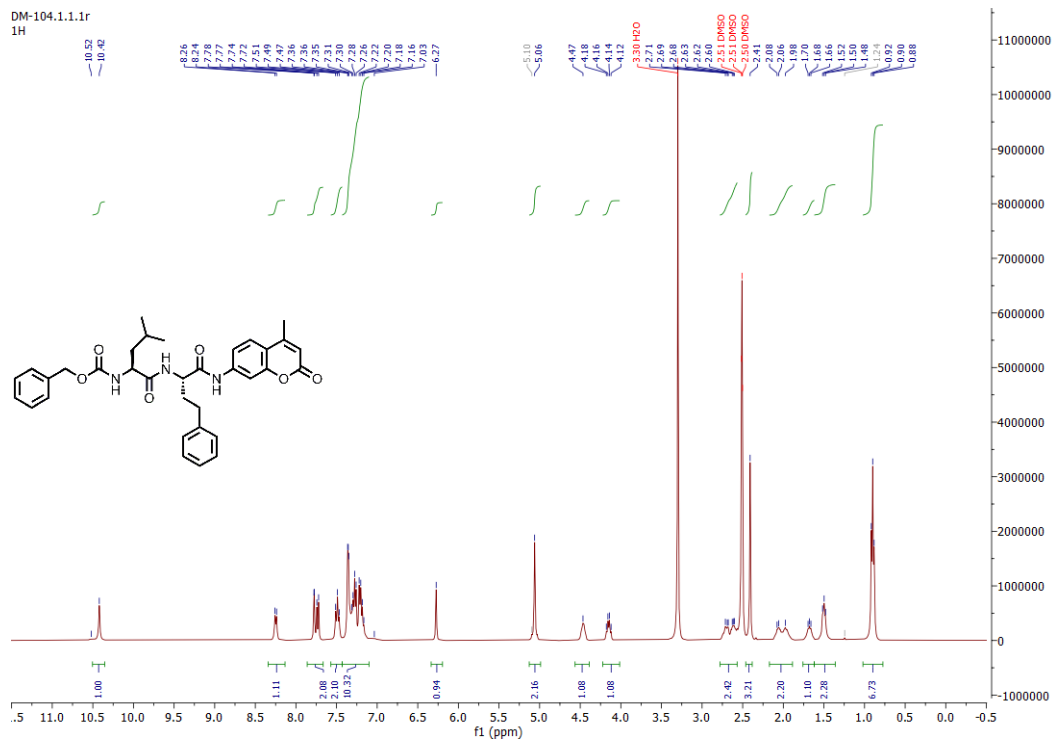

S5:

DM-97.1.1.1r  
1H

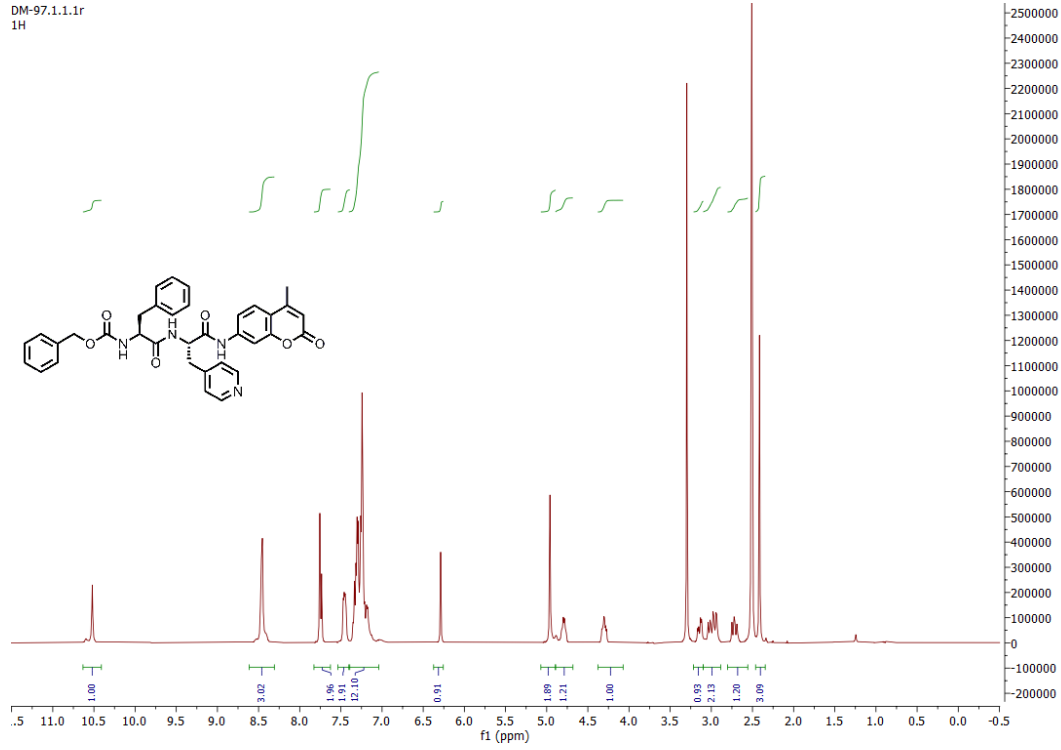

S7:

DM-148.1.fid  
1H

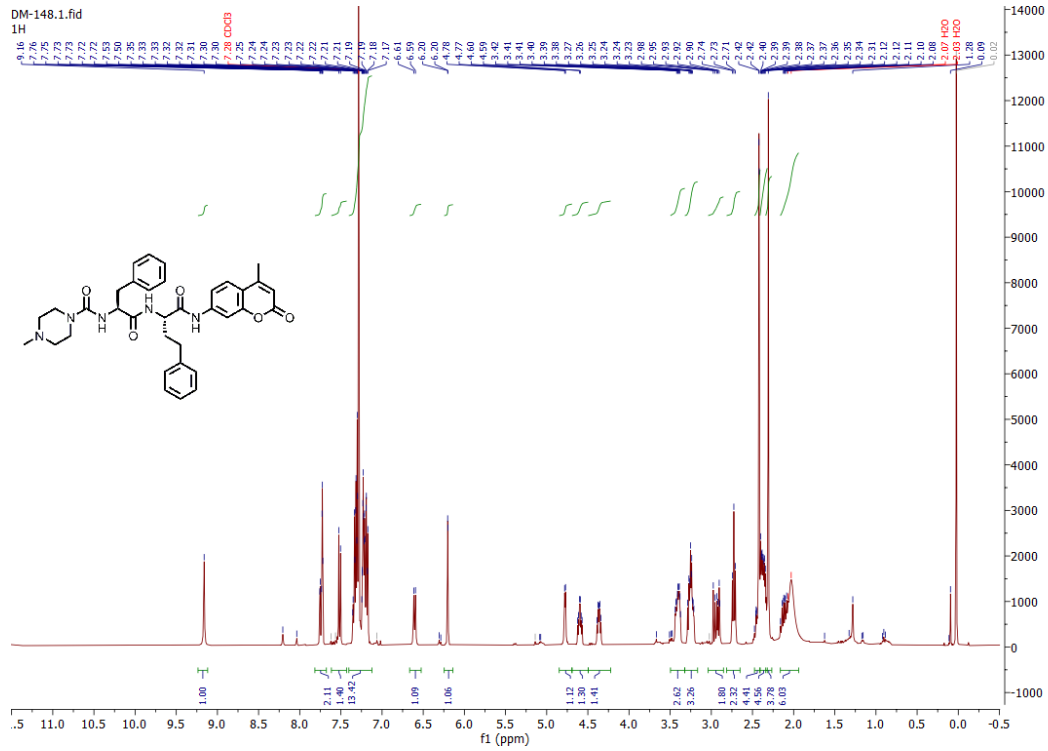





# <sup>1</sup>H NMR spectrum of compound 1

BC-50A 1HNMR, CDCl3

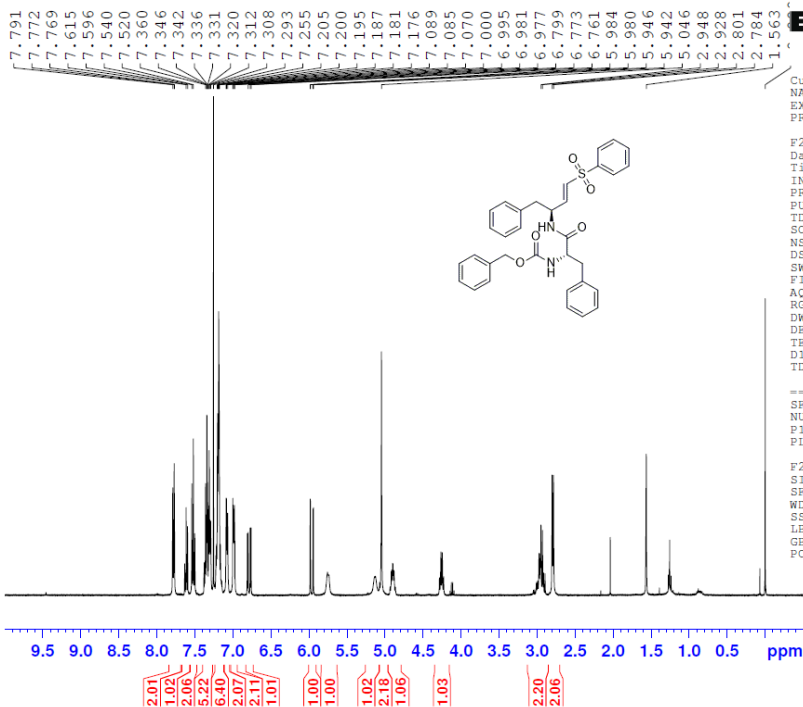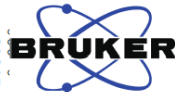

Current Data Parameters  
 NAME BC-50A  
 EXPNO 1  
 PROCNO 1

F2 - Acquisition Parameters  
 Date\_ 20150202  
 Time\_ 12.14  
 INSTRUM spect  
 PROBHD 5 mm PABBO BB/  
 PULPROG zg30  
 TD 65536  
 SOLVENT CDCl3  
 NS 16  
 DS 2  
 SWH 8012.820 Hz  
 FIDRES 0.122266 Hz  
 AQ 4.0894465 sec  
 RG 192.64  
 DW 62.400 usec  
 DE 6.50 usec  
 TE 305.0 K  
 D1 1.0000000 sec  
 TDO 1

==== CHANNEL f1 =====  
 SFO1 400.1324710 MHz  
 NUC1 1H  
 P1 10.00 usec  
 PLW1 26.00000000 W

F2 - Processing parameters  
 SI 65536  
 SF 400.1300114 MHz  
 WDW no  
 SSB 0  
 LB 0 Hz  
 GB 0  
 PC 1.00

# <sup>13</sup>C NMR spectrum of compound 1

BC-50A, C13 NMR, Pure, CDCl3  
 CARBON\_TAMU CDCl3 /data bala 35

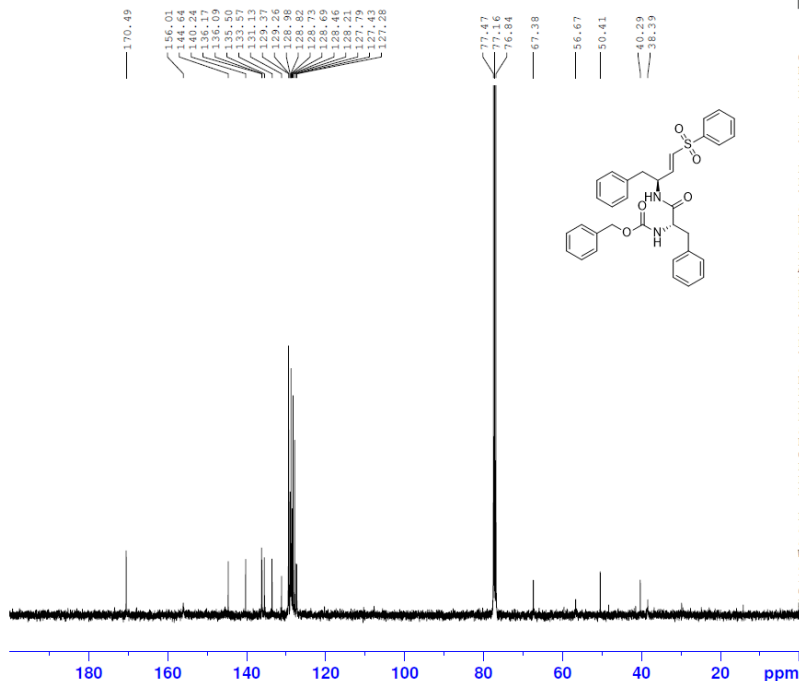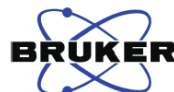

Current Data Parameters  
 NAME BC-50A  
 EXPNO 4  
 PROCNO 1

F2 - Acquisition Parameters  
 Date\_ 20200128  
 Time\_ 22.18 h  
 INSTRUM spect  
 PROBHD Z108618\_0577 ( )  
 PULPROG zgpg30  
 TD 65536  
 SOLVENT CDCl3  
 NS 1008  
 DS 4  
 SWH 24038.461 Hz  
 FIDRES 0.133596 Hz  
 AQ 1.3631488 sec  
 RG 192.64  
 DW 20.800 usec  
 DE 6.50 usec  
 TE 305.0 K  
 D1 3.0000000 sec  
 D11 0.0300000 sec  
 TDO 1

SFO1 100.6228298 MHz  
 NUC1 13C  
 P0 3.33 usec  
 P1 10.00 usec  
 PLW1 50.0000000 W  
 SFO2 400.1316005 MHz  
 NUC2 1H  
 CPDPRG2 waltz65  
 PCPD2 90.00 usec  
 PLW2 26.0000000 W  
 PLW12 0.38839999 W

F2 - Processing parameters  
 SI 32768  
 SF 100.6127564 MHz  
 WDW EM  
 SSB 0  
 LB 1.00 Hz  
 GB 0  
 PC 1.40



# <sup>1</sup>H NMR spectrum of compound 3

BC-481C, <sup>1</sup>H NMR, DMSO-d<sub>6</sub>

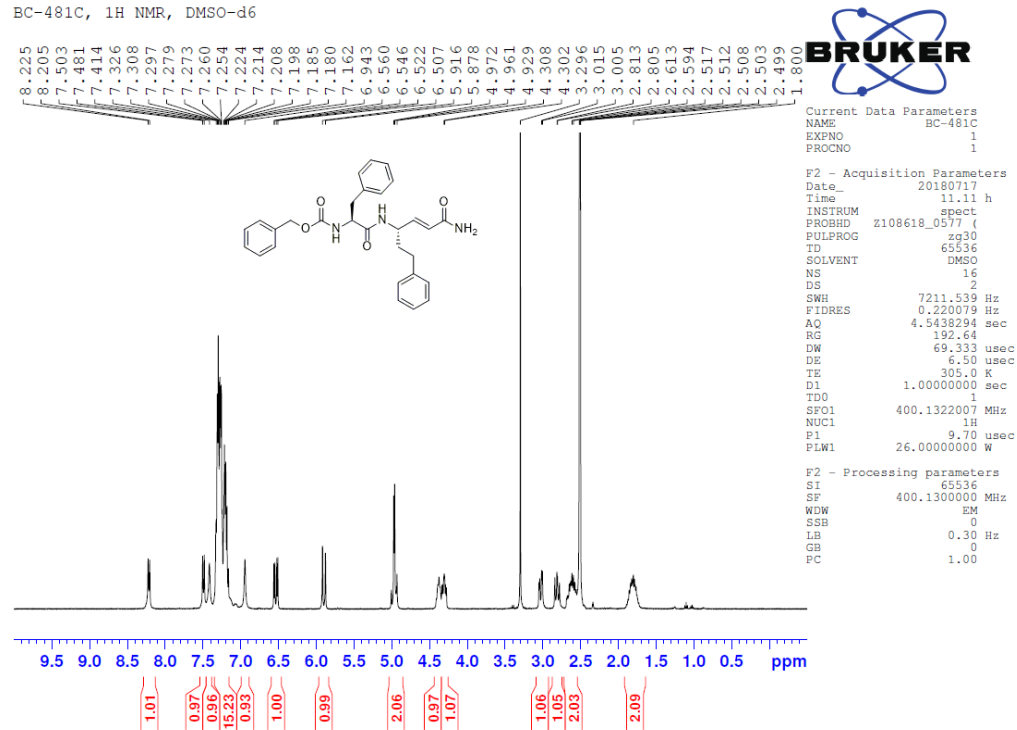



# <sup>1</sup>H NMR spectrum of compound 4

BC-443, purified <sup>1</sup>H NMR, CDCl<sub>3</sub>

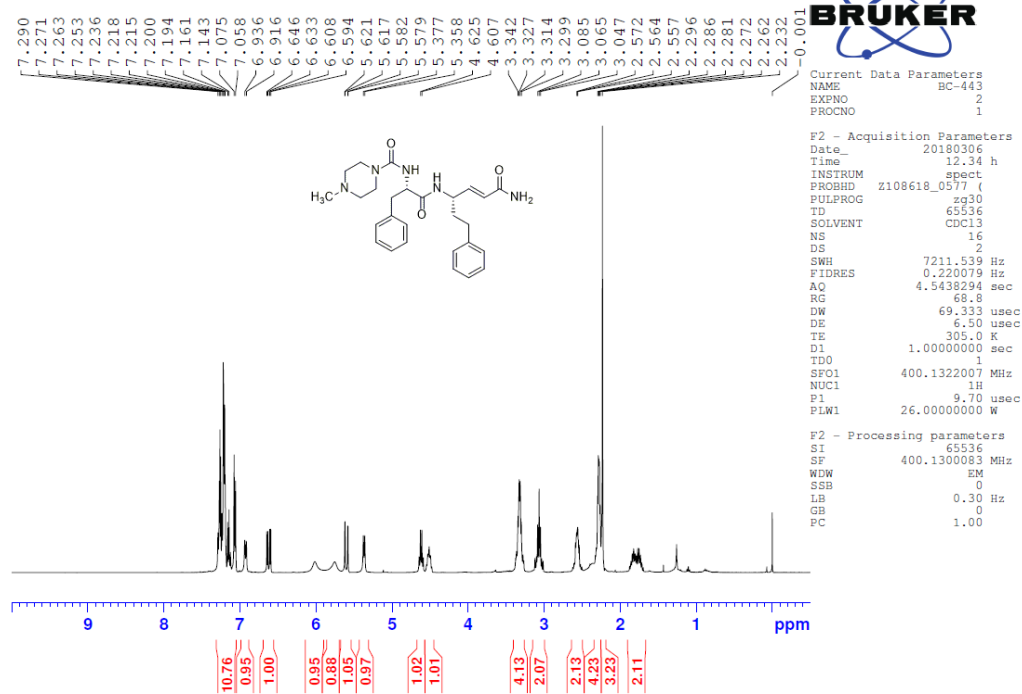

# <sup>13</sup>C NMR spectrum of compound 4

BC-443, purified <sup>13</sup>C NMR, CDCl<sub>3</sub>

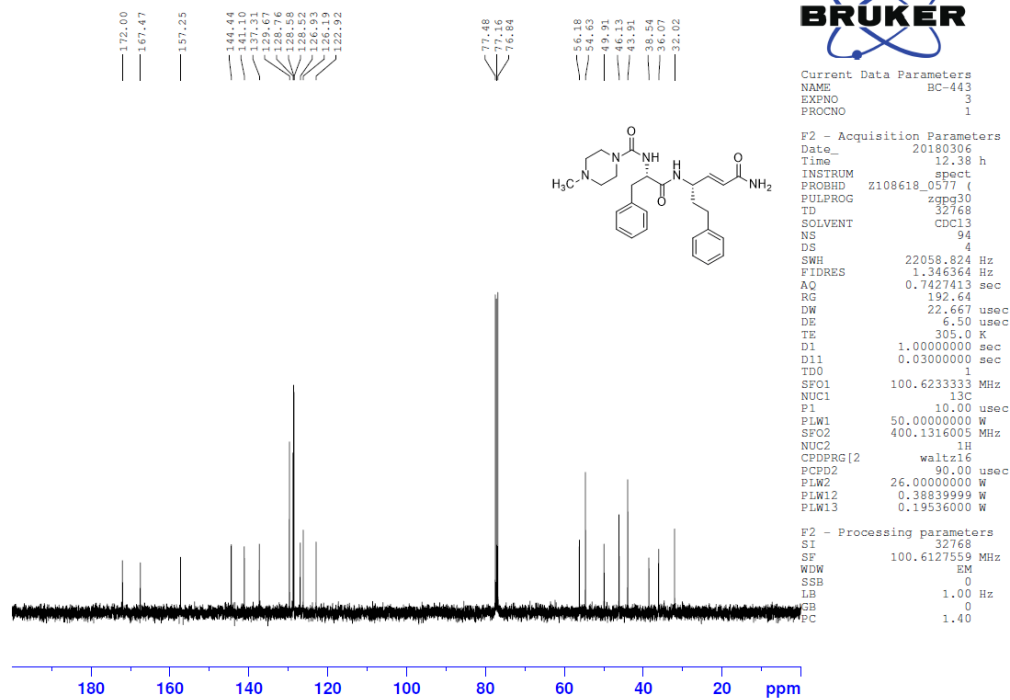

### <sup>1</sup>H NMR spectrum of compound **5**

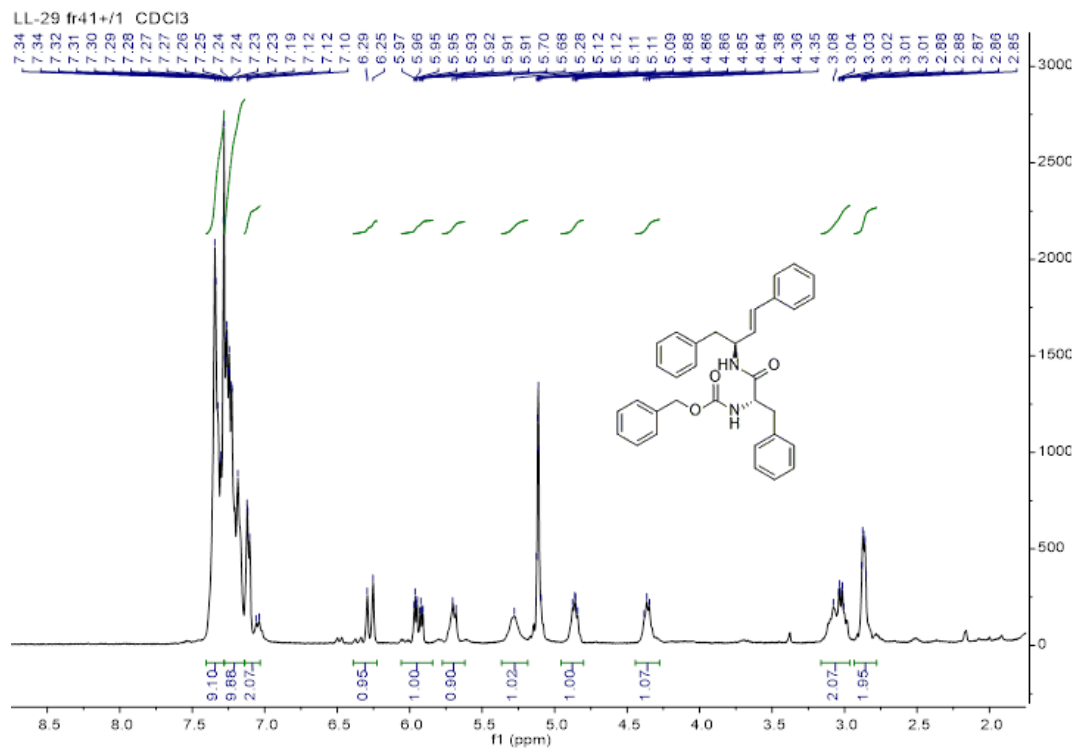

### <sup>13</sup>C NMR spectrum of compound **5**

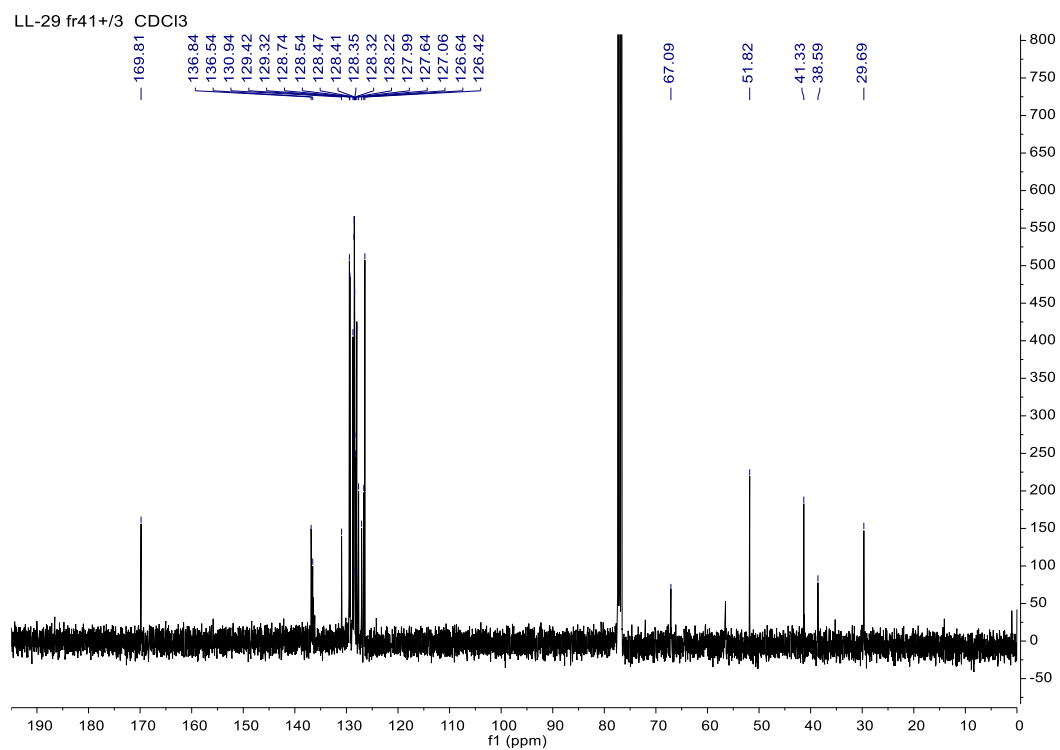

# <sup>1</sup>H NMR spectrum of compound 6

BC-250C, <sup>1</sup>H NMR, purified-twice, DMSO-d<sub>6</sub>

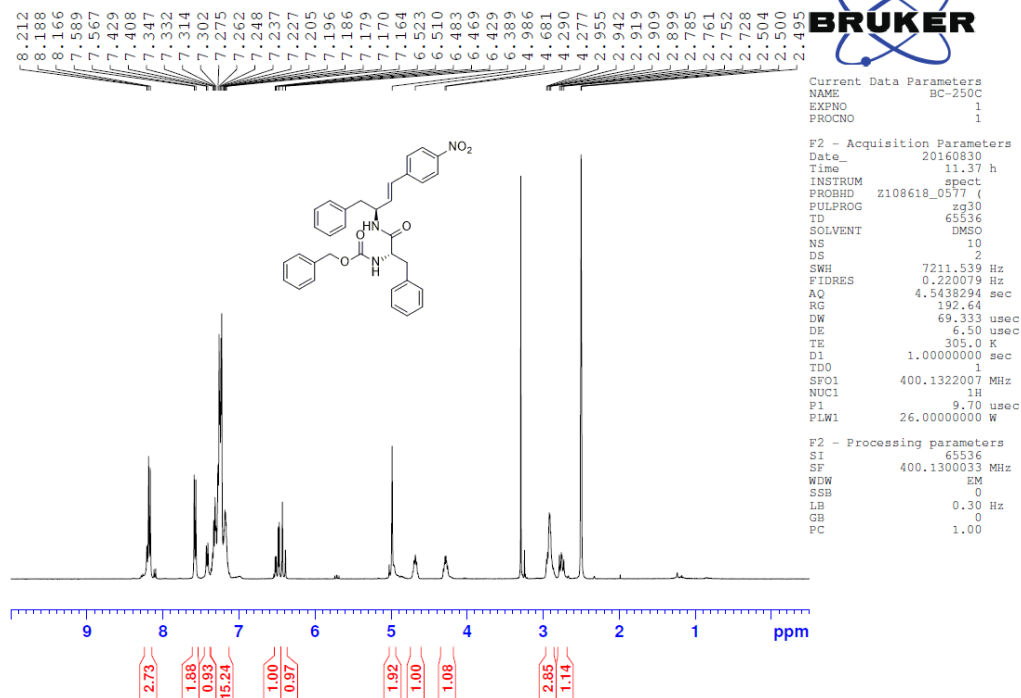

# <sup>13</sup>C NMR spectrum of compound 6

BC-250C, <sup>13</sup>C NMR, purified-twice, DMSO-d<sub>6</sub>

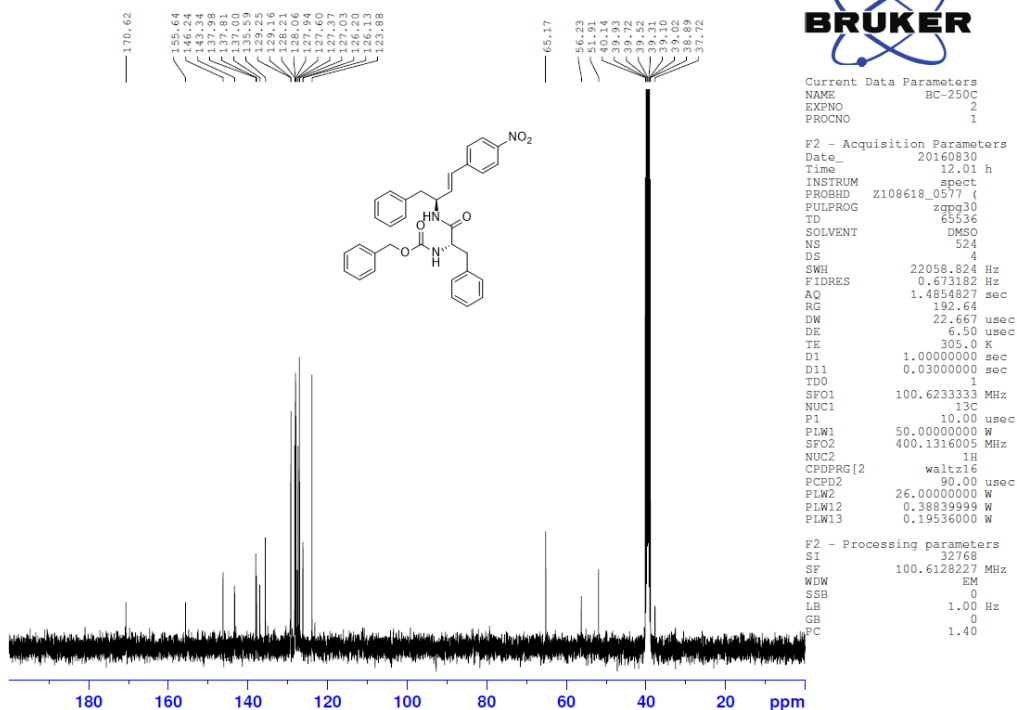

# <sup>1</sup>H NMR spectrum of compound 7

BC-239A <sup>1</sup>H NMR Purified-crystallized CDCl<sub>3</sub>

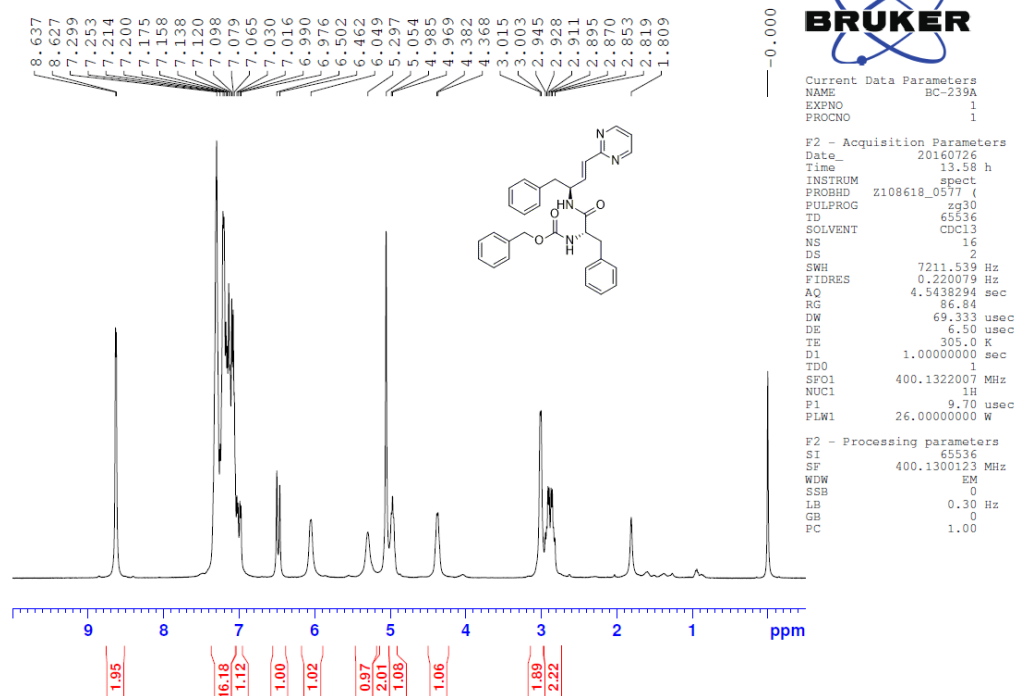

# <sup>13</sup>C NMR spectrum of compound 7

BC-239A <sup>13</sup>C NMR Purified-crystallized CDCl<sub>3</sub>

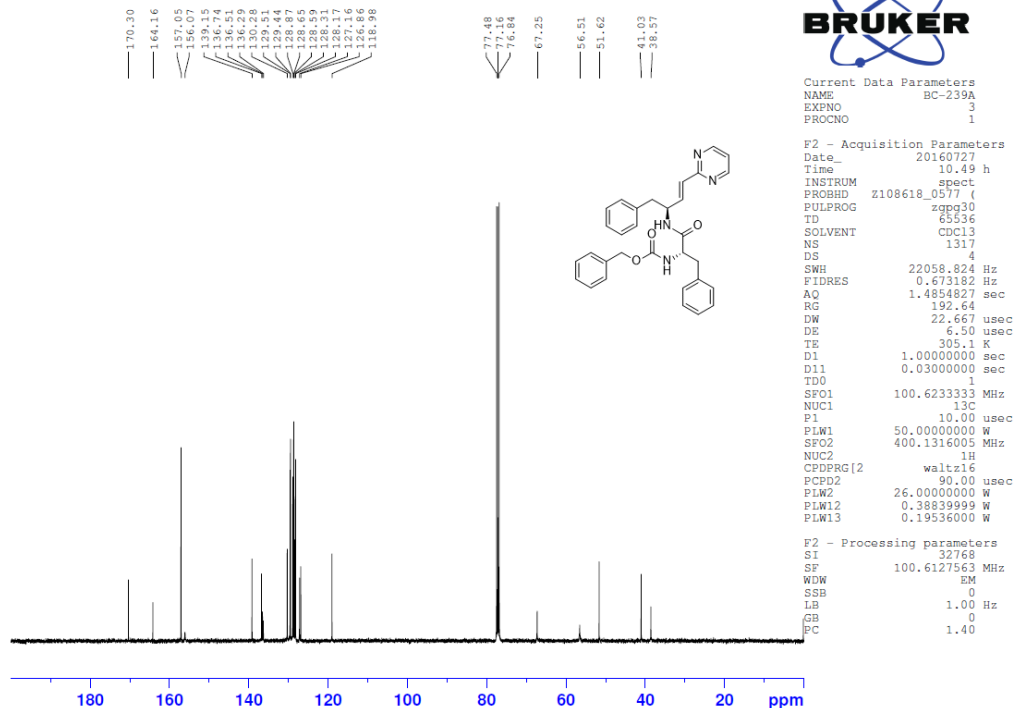

# <sup>1</sup>H NMR spectrum of compound 8

LL-307\_fr25/1 CDCl<sub>3</sub>

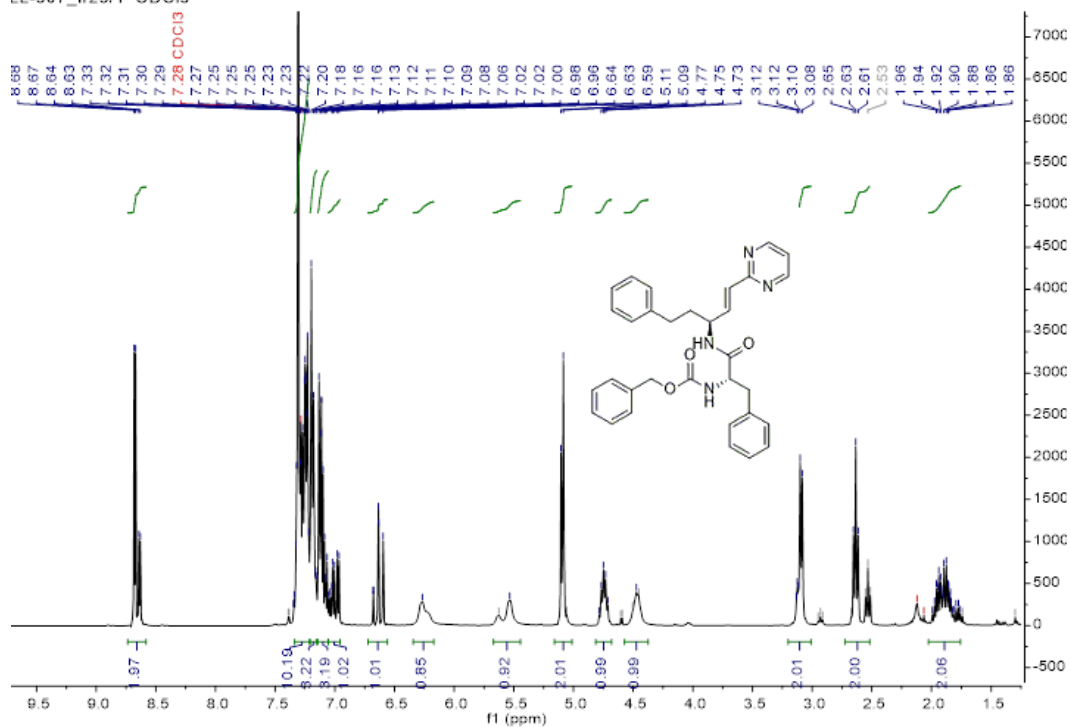

# <sup>13</sup>C NMR spectrum of compound 8

LL-307\_fr25/2 CDCl<sub>3</sub>

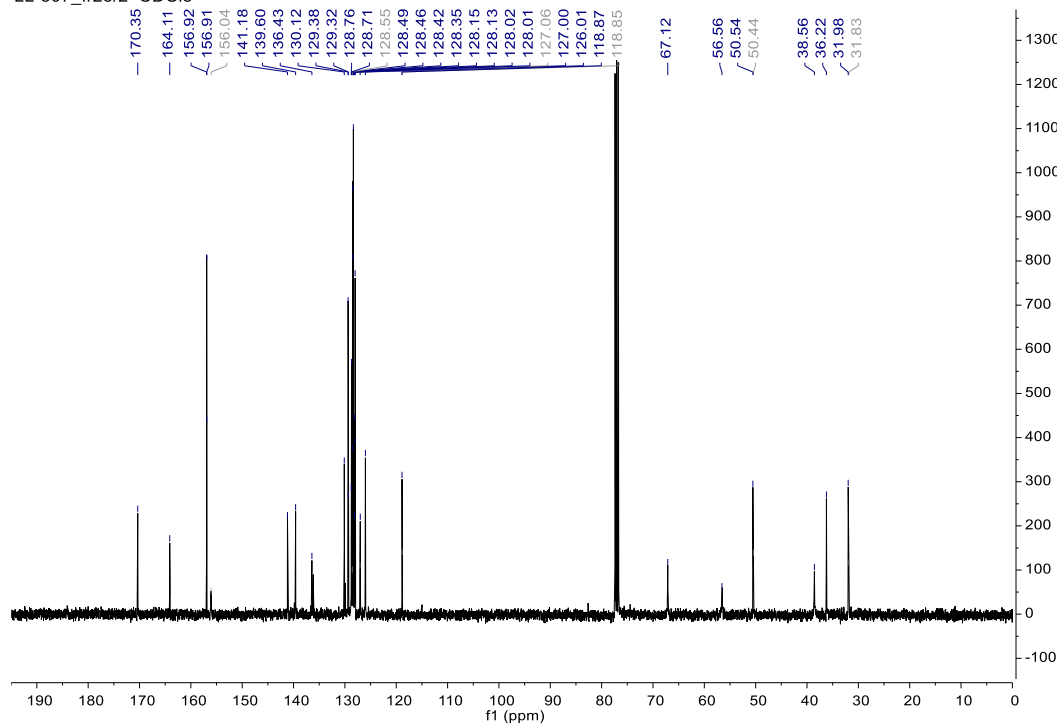

# <sup>1</sup>H NMR spectrum of compound 9

BC-415A, <sup>1</sup>H NMR, Purified, CDCl<sub>3</sub>

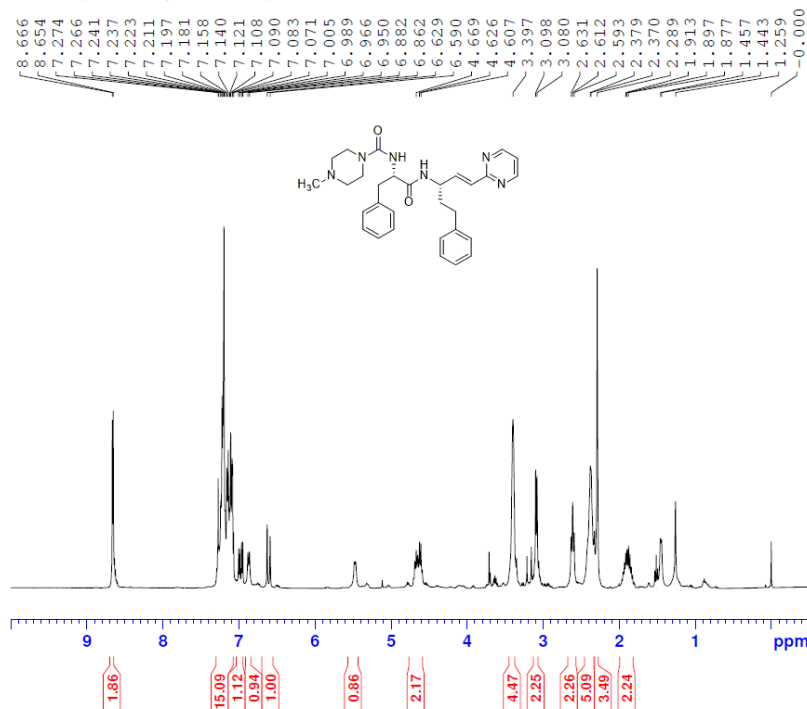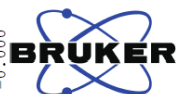

Current Data Parameters  
 NAME BC-415A  
 EXPNO 1  
 PROCNO 1

F2 - Acquisition Parameters  
 Date\_ 20171113  
 Time 10.41 h  
 INSTRUM spect  
 PROBHD Z108618\_0577 (  
 PULPROG zg30  
 TD 65536  
 SOLVENT CDCl3  
 NS 16  
 DS 2  
 SWH 4807.692 Hz  
 FIDRES 0.144719 Hz  
 AQ 6.8157439 sec  
 RG 55.4  
 DW 104.000 usec  
 DE 6.50 usec  
 TE 305.0 K  
 D1 1.00000000 sec  
 TDO 1  
 SFO1 400.1322007 MHz  
 NUC1 1H  
 P1 9.70 usec  
 PLW1 26.00000000 W

F2 - Processing parameters  
 SI 65536  
 SF 400.1300041 MHz  
 WDW EM  
 SSB 0  
 LB 0.30 Hz  
 GB 0  
 PC 1.00

# <sup>13</sup>C NMR spectrum of compound 9

BC-415A, <sup>13</sup>C NMR, Purified, CDCl<sub>3</sub>

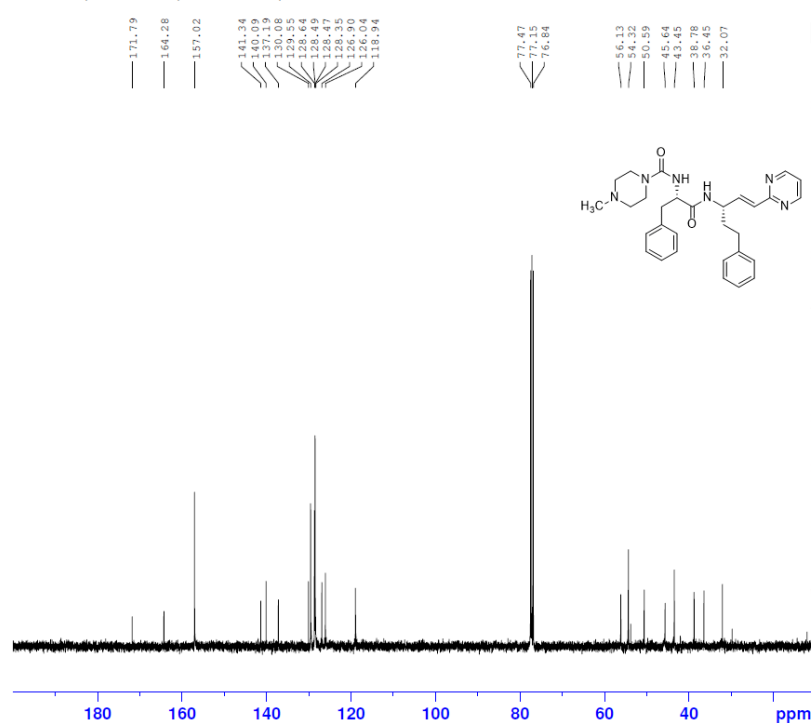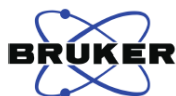

Current Data Parameters  
 NAME BC-415A  
 EXPNO 2  
 PROCNO 1

F2 - Acquisition Parameters  
 Date\_ 20171113  
 Time 10.48 h  
 INSTRUM spect  
 PROBHD Z108618\_0577 (  
 PULPROG zgpg30  
 TD 65536  
 SOLVENT CDCl3  
 NS 127  
 DS 4  
 SWH 22050.024 Hz  
 FIDRES 0.673182 Hz  
 AQ 1.4854827 sec  
 RG 192.64  
 DW 22.667 usec  
 DE 6.50 usec  
 TE 305.1 K  
 D1 1.00000000 sec  
 D11 0.03000000 sec  
 TDO 1  
 SFO1 100.6233333 MHz  
 NUC1 13C  
 P1 10.00 usec  
 PLW1 50.00000000 W  
 SFO2 400.1316005 MHz  
 NUC2 1H  
 CPDPRG[2] waltz16  
 PCPD2 90.00 usec  
 PLW2 26.00000000 W  
 PLW12 0.38839999 W  
 PLW13 0.19536000 W

F2 - Processing parameters  
 SI 32768  
 SF 100.6127600 MHz  
 WDW EM  
 SSB 0  
 LB 1.00 Hz  
 GB 0  
 PC 1.40

# <sup>1</sup>H NMR spectrum of compound 10

BC-308A, <sup>1</sup>H NMR, Purified, CDCl<sub>3</sub>+MeOD

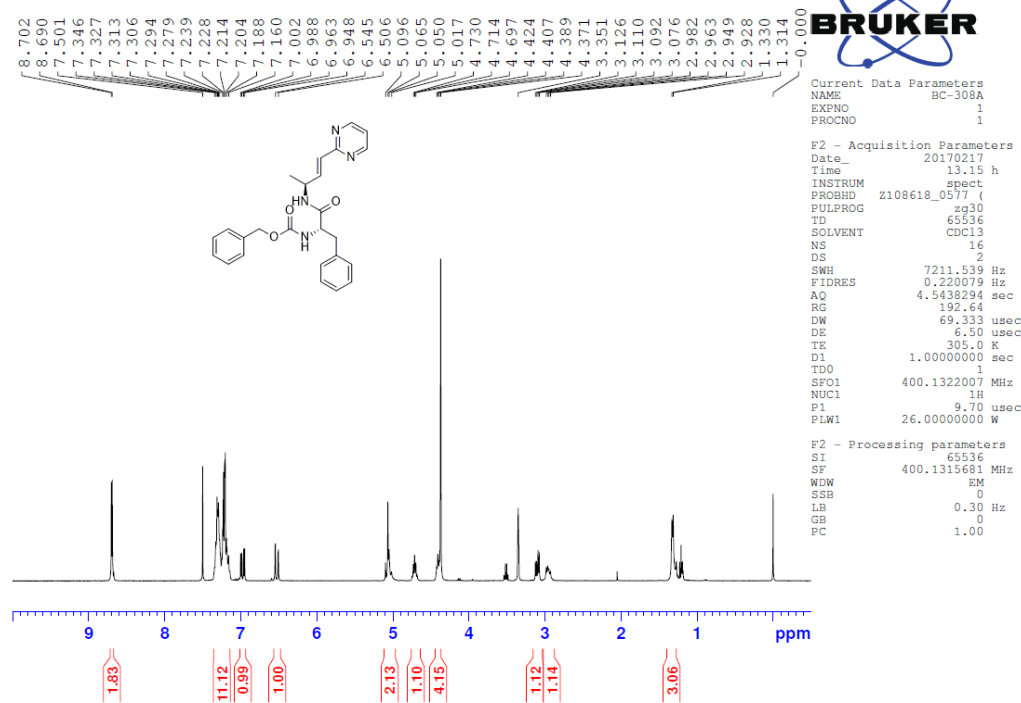

# <sup>13</sup>C NMR spectrum of compound 10

BC-308A, <sup>13</sup>C NMR, Purified, CDCl<sub>3</sub>+MeOD

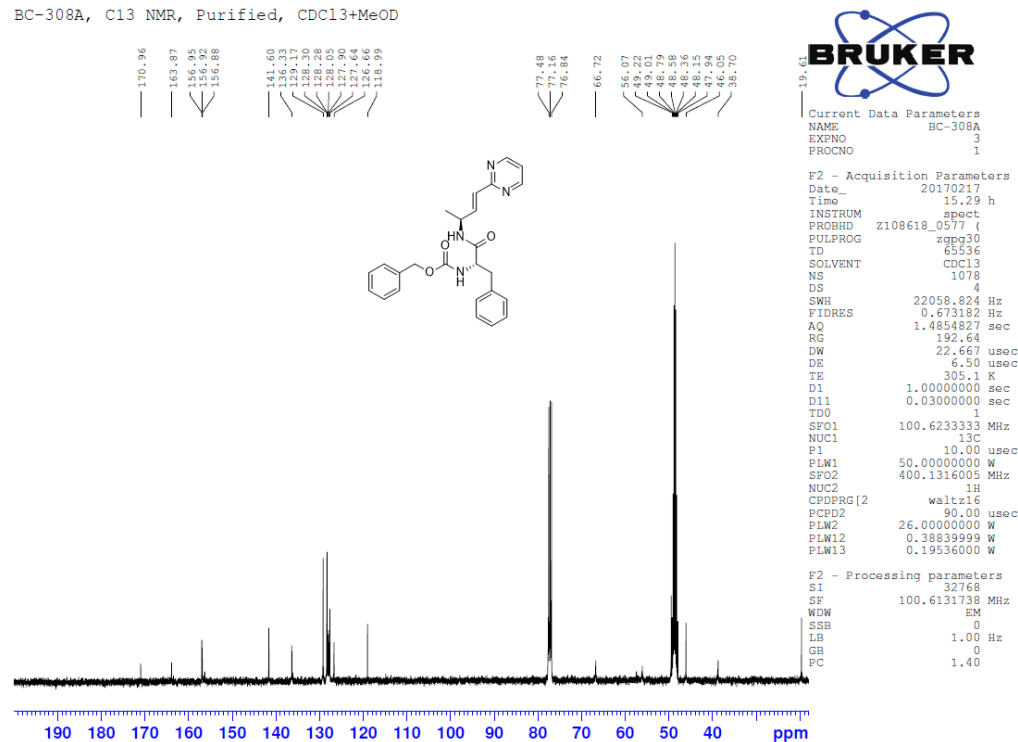

# <sup>1</sup>H NMR spectrum of compound 11

BC-260D (BC-278A), <sup>1</sup>H NMR, Purified, CDCl<sub>3</sub>

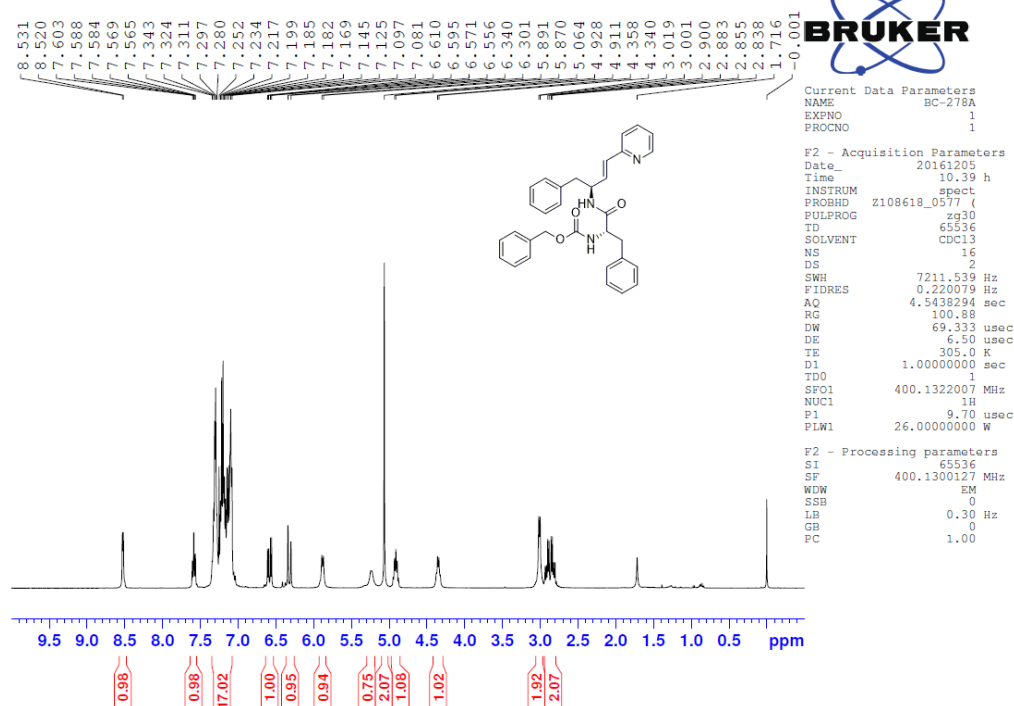

# <sup>13</sup>C NMR spectrum of compound 11

BC-260D, <sup>13</sup>C NMR, Pure, CDCl<sub>3</sub>

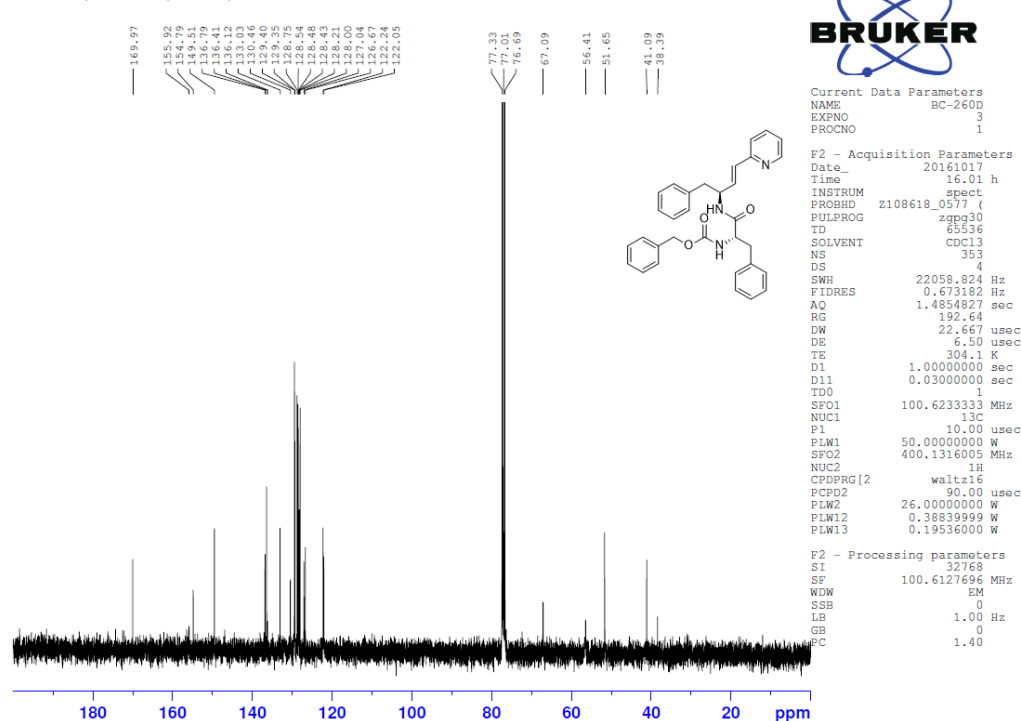





# <sup>1</sup>H NMR spectrum of compound 13

BC-380, <sup>1</sup>H NMR, CDCl<sub>3</sub>

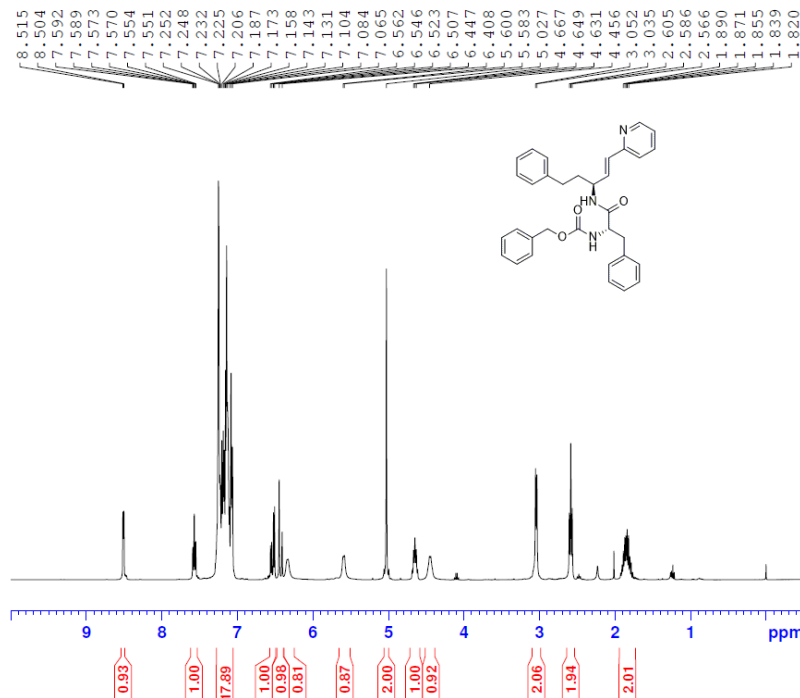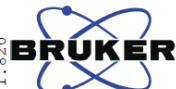

Current Data Parameters  
 NAME BC-380  
 EXPNO 1  
 PROCNO 1

F2 - Acquisition Parameters  
 Date\_ 20170710  
 Time 12.14 h  
 INSTRUM spect  
 PROBHD Z108618\_0577 ( )  
 PULPROG zgpg30  
 TD 65536  
 SOLVENT CDCl3  
 NS 16  
 DS 2  
 SWH 4807.692 Hz  
 FIDRES 0.146719 Hz  
 AQ 6.8157439 sec  
 RG 24.52  
 DW 104.000 usec  
 DE 6.50 usec  
 TE 305.0 K  
 D1 1.00000000 sec  
 TDO 1  
 SFO1 400.1322007 MHz  
 NUC1 1H  
 P1 9.70 usec  
 PLW1 26.00000000 W

F2 - Processing parameters  
 SI 65536  
 SF 400.1300207 MHz  
 WDW EM  
 SSB 0  
 LB 0.30 Hz  
 GB 0  
 PC 1.00

# <sup>13</sup>C NMR spectrum of compound 13

BC-380, <sup>13</sup>C NMR, CDCl<sub>3</sub>

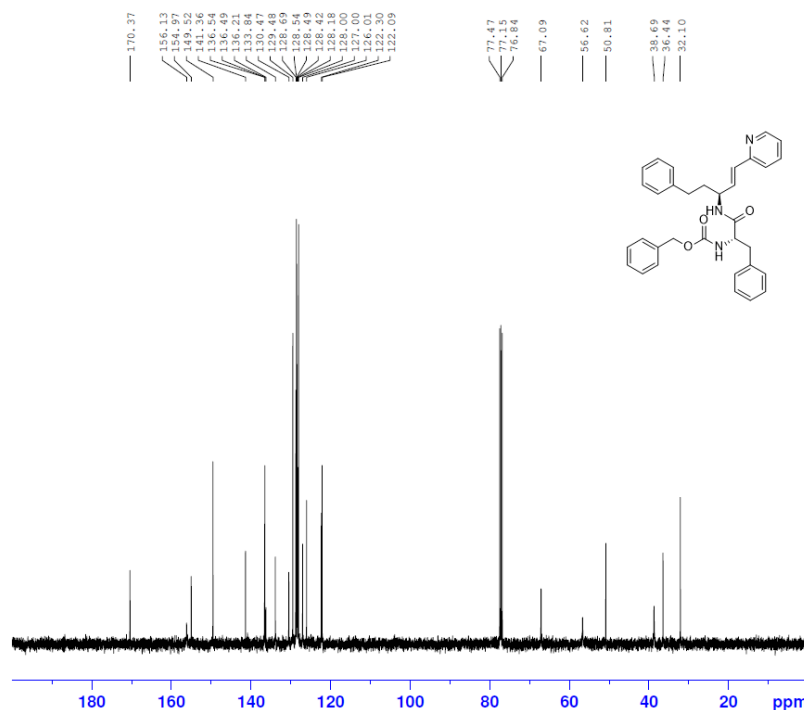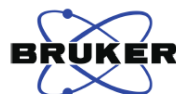

Current Data Parameters  
 NAME BC-380  
 EXPNO 2  
 PROCNO 1

F2 - Acquisition Parameters  
 Date\_ 20170710  
 Time 12.18 h  
 INSTRUM spect  
 PROBHD Z108618\_0577 ( )  
 PULPROG zgpg30  
 TD 65536  
 SOLVENT CDCl3  
 NS 41  
 DS 4  
 SWH 22058.824 Hz  
 FIDRES 0.673182 Hz  
 AQ 1.4854827 sec  
 RG 192.64  
 DW 22.667 usec  
 DE 6.50 usec  
 TE 305.0 K  
 D1 1.00000000 sec  
 D11 0.03000000 sec  
 TDO 1  
 SFO1 100.6233333 MHz  
 NUC1 13C  
 P1 10.00 usec  
 PLW1 50.00000000 W  
 SFO2 400.1316005 MHz  
 NUC2 1H  
 CPDPRG2 waltz16  
 ECPD2 90.00 usec  
 PLW2 26.00000000 W  
 PLW12 0.38839999 W  
 PLW13 0.19536000 W

F2 - Processing parameters  
 SI 32768  
 SF 100.6127666 MHz  
 WDW EM  
 SSB 0  
 LB 1.00 Hz  
 GB 0  
 PC 1.40

# <sup>1</sup>H NMR spectrum of compound 14

BC-412A, <sup>1</sup>H NMR, Purified, CDCl<sub>3</sub>

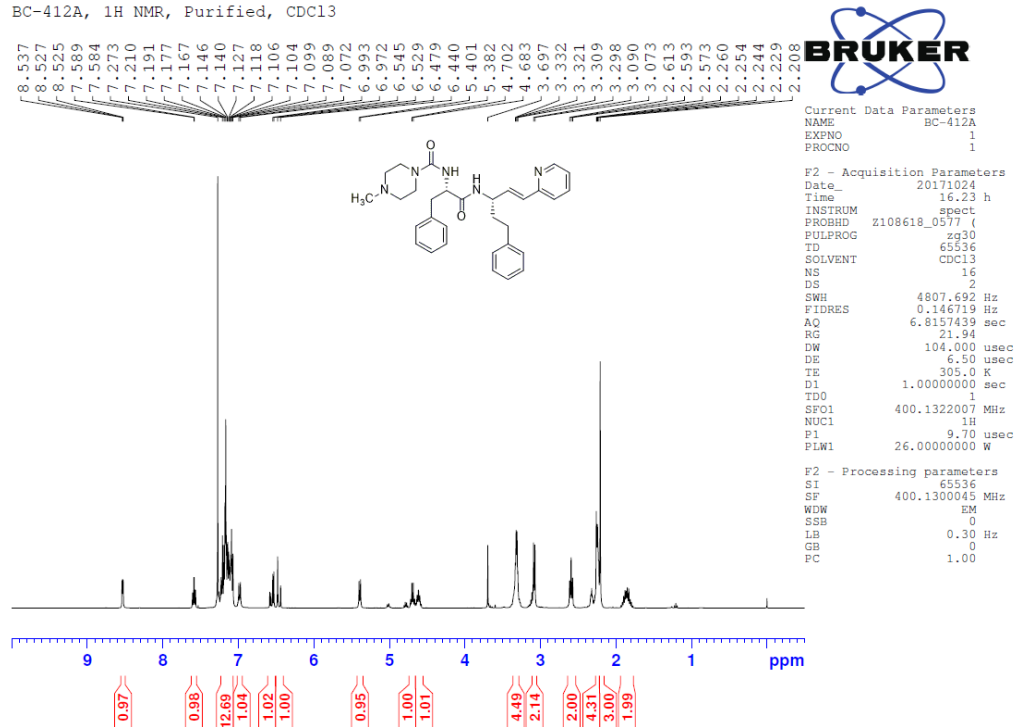

# <sup>13</sup>C NMR spectrum of compound 14

BC-412A, <sup>13</sup>C NMR, Purified, CDCl<sub>3</sub> #2

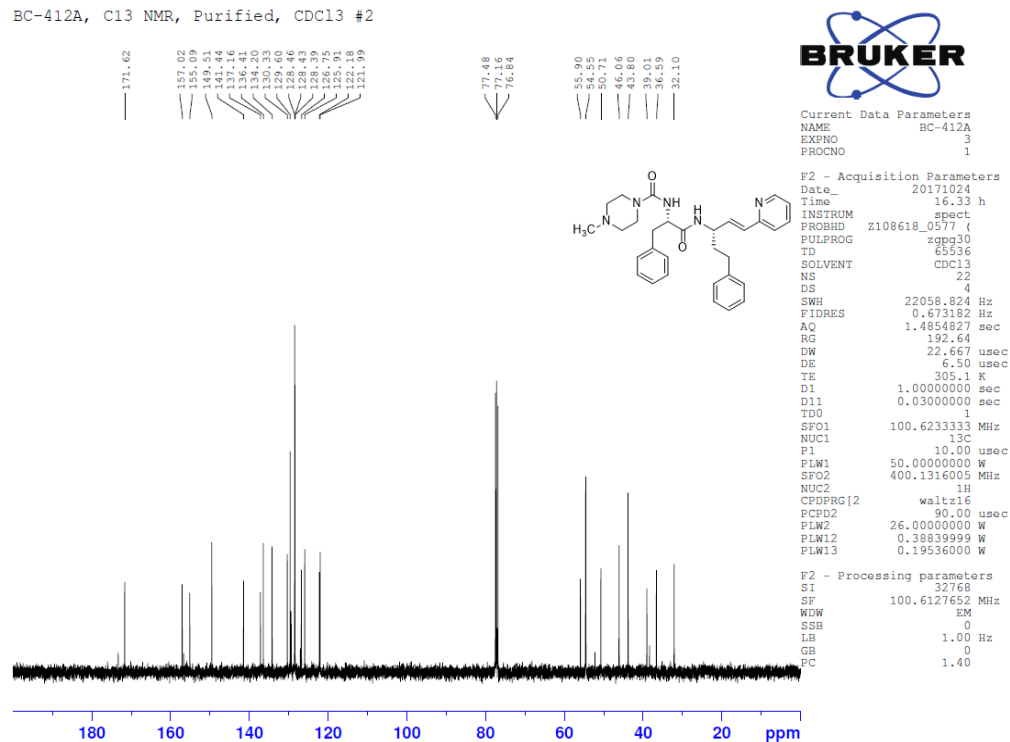

# <sup>1</sup>H NMR spectrum of compound 15

BC-397, <sup>1</sup>H NMR, CDCl<sub>3</sub>

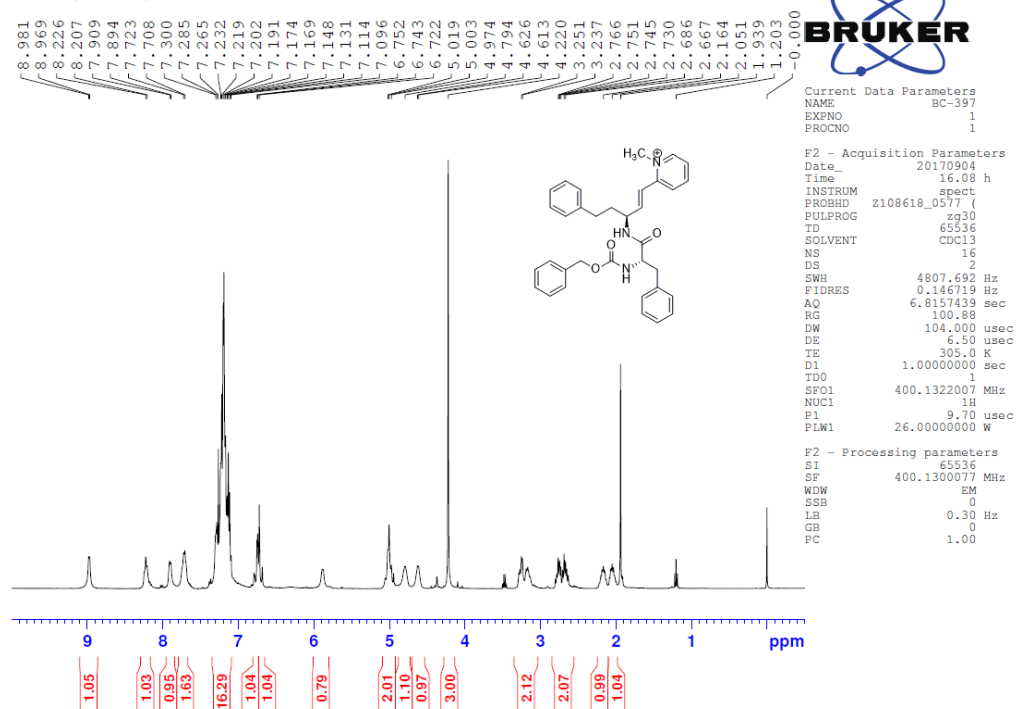

<sup>1</sup>H NMR spectrum of compound **16**

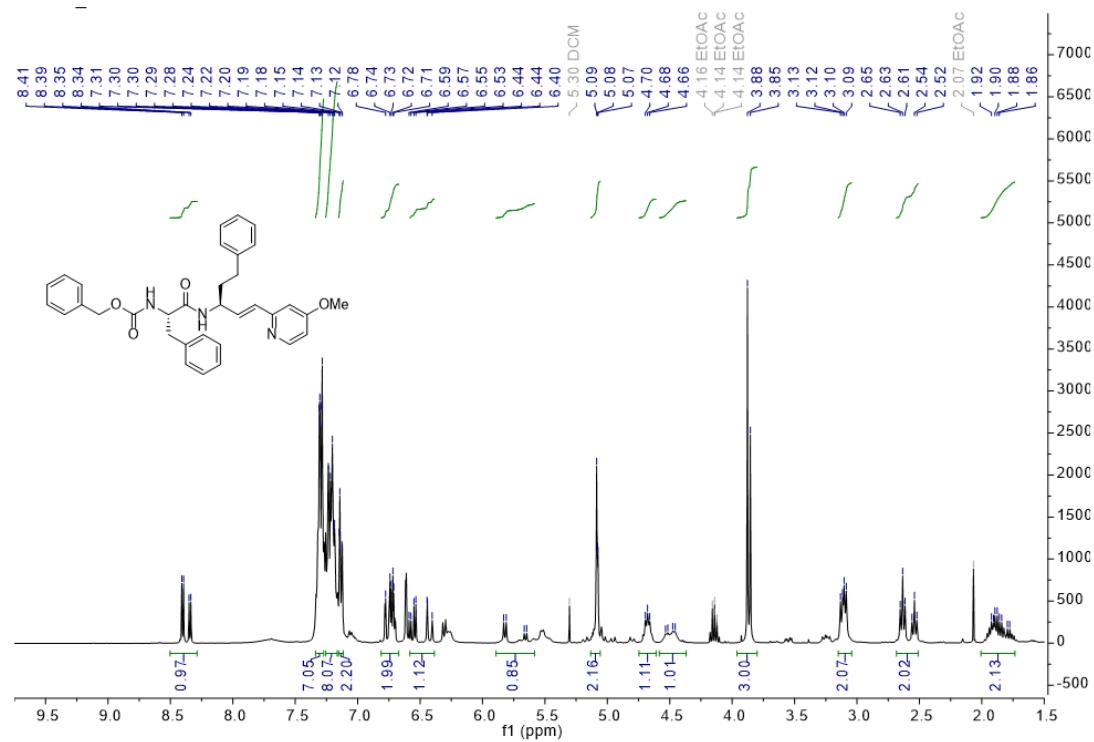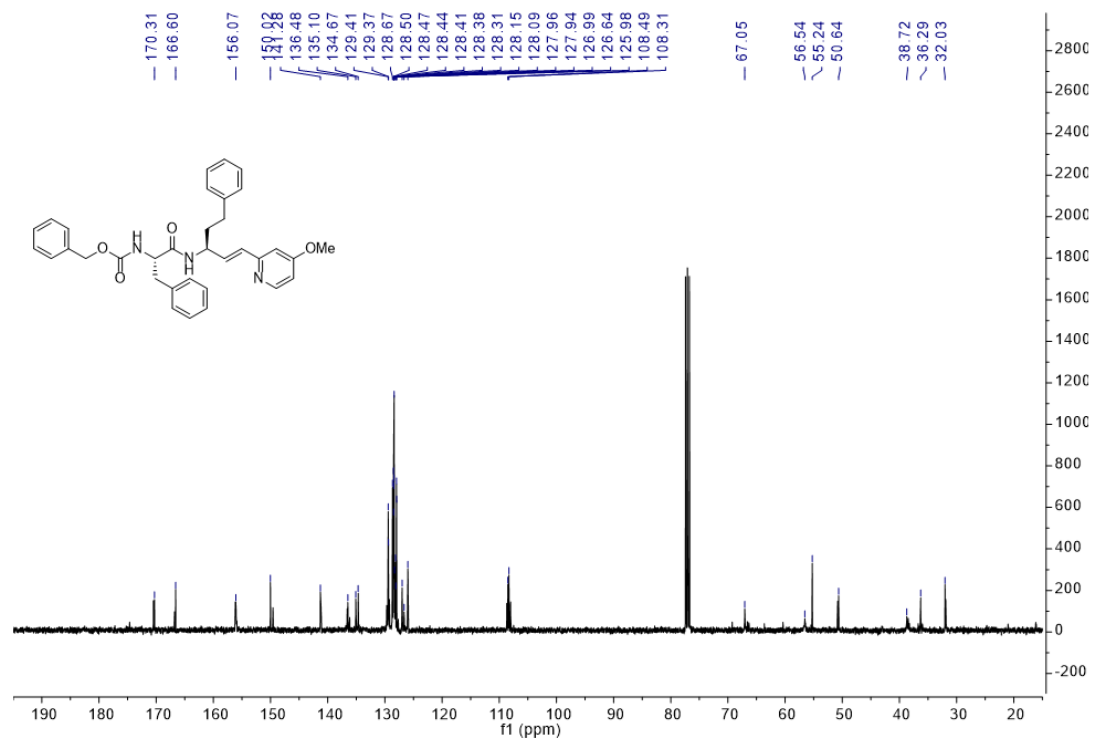

# <sup>1</sup>H NMR spectrum of compound 17

BC-582A, <sup>1</sup>H NMR, Purified, CDCl<sub>3</sub>  
PROTON\_TAMU CDCl<sub>3</sub> /data bala 48

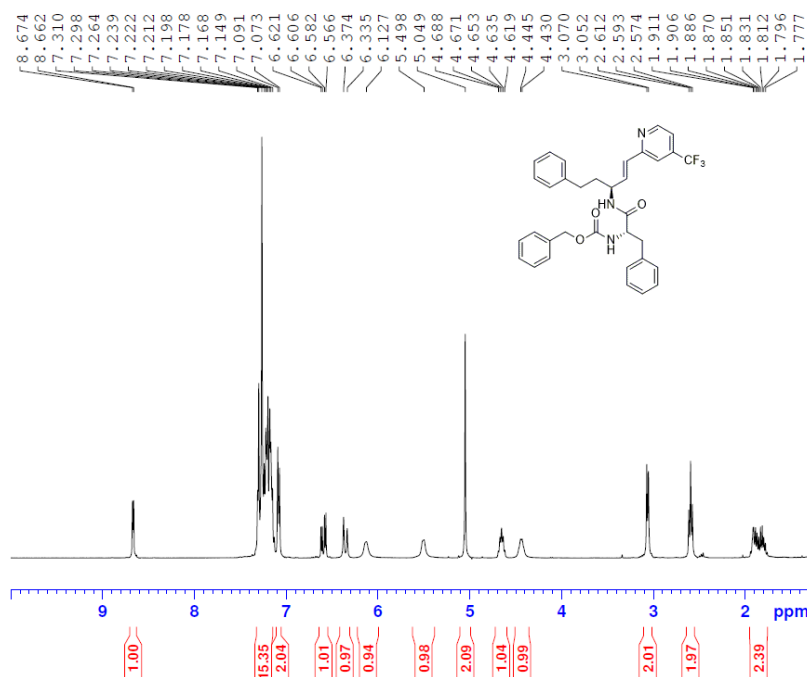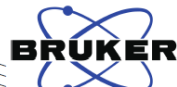

Current Data Parameters  
NAME BC-582A  
EXPNO 2  
PROCNO 1

F2 - Acquisition Parameters  
Date\_ 20190924  
Time 15.38 h  
INSTRUM spect  
PROBHD Z108618\_0577 ( )  
PULPROG zg30  
TD 65536  
SOLVENT CDCl<sub>3</sub>  
NS 2  
DS 2  
SWH 8012.820 Hz  
FIDRES 0.244532 Hz  
AQ 4.0894465 sec  
RG 31.82  
DW 62.400 usec  
DE 6.50 usec  
TE 305.0 K  
D1 1.00000000 sec  
TD0 1  
SF01 400.1324708 MHz  
NUC1 1H  
P0 3.23 usec  
P1 9.70 usec  
PLW1 26.00000000 W

F2 - Processing parameters  
SI 65536  
SF 400.1300177 MHz  
WDW EM  
SSB 0  
LB 0.30 Hz  
GB 0  
PC 1.00

# <sup>13</sup>C NMR spectrum of compound 17

BC-582A, <sup>13</sup>C NMR, Purified, CDCl<sub>3</sub>  
CARBON\_TAMU CDCl<sub>3</sub> /data bala 48

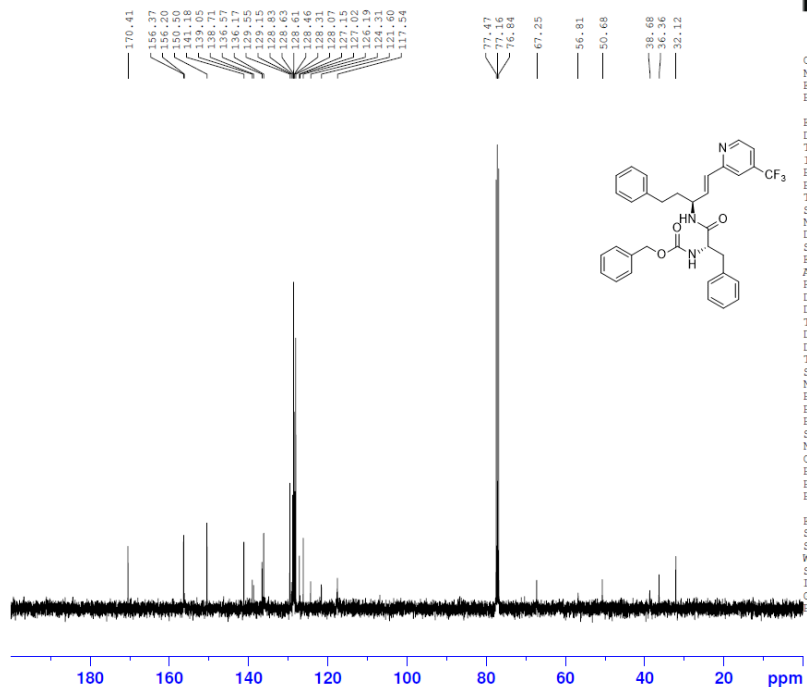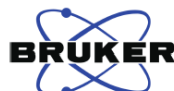

Current Data Parameters  
NAME BC-582A  
EXPNO 3  
PROCNO 1

F2 - Acquisition Parameters  
Date\_ 20190924  
Time 15.43 h  
INSTRUM spect  
PROBHD Z108618\_0577 ( )  
PULPROG zg1g30  
TD 65536  
SOLVENT CDCl<sub>3</sub>  
NS 54  
DS 4  
SWH 24038.461 Hz  
FIDRES 0.733596 Hz  
AQ 1.3631488 sec  
RG 192.64  
DW 20.800 usec  
DE 6.50 usec  
TE 305.0 K  
D1 3.00000000 sec  
D11 0.03000000 sec  
TD0 1  
SF01 100.6228298 MHz  
NUC1 13C  
P0 3.33 usec  
P1 10.00 usec  
PLW1 50.00000000 W  
SF02 400.1316005 MHz  
NUC2 1H  
CPDPRG2 waltz65  
PCPD2 90.00 usec  
PLW2 26.00000000 W  
PLW12 0.38839999 W

F2 - Processing parameters  
SI 32768  
SF 100.6127593 MHz  
WDW EM  
SSB 0  
LB 1.00 Hz  
GB 0  
PC 1.40

# <sup>1</sup>H NMR spectrum of compound 18

BC-384\_II, purified, <sup>1</sup>H NMR, CDCl<sub>3</sub>

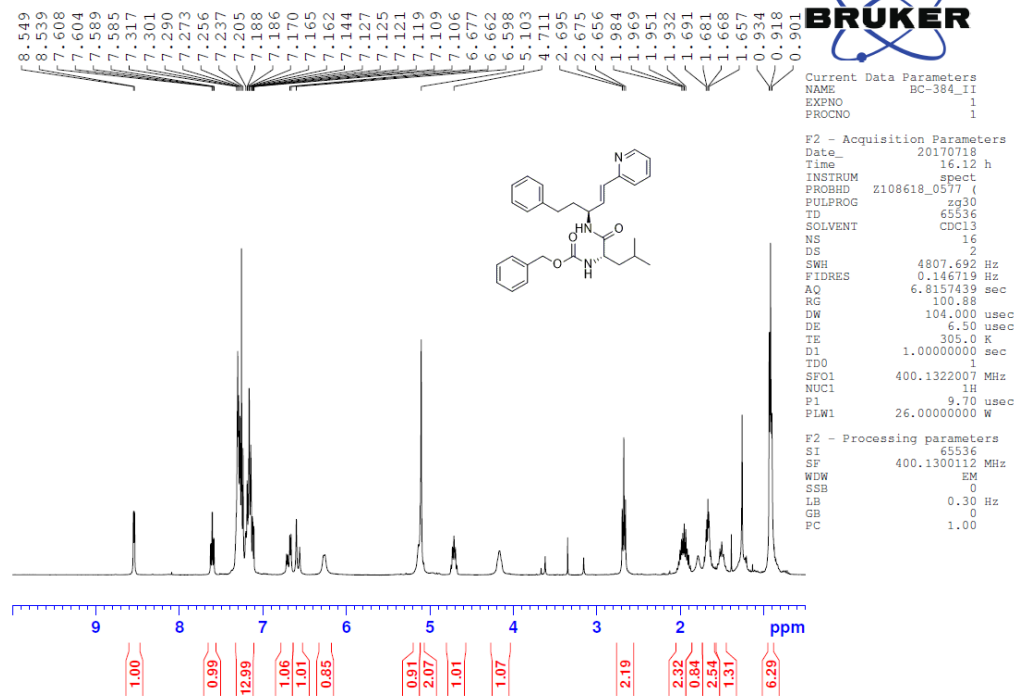

# <sup>13</sup>C NMR spectrum of compound 18

BC-384A, #3, purified, <sup>13</sup>C NMR, CDCl<sub>3</sub>

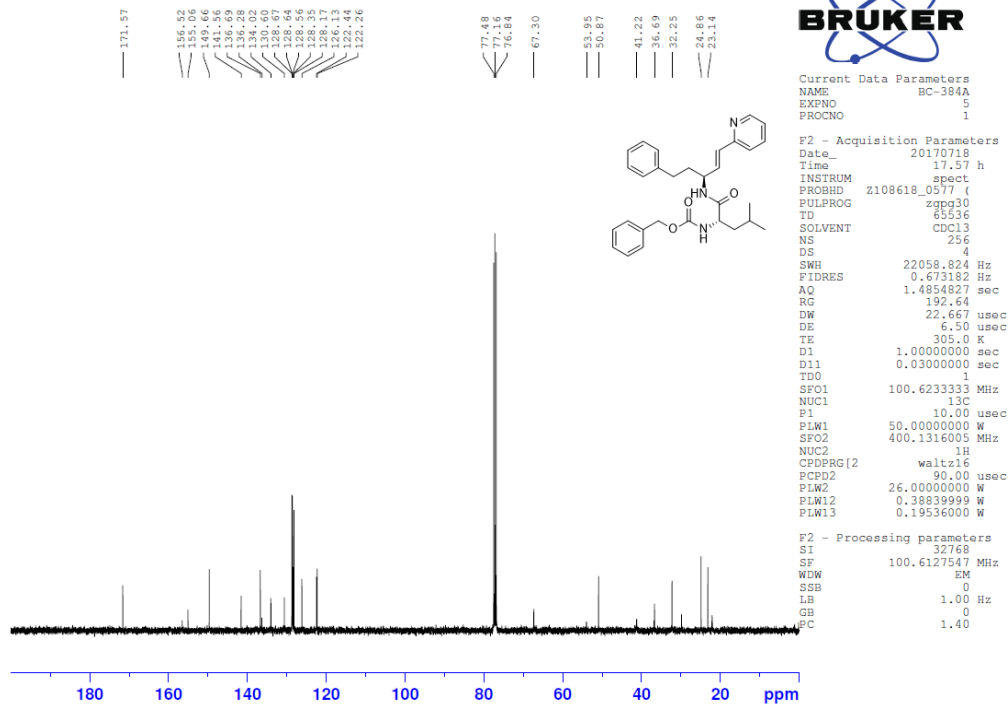

# <sup>1</sup>H NMR spectrum of compound **19**

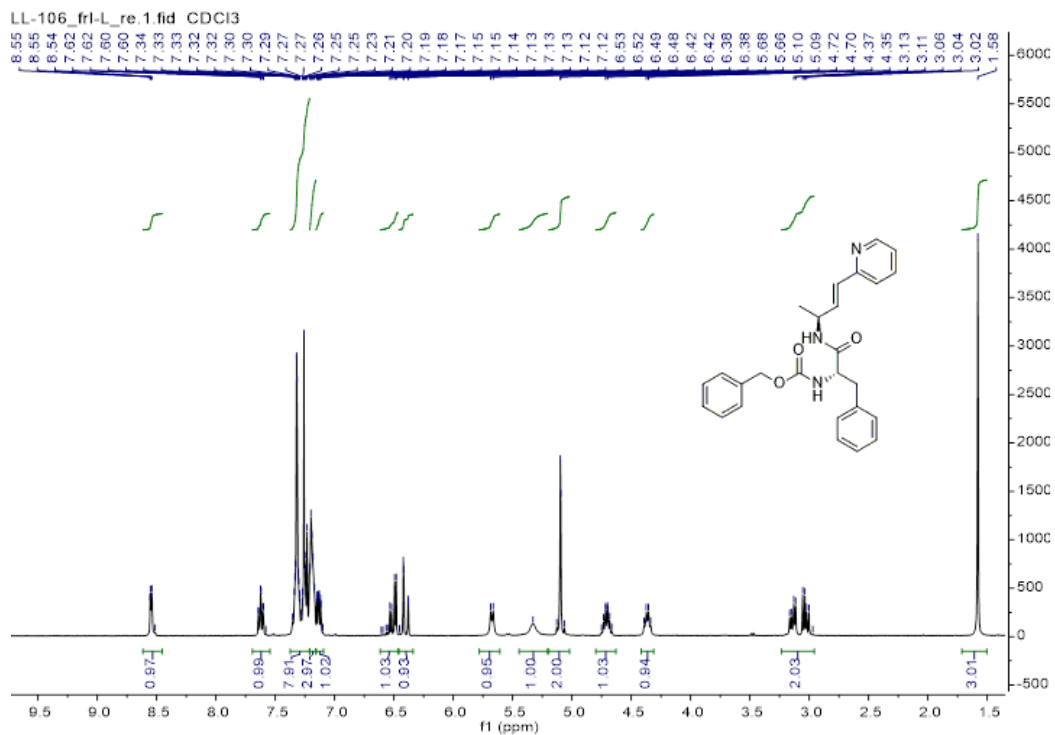

# <sup>13</sup>C NMR spectrum of compound **19**

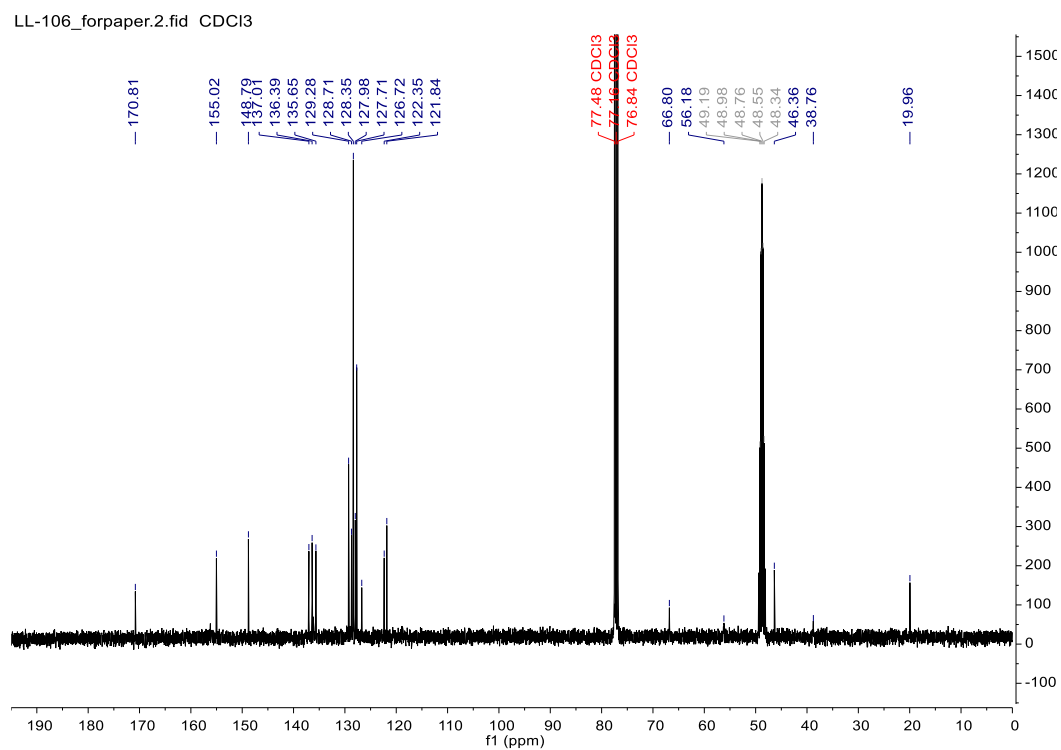



# <sup>1</sup>H NMR spectrum of compound 20

BC-566, HPLC purified, MeOD, <sup>1</sup>H NMR  
 PROTON\_TAMU MeOD /data bala 4

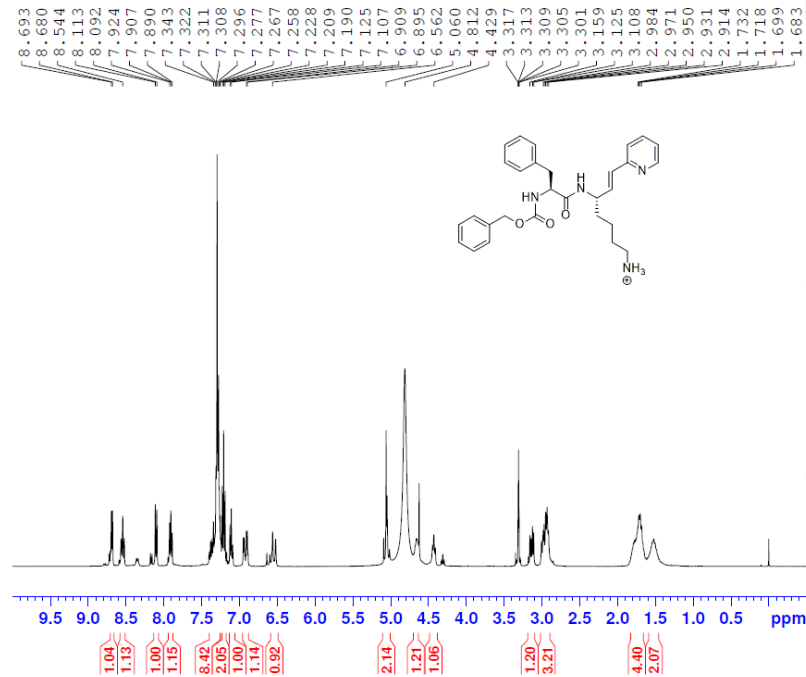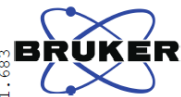

Current Data Parameters  
 NAME BC-566  
 EXPO 1  
 PROCNO 1

F2 - Acquisition Parameters  
 Date\_ 20190805  
 Time\_ 12.35 h  
 INSTRUM spect  
 PROBHD Z108618\_0577 ( )  
 PULPROG zg30  
 TD 65536  
 SOLVENT MeOD  
 NS 16  
 DS 2  
 SWH 8012.820 Hz  
 FIDRES 0.244532 Hz  
 AQ 4.0894465 sec  
 RG 55.4  
 DW 62.400 usec  
 DE 6.50 usec  
 TE 305.0 K  
 D1 1.00000000 sec  
 TDO 1  
 SFO1 400.1324708 MHz  
 NUC1 1H  
 P0 3.23 usec  
 P1 9.70 usec  
 PLW1 26.00000000 W

F2 - Processing parameters  
 SI 65536  
 SF 400.1300079 MHz  
 WDW EM  
 SSB 0  
 LB 0.30 Hz  
 GB 0  
 PC 1.00

# <sup>13</sup>C NMR spectrum of compound 20

BC-566, HPLC purified, MeOD, <sup>13</sup>C NMR  
 CARBON\_TAMU MeOD /data bala 4

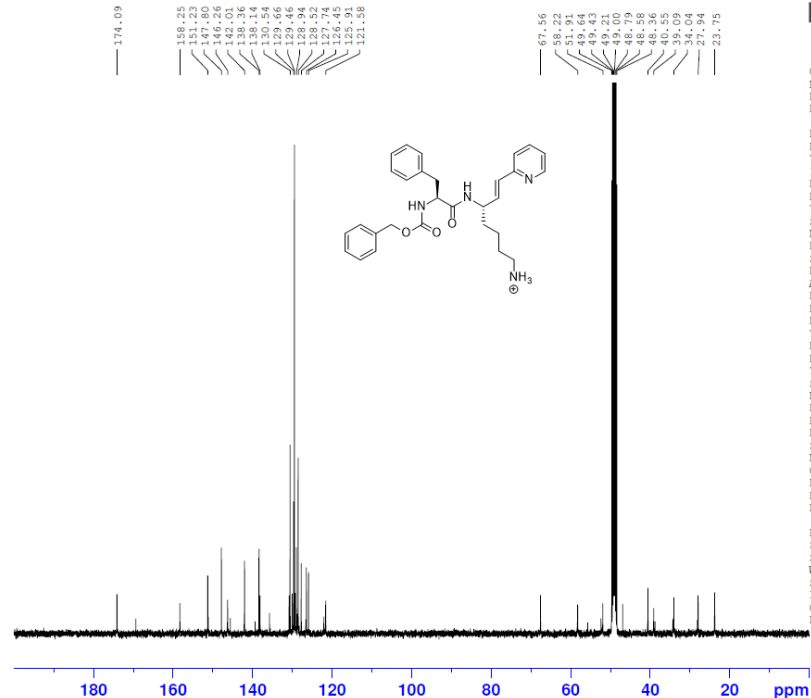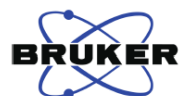

Current Data Parameters  
 NAME BC-566  
 EXPO 3  
 PROCNO 1

F2 - Acquisition Parameters  
 Date\_ 20190806  
 Time\_ 0.04 h  
 INSTRUM spect  
 PROBHD Z108618\_0577 ( )  
 PULPROG zgpg30  
 TD 65536  
 SOLVENT MeOD  
 NS 2444  
 DS 4  
 SWH 24038.461 Hz  
 FIDRES 0.733596 Hz  
 AQ 1.3631488 sec  
 RG 192.64  
 DW 20.800 usec  
 DE 6.50 usec  
 TE 305.0 K  
 D1 3.00000000 sec  
 D11 0.03000000 sec  
 TDO 1  
 SFO1 100.6228298 MHz  
 NUC1 13C  
 P0 3.33 usec  
 P1 10.00 usec  
 PLW1 50.00000000 W  
 SFO2 400.1316005 MHz  
 NUC2 1H  
 CPDPRG2 waltz165  
 PCPD2 90.00 usec  
 PLN2 26.00000000 W  
 PLW12 0.38839999 W

F2 - Processing parameters  
 SI 32768  
 SF 100.6126322 MHz  
 WDW EM  
 SSB 0  
 LB 1.00 Hz  
 GB 0  
 PC 1.40

# <sup>1</sup>H NMR spectrum of compound 21

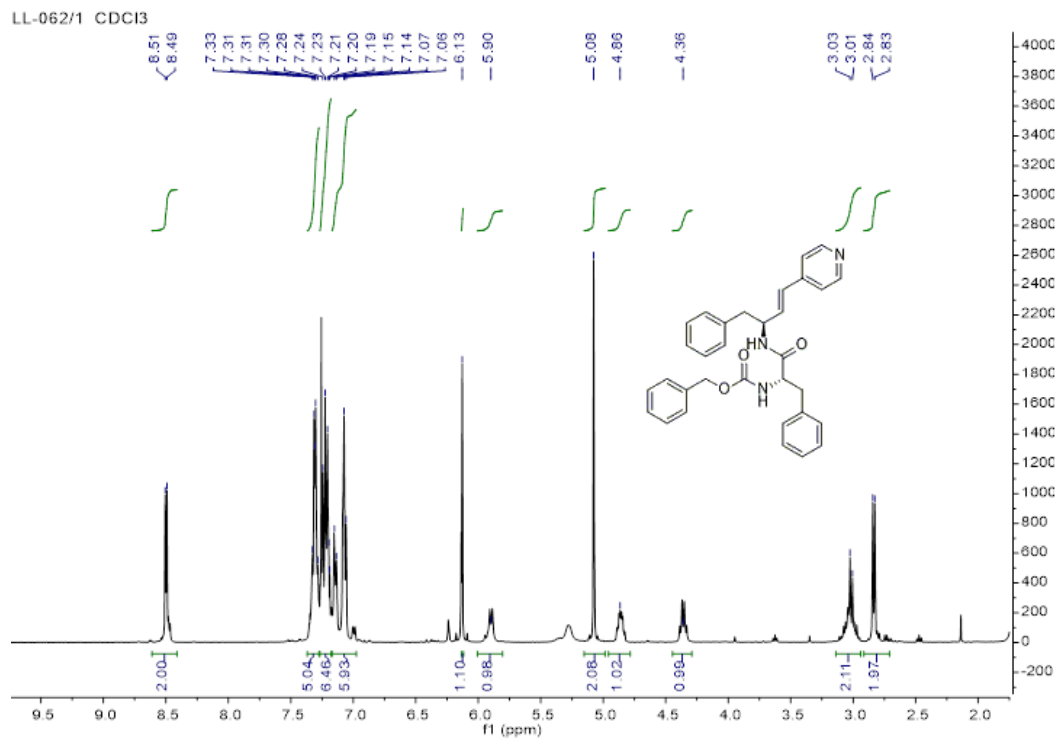

# <sup>13</sup>C NMR spectrum of compound 21

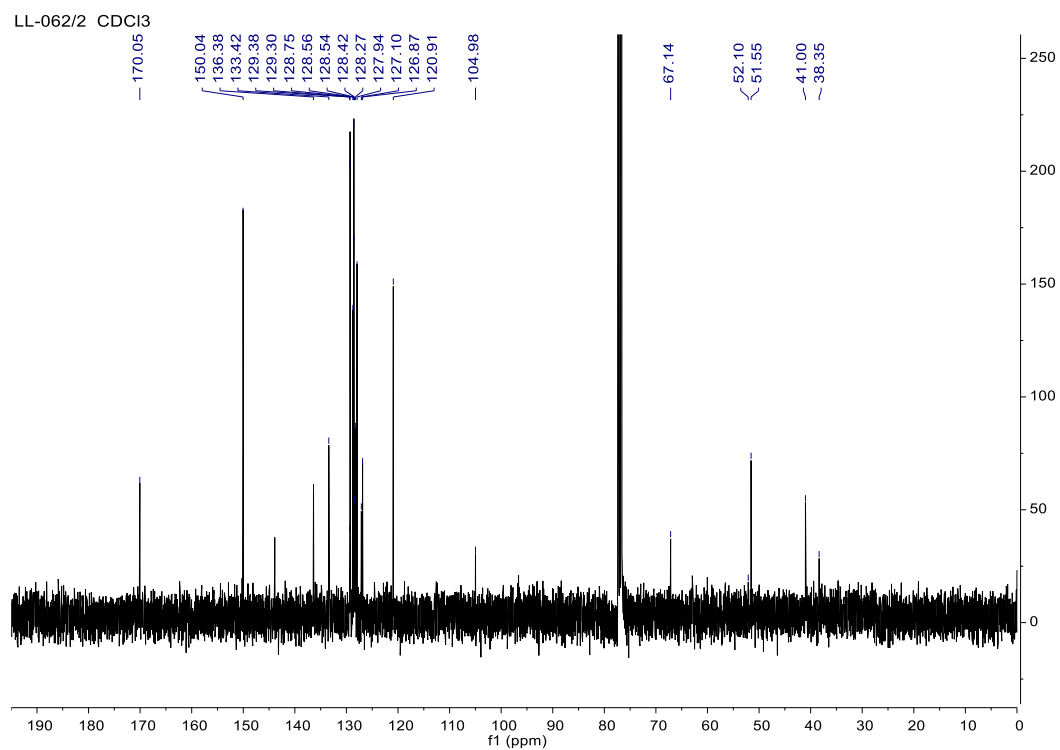



# <sup>1</sup>H NMR spectrum of compound 23

BC-337B, <sup>1</sup>H NMR, Purified, CDCl<sub>3</sub>

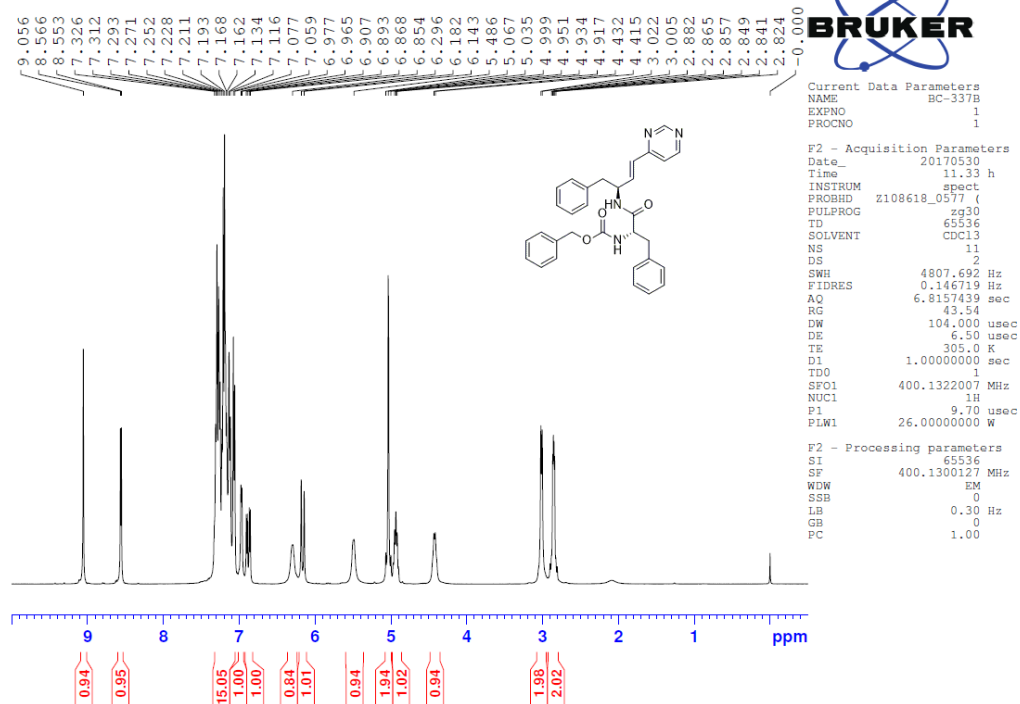

# <sup>13</sup>C NMR spectrum of compound 23

BC-337B, <sup>13</sup>C NMR, Purified, CDCl<sub>3</sub>

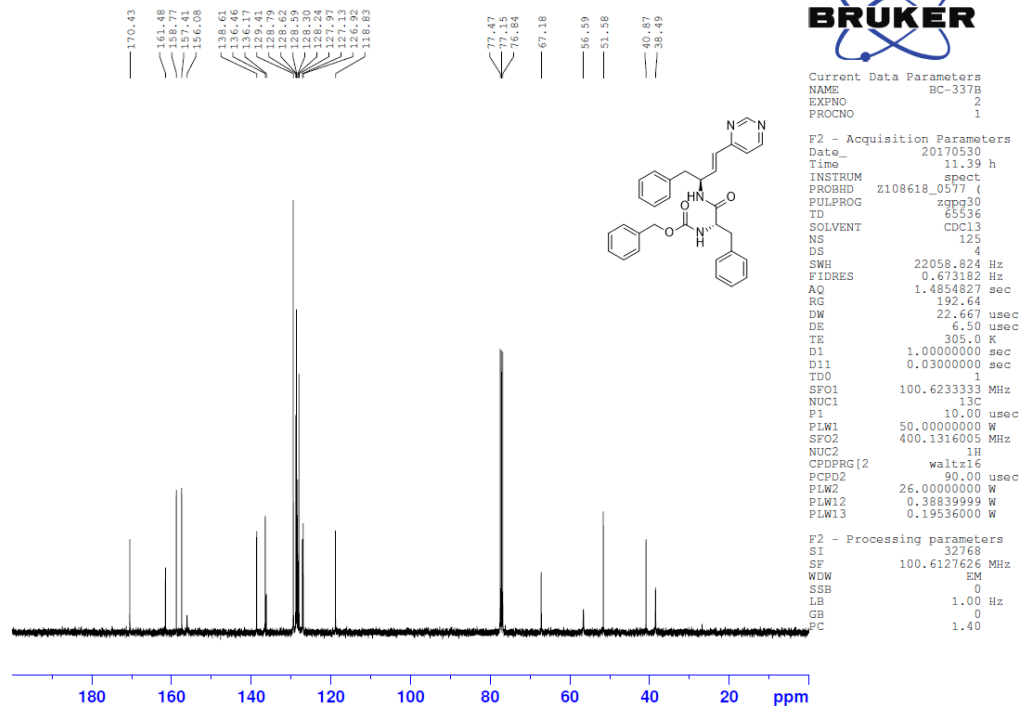

# <sup>1</sup>H NMR spectrum of compound 24

BC-218A Purified-crystallized 1HNMR, CDCl3

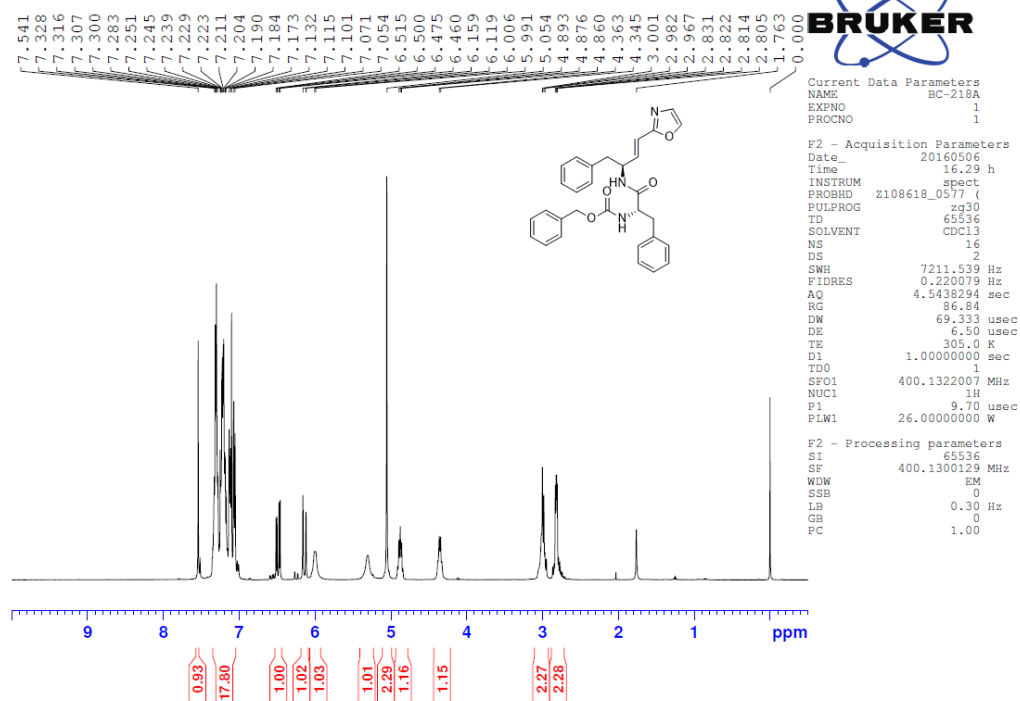

# <sup>13</sup>C NMR spectrum of compound 24

BC-218A, C13 NMR, CDCl3  
 CARBON\_TAMU CDCl3 /data bala 14

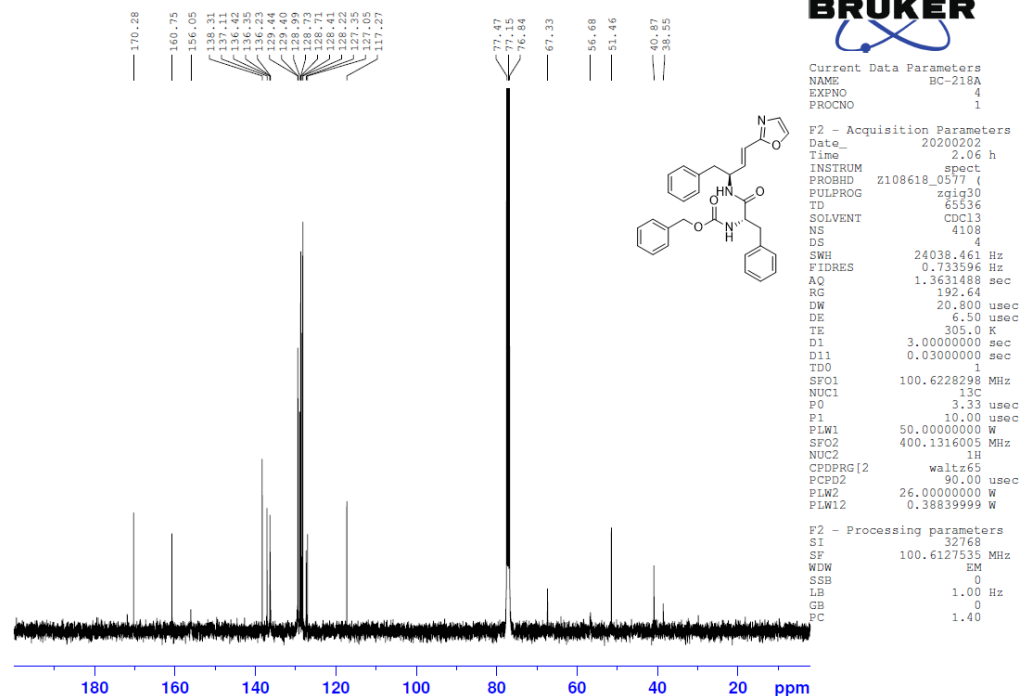

# <sup>1</sup>H NMR spectrum of compound 25

BC-174C, <sup>1</sup>H NMR, HPLC Purified, CDCl<sub>3</sub>

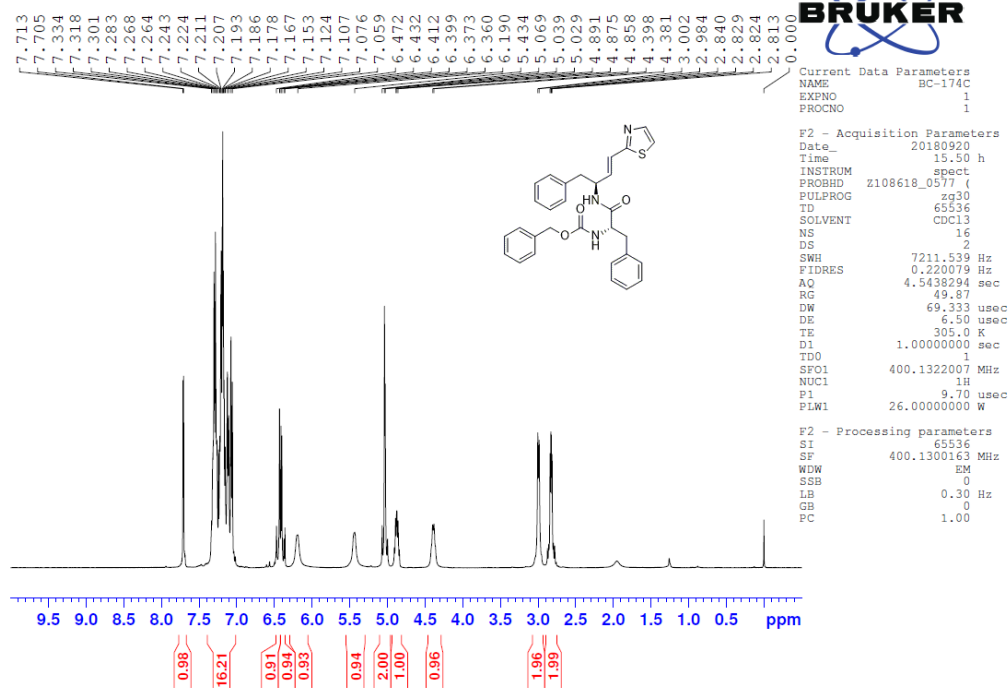

# <sup>13</sup>C NMR spectrum of compound 25

BC-174C, <sup>13</sup>C NMR, HPLC Purified, CDCl<sub>3</sub>

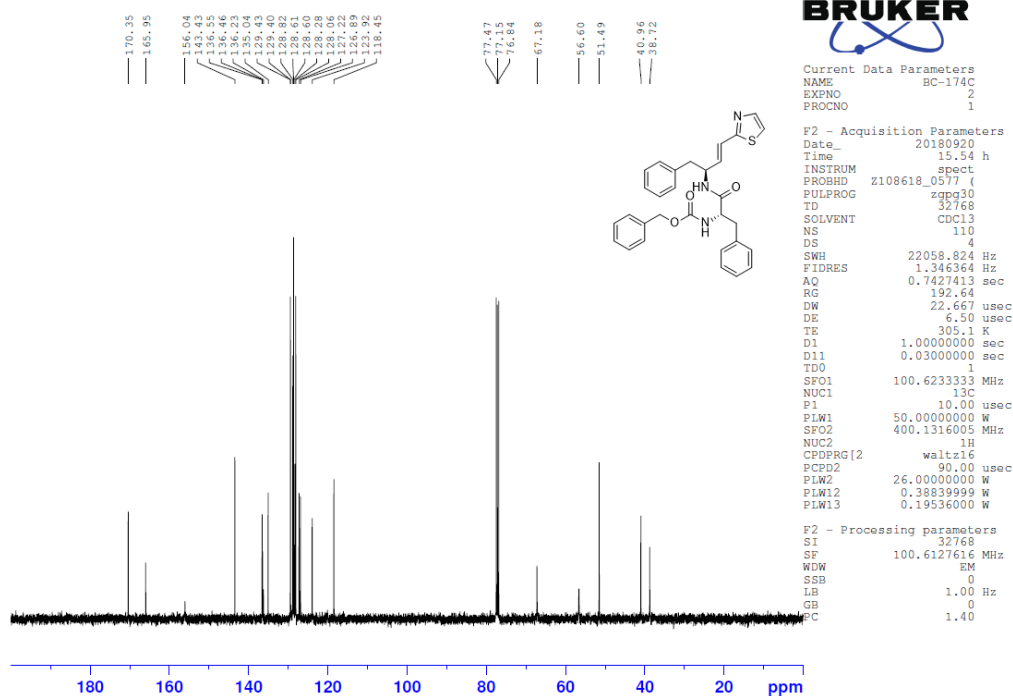

# <sup>1</sup>H NMR spectrum of compound 26

BC-512B, <sup>1</sup>H NMR, solid after 3 ether washes, CDCl<sub>3</sub>

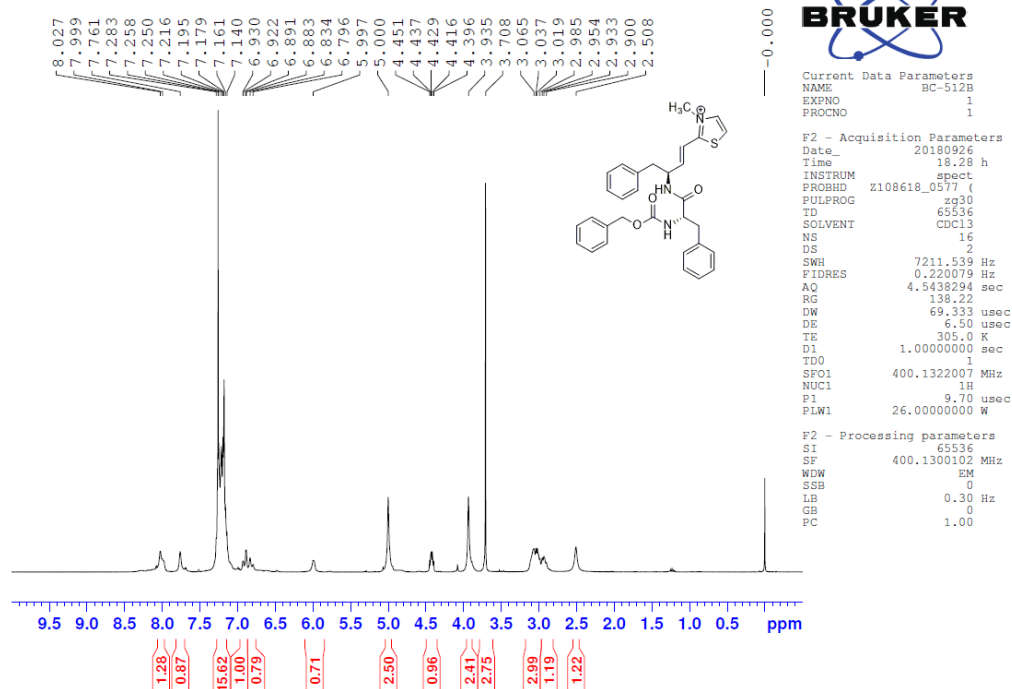

# <sup>13</sup>C NMR spectrum of compound 26

BC-512B, <sup>13</sup>C NMR, solid after 3 ether washes, CDCl<sub>3</sub>

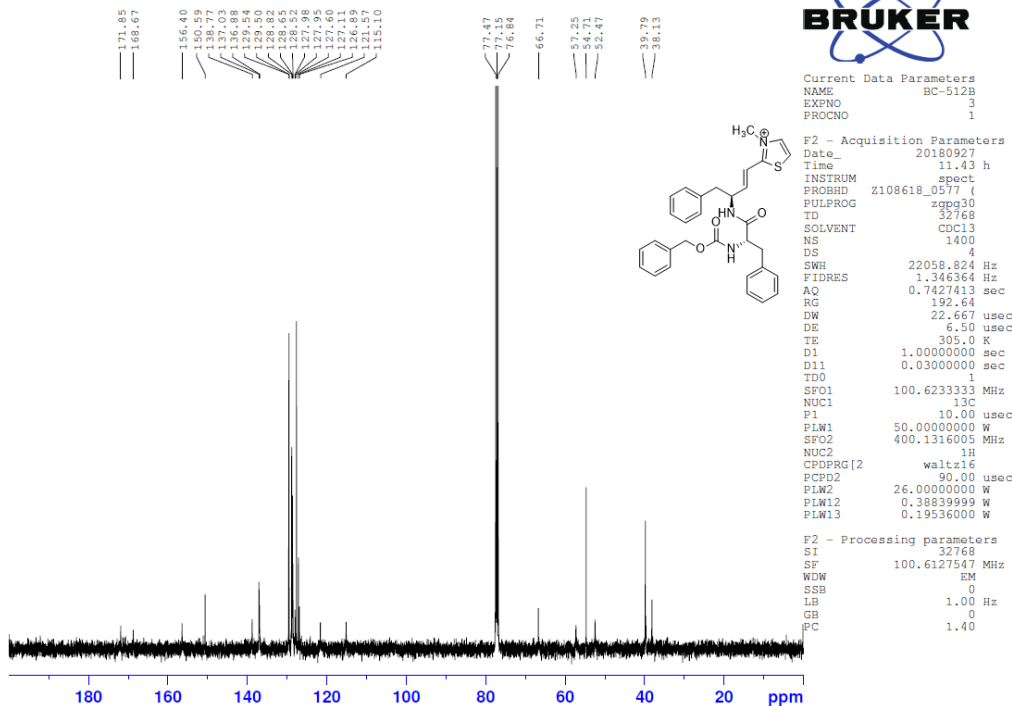

# <sup>1</sup>H NMR spectrum of compound 27

BC-115 1HNMR Purified CDCl<sub>3</sub>

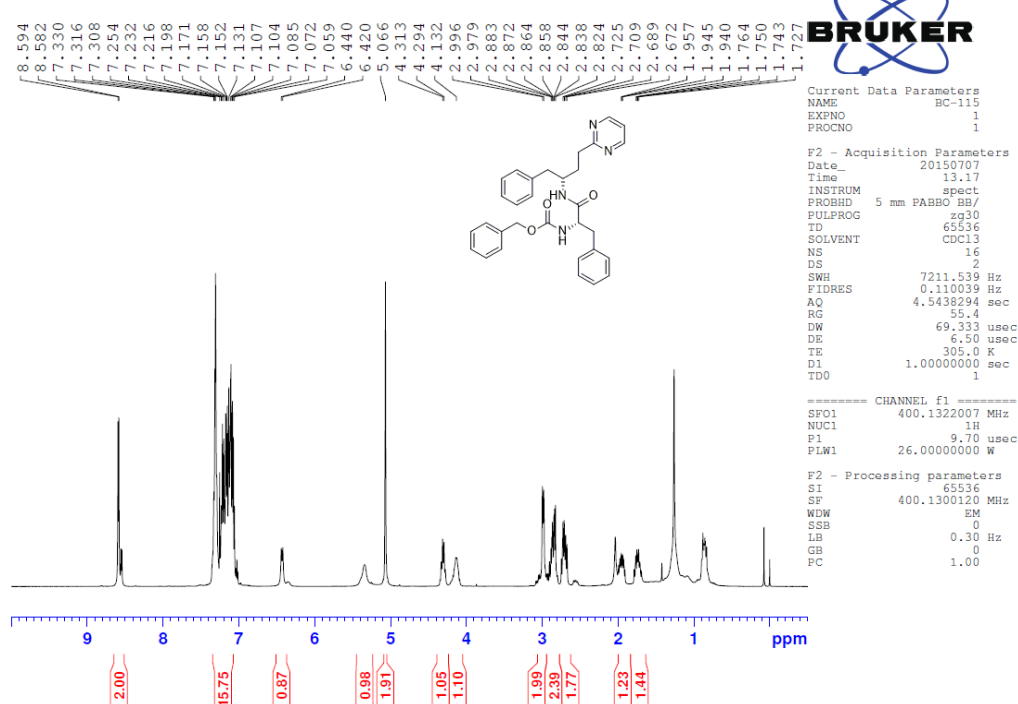

# <sup>13</sup>C NMR spectrum of compound 27

BC-115, C13 NMR, CDCl<sub>3</sub>

CARBON\_TAMU CDCl<sub>3</sub> /data bala 24

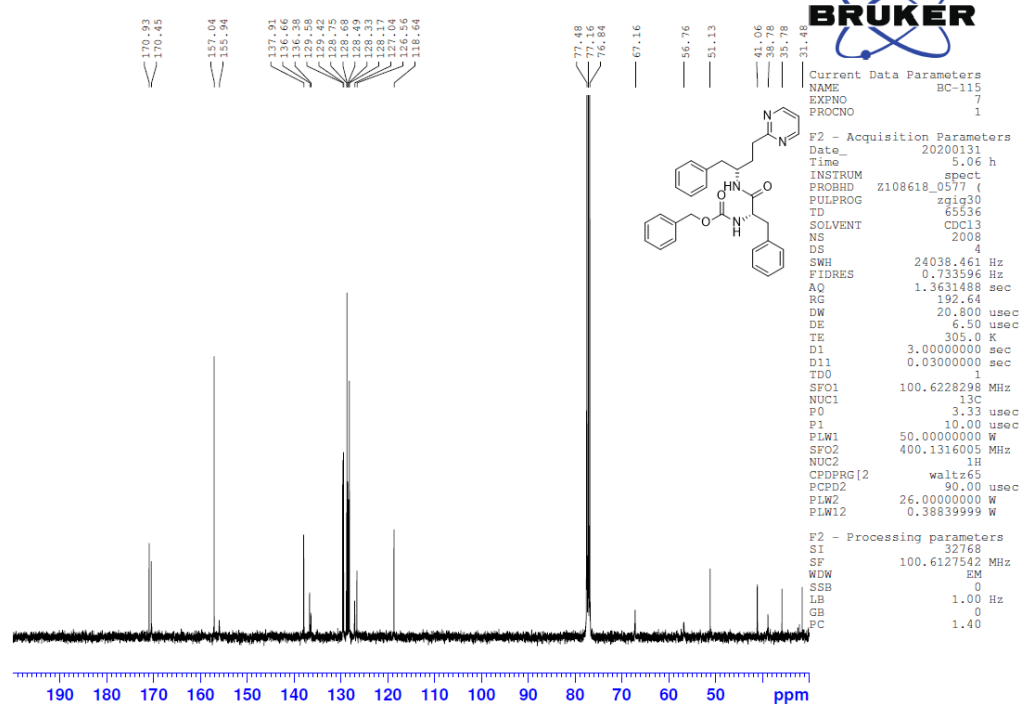



Part 8. Unpublished Data

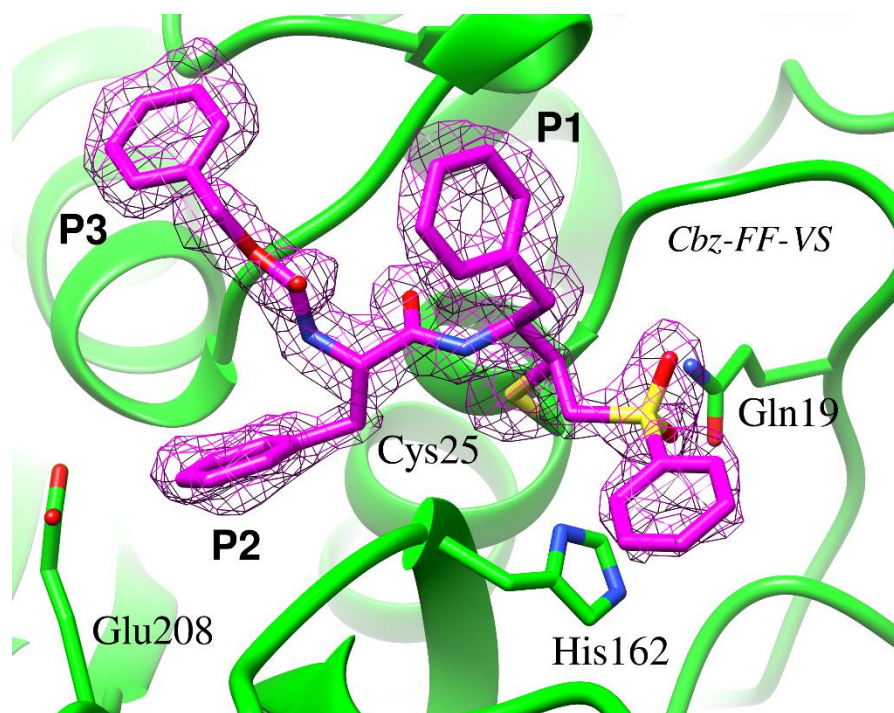

**Figure S4.** Crystal structure of cruzain bound to compound **1**. A covalent bond is evidently formed between the sulfur of Cys<sub>25</sub> and the  $\beta$ -carbon of the former olefin bond (Tang, *et al.*).
